# Supplementary material for: Synthesis of N -glycosyl amides: conformational analysis and evaluation as inhibitors of β-galactosidase from E. coli
Source: Royal Society of Chemistry journal article supplement (doi:10.1039/d3ra07763b), 2024-01-01

## Supporting Information for

### Synthesis of *N*-glycosyl amides. Conformational analysis and evaluation as inhibitors of the $\beta$ -galactosidase from *E. coli*.

Miqueas G. Traverssi,<sup>ab</sup> Verónica E. Manzano,<sup>cd</sup> Oscar Varela<sup>cd</sup> and Juan P. Colomer <sup>\*ab</sup>

<sup>a</sup>Departamento de Química Orgánica, Universidad Nacional de Córdoba, Facultad Ciencias Químicas, Ciudad Universitaria, Edificio de Ciencias II, Córdoba, Argentina. E-mail: juanpablo@fcq.unc.edu.ar

<sup>b</sup>Instituto de Investigaciones en Físico-Química de Córdoba (INFIQC), Consejo Nacional de Investigaciones Científicas y Técnicas (CONICET), UNC, Argentina

<sup>c</sup>Departamento de Química Orgánica, Universidad de Buenos Aires, Facultad Ciencias Exactas y Naturales, Ciudad Universitaria, Pab. 2, C1428EHA, Buenos Aires, Argentina

<sup>d</sup>Centro de Investigación en Hidratos de Carbono (CIHIDECAR), Consejo Nacional de Investigaciones Científicas y Técnicas (CONICET), UBA, Argentina

## Index

### Contents

|                                                                                                                                                                                                      |    |
|------------------------------------------------------------------------------------------------------------------------------------------------------------------------------------------------------|----|
| Table 1. Chair conformations <sup>4</sup> C <sub>1</sub> and <sup>1</sup> C <sub>4</sub> and energies obtained for the <i>xylo</i> derivatives by conformational search employing MMFF94. ....       | 2  |
| <sup>1</sup> H and <sup>13</sup> C NMR spectra of glycosyl azides <b>5a-c</b> . ....                                                                                                                 | 3  |
| <sup>1</sup> H and <sup>13</sup> C NMR spectra of thioglyco acid <b>13<math>\beta</math></b> and <b>13<math>\alpha</math></b> . ....                                                                 | 9  |
| <sup>1</sup> H and <sup>13</sup> C NMR spectra of glycosylamines <b>2c<math>\alpha</math></b> and <b>2c<math>\beta</math></b> . ....                                                                 | 12 |
| <sup>1</sup> H, <sup>13</sup> C, and NOESY NMR spectra of per- <i>O</i> -acetyl <i>N</i> -glycosyl amides <b>14a-c</b> , <b>15a-c</b> , and <b>16a-c</b> . ....                                      | 14 |
| <sup>1</sup> H, <sup>13</sup> C, and NOESY NMR spectra of free <i>N</i> -glycosyl amides <b>17a-c<math>\beta</math></b> , <b>18a-c<math>\beta</math></b> , and <b>19a-c<math>\beta</math></b> . .... | 38 |

Table 1. Chair conformations  ${}^4C_1$  and  ${}^1C_4$  and energies obtained for the *xylo* derivatives by conformational search employing MMFF94.

| Entry | Compound     | Conformation ${}^4C_1$                                                                                    | Conformation ${}^1C_4$                                                                                     |
|-------|--------------|-----------------------------------------------------------------------------------------------------------|------------------------------------------------------------------------------------------------------------|
| 1     | 14c $\beta$  | 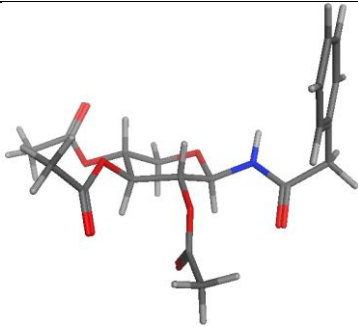 <p>18.47 kcal/mol</p>   | Not found                                                                                                  |
| 2     | 15c $\beta$  |  <p>34.85 kcal/mol</p>  | Not found                                                                                                  |
| 3     | 16c $\beta$  |  <p>5.82 kcal/mol</p>  | Not found                                                                                                  |
| 4     | 14c $\alpha$ |  <p>19.71 kcal/mol</p> |  <p>18.25 kcal/mol</p> |
| 5     | 15c $\alpha$ |  <p>36.54 kcal/mol</p> |                        |

|   |              |           |                                                                                                                                                                                       |
|---|--------------|-----------|---------------------------------------------------------------------------------------------------------------------------------------------------------------------------------------|
| 6 | 16c $\alpha$ | Not found | <p style="text-align: center;">33.99 kcal/mol</p> 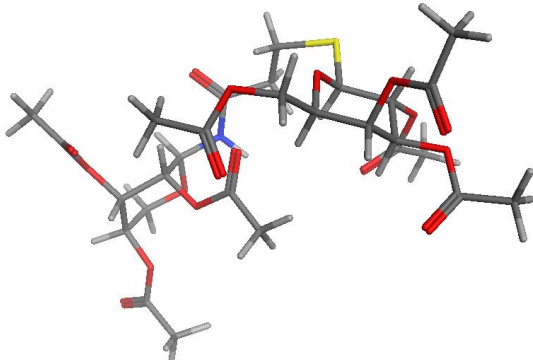 <p style="text-align: center;">6.50 kcal/mol</p> |
|---|--------------|-----------|---------------------------------------------------------------------------------------------------------------------------------------------------------------------------------------|

$^1\text{H}$  and  $^{13}\text{C}$  NMR spectra of glycosyl azides **5a-c**.

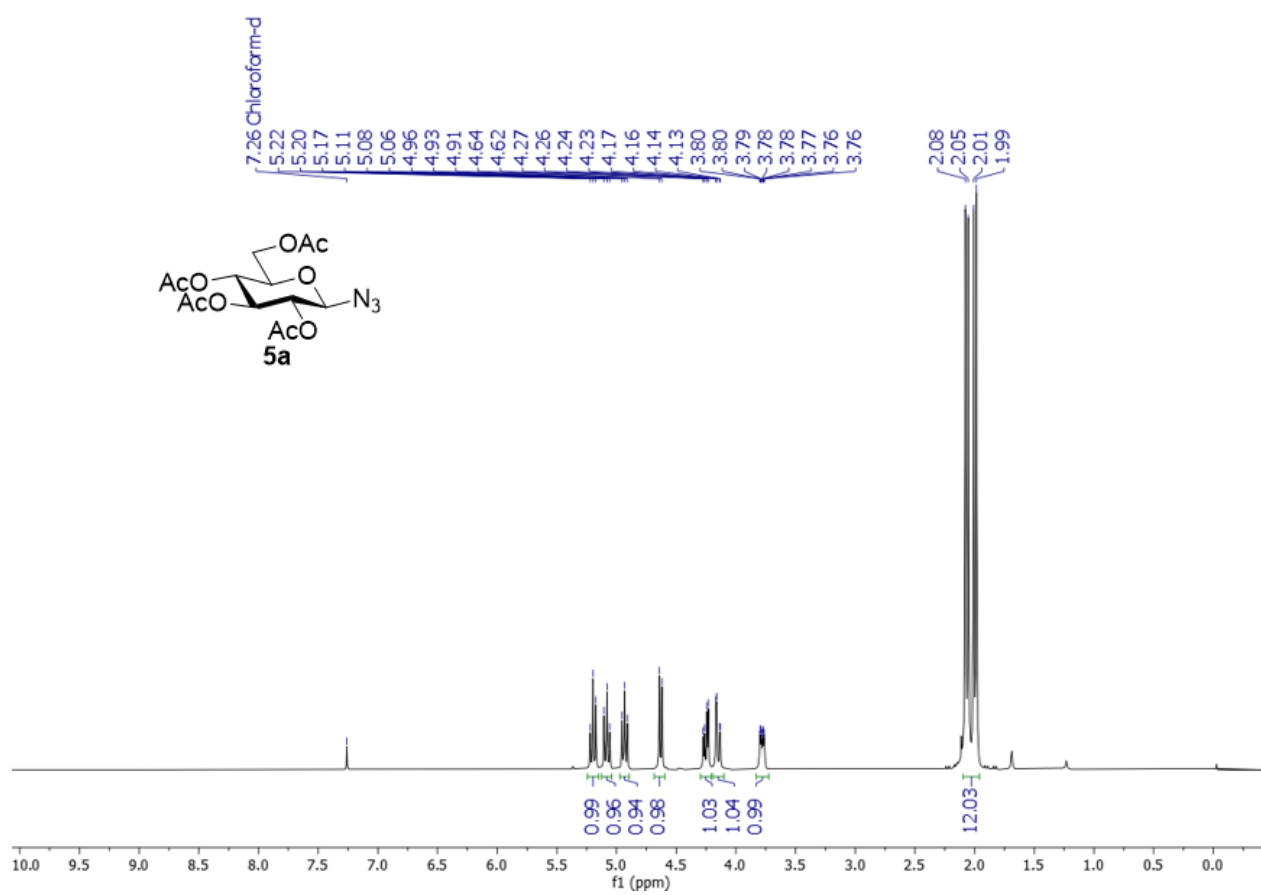

-7.26 CDCl3

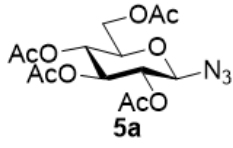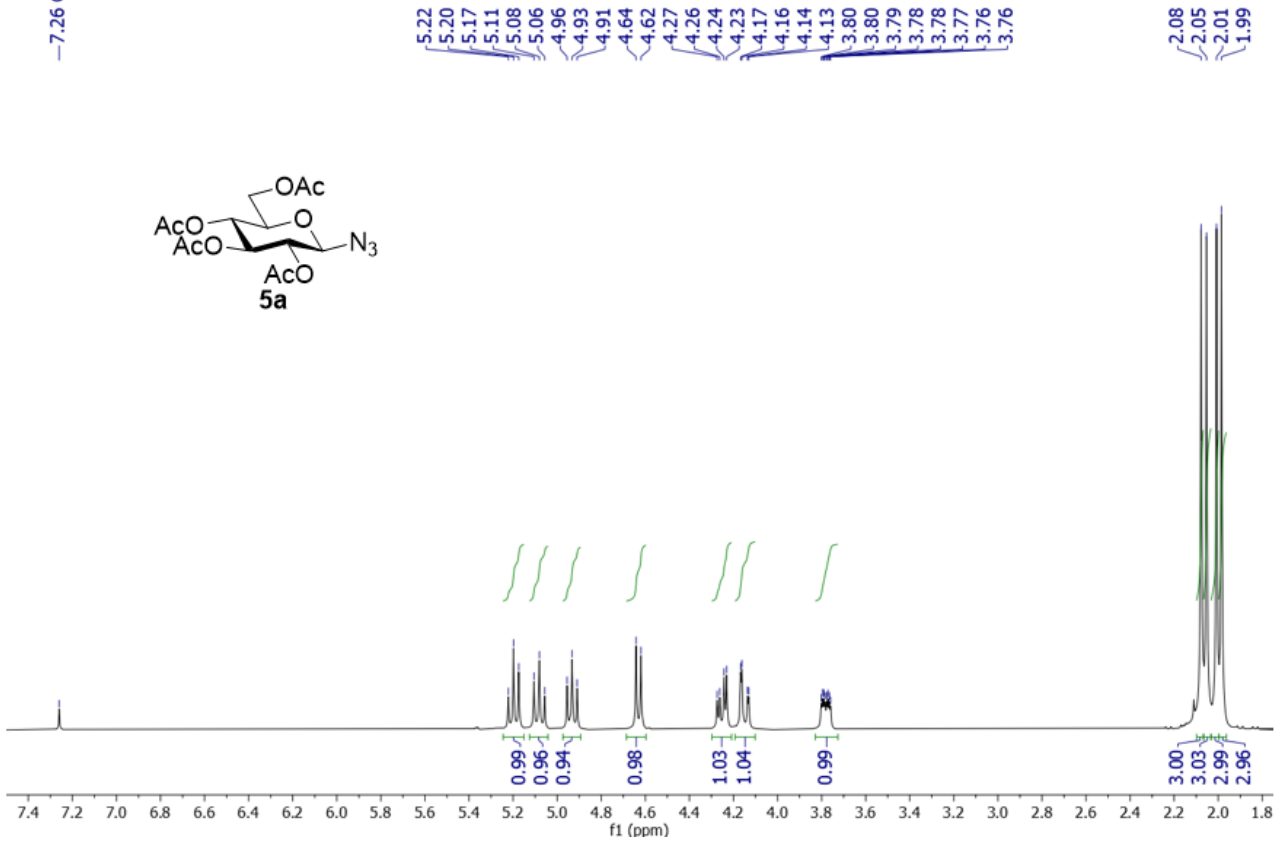

170.7  
170.2  
169.4  
169.3

-88.0

77.2 CDCl3

74.2

72.7

70.8

68.0

61.8

20.8

20.6

20.6

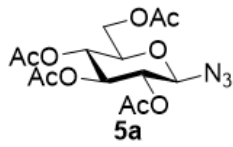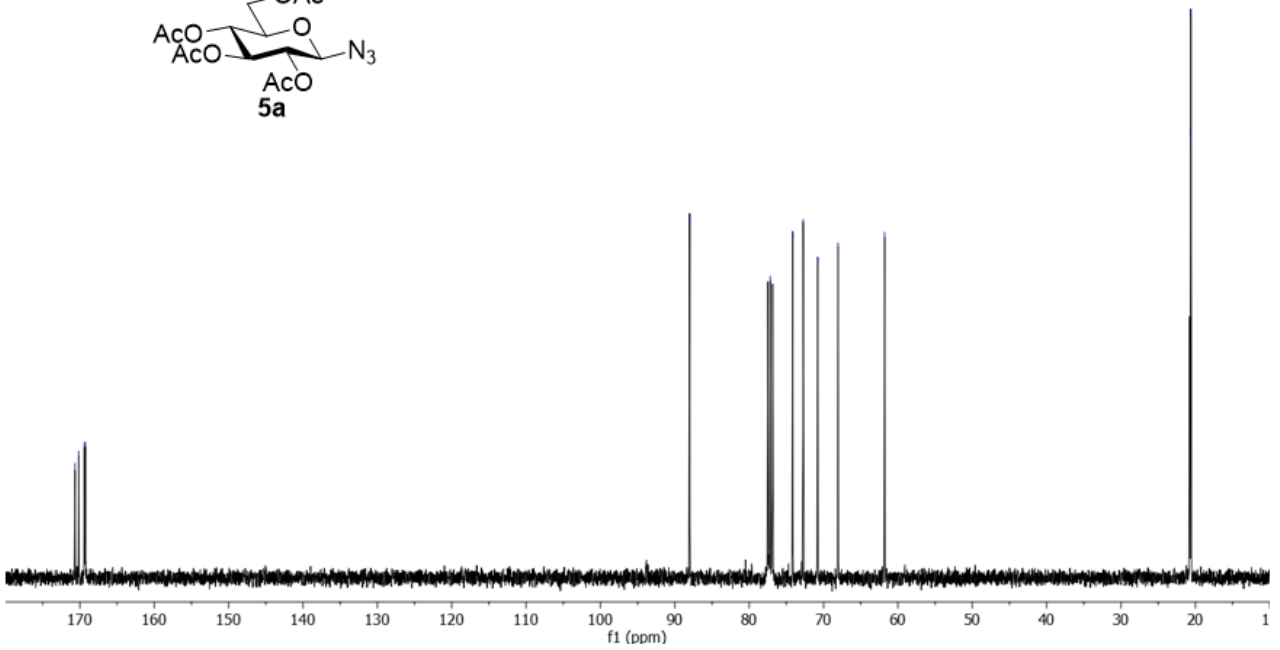

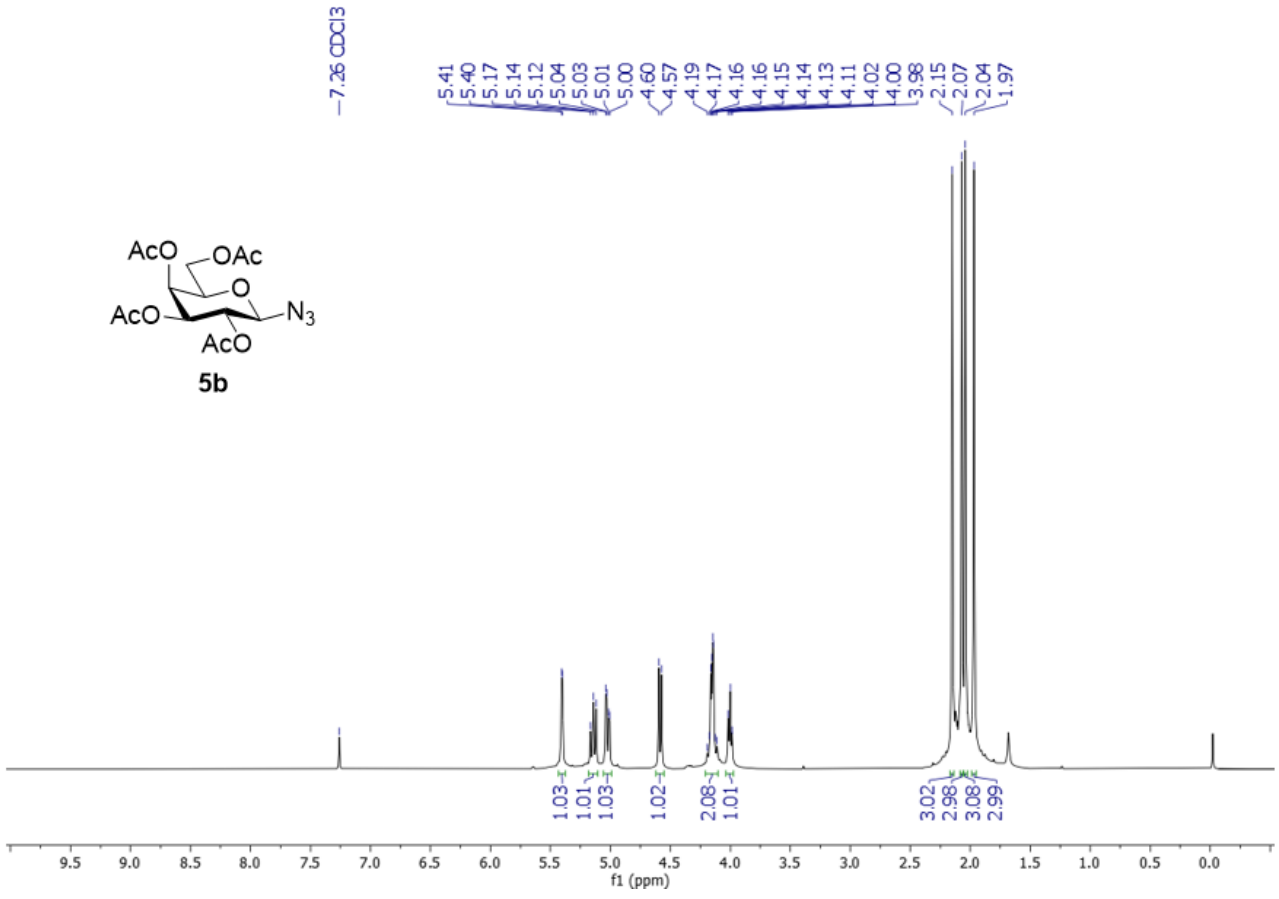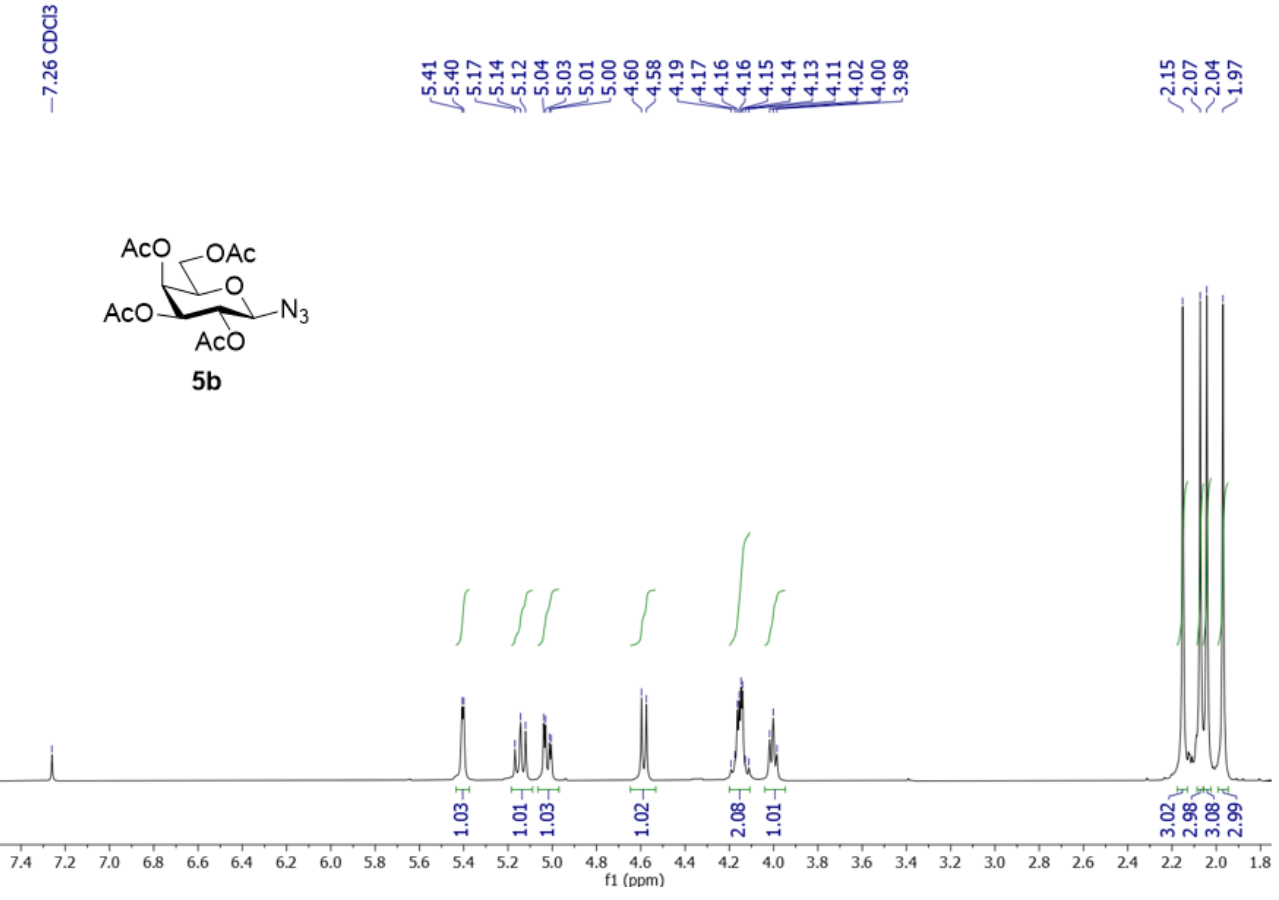

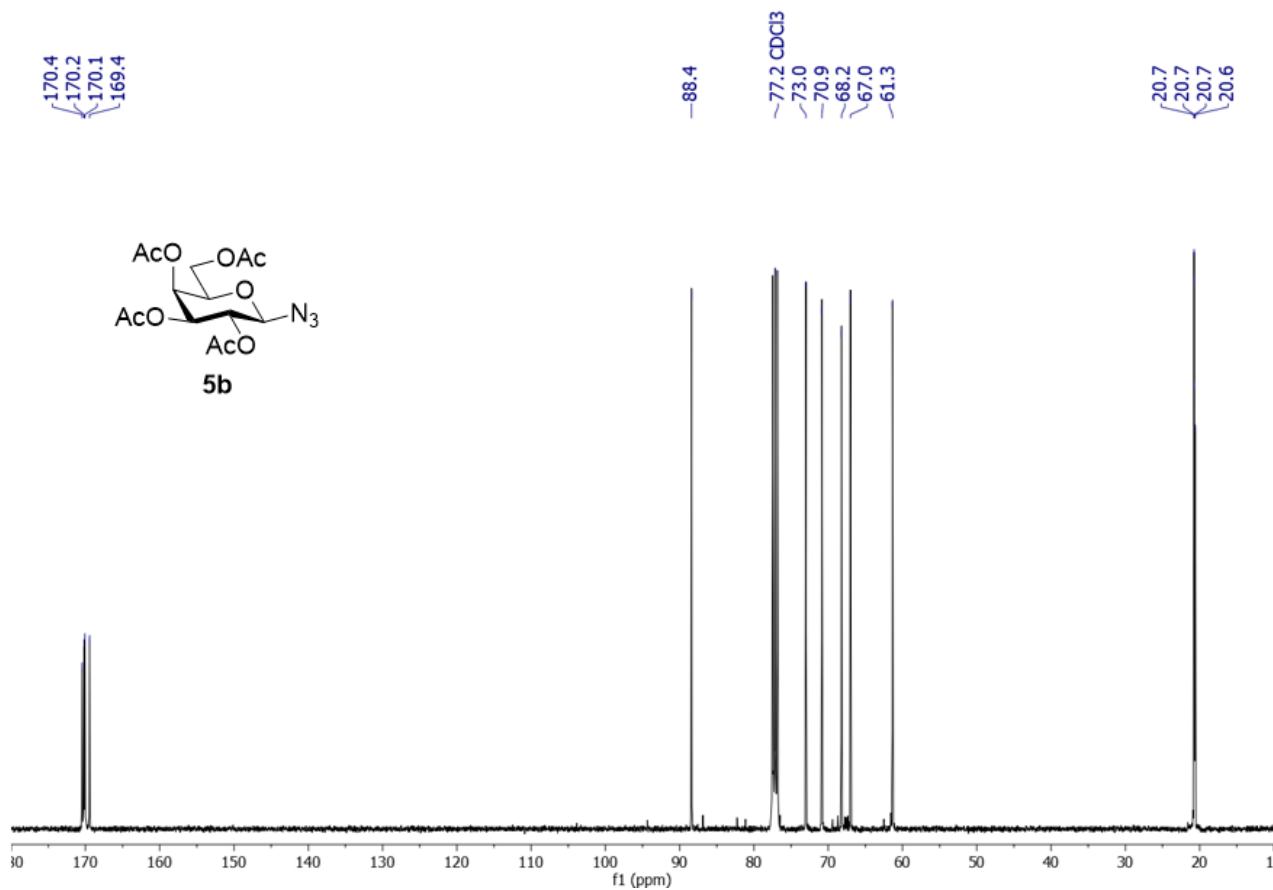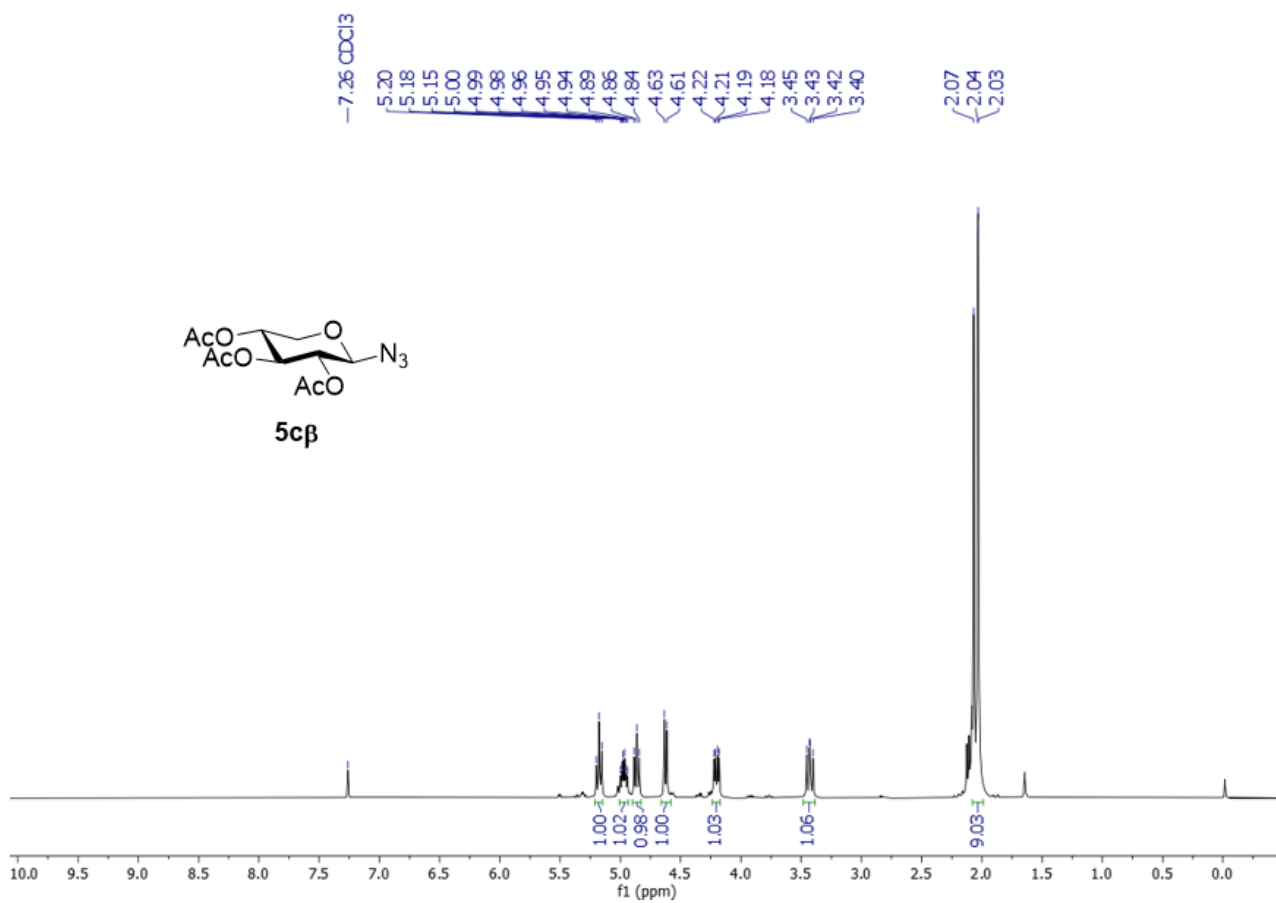

-7.26 CDCl<sub>3</sub>

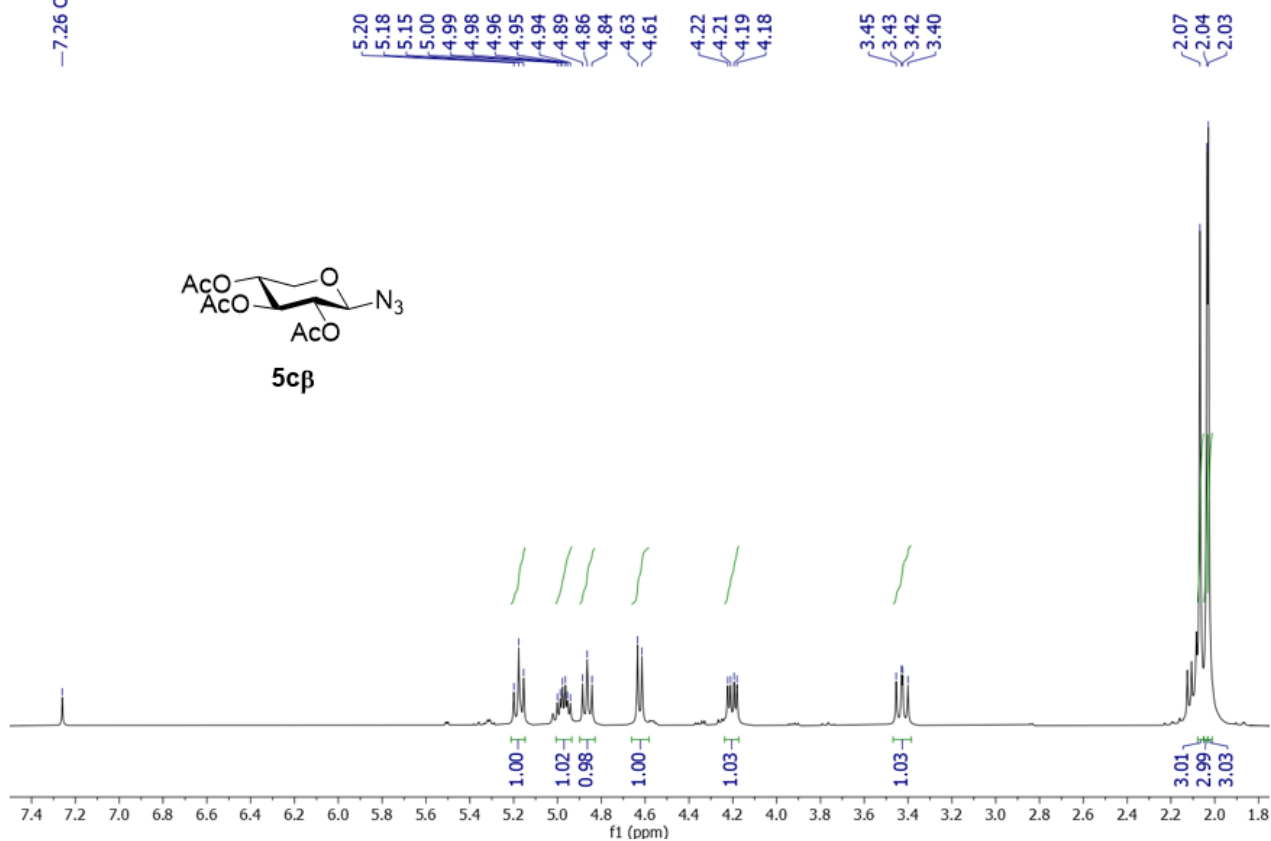

170.1  
169.8  
169.4

-88.4

77.2 CDCl<sub>3</sub>

71.6

70.5

68.5

64.4

20.8

20.7

20.7

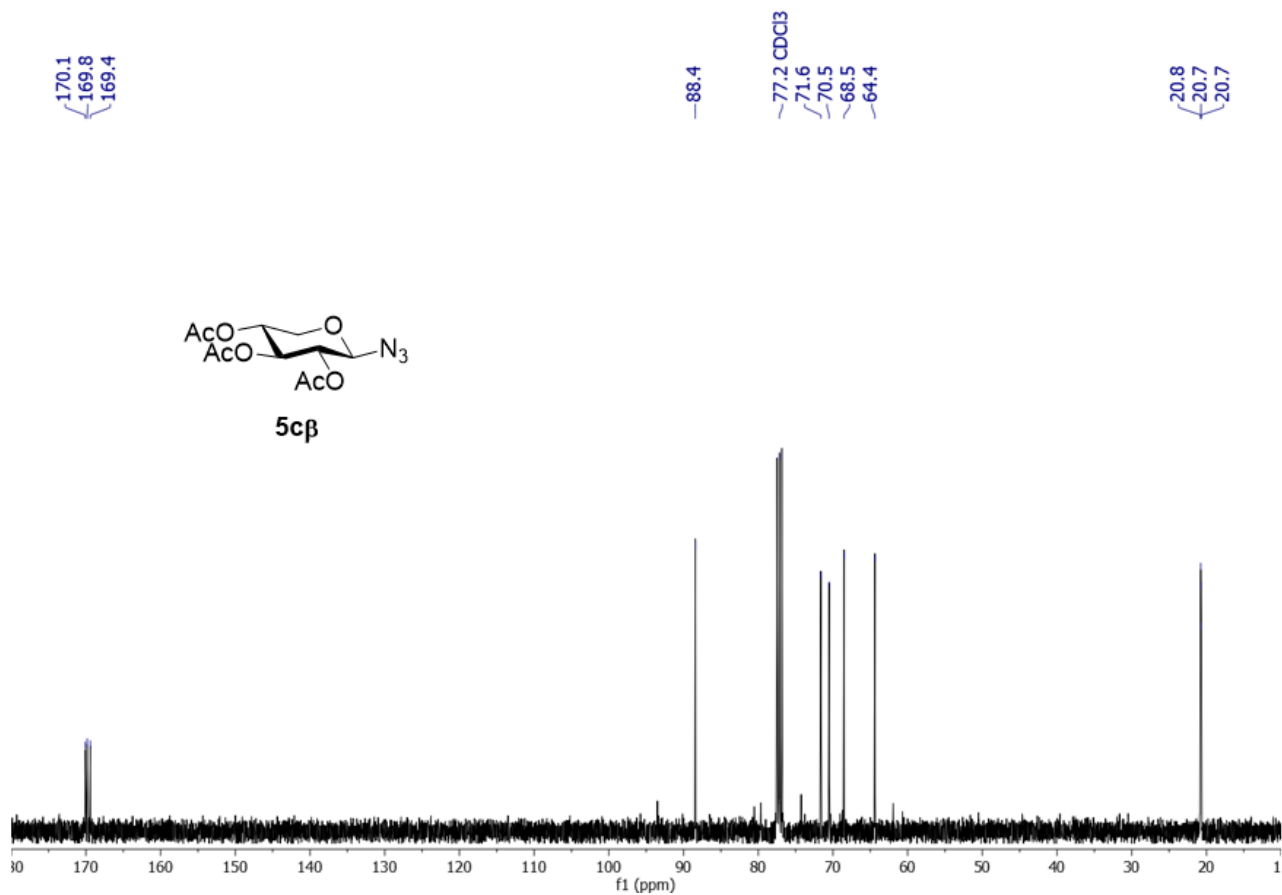

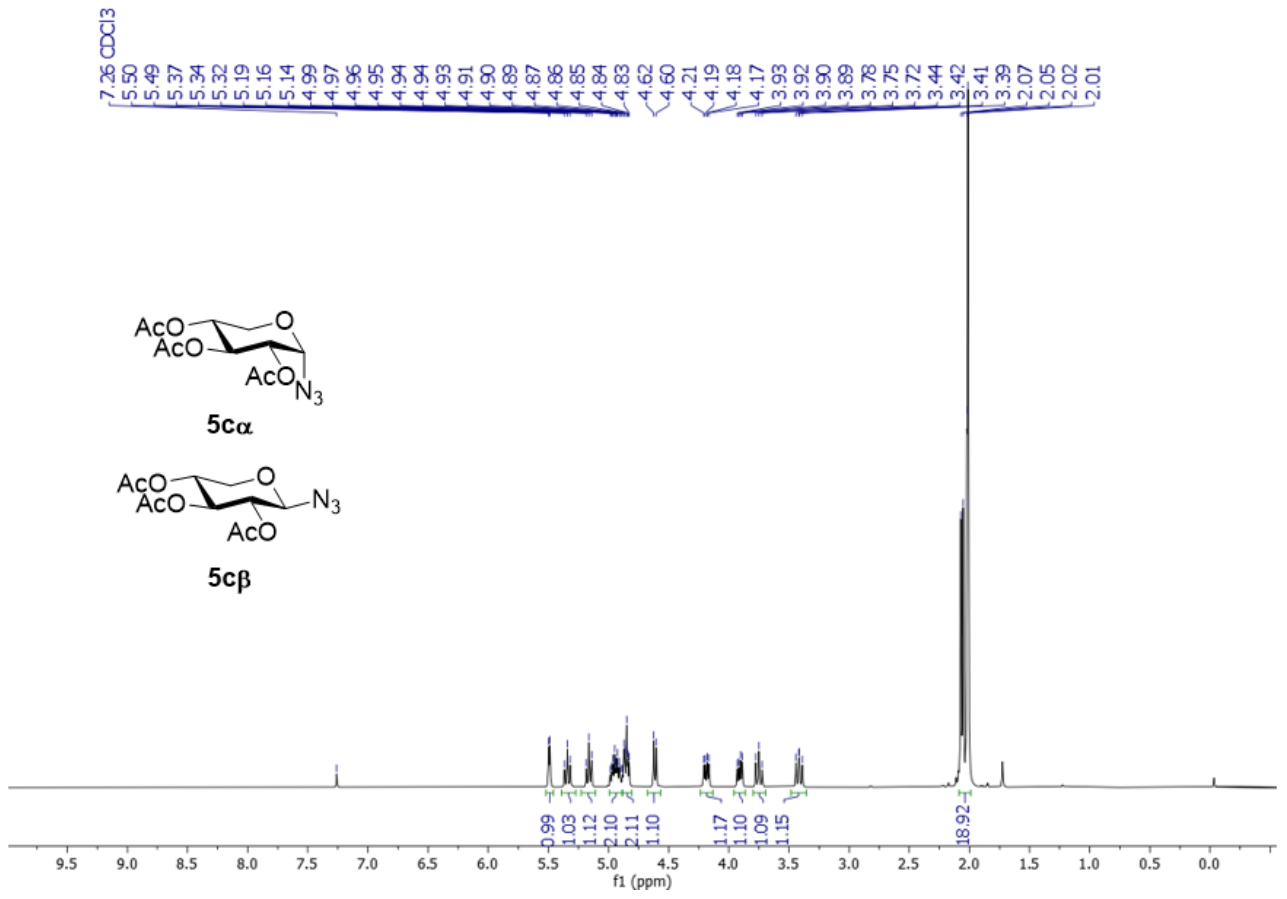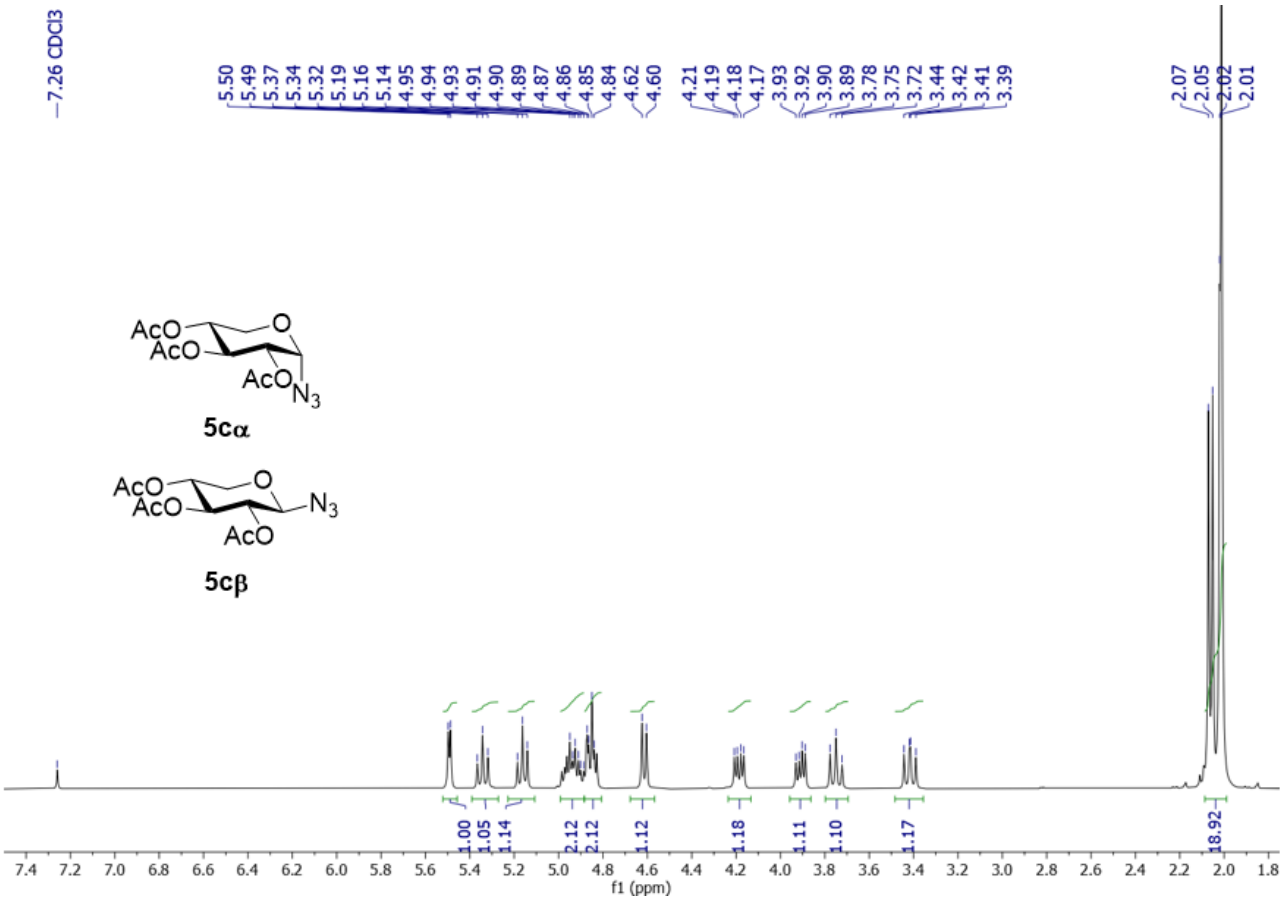



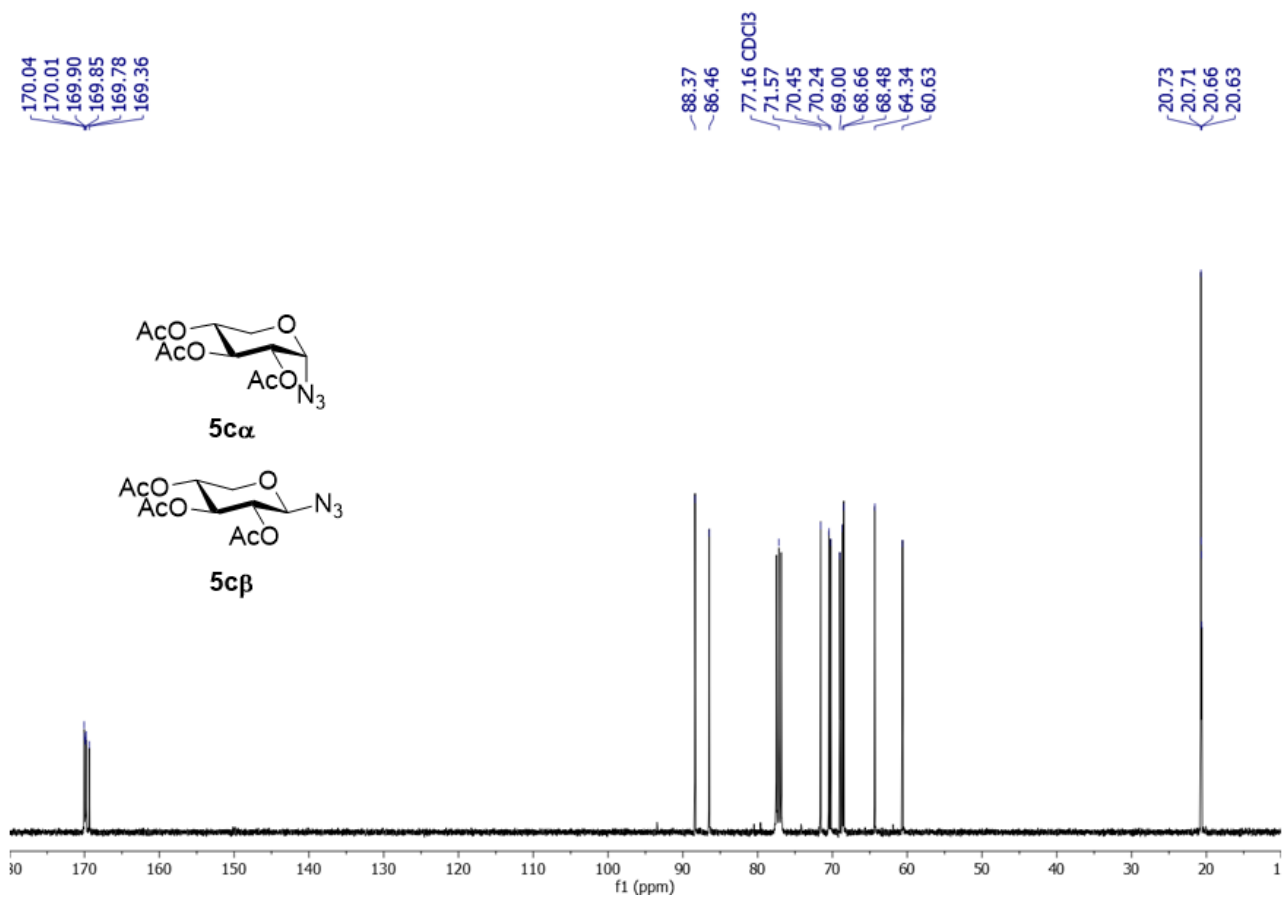

<sup>1</sup>H and <sup>13</sup>C NMR spectra of thioglyco acid **13 $\beta$**  and **13 $\alpha$** .

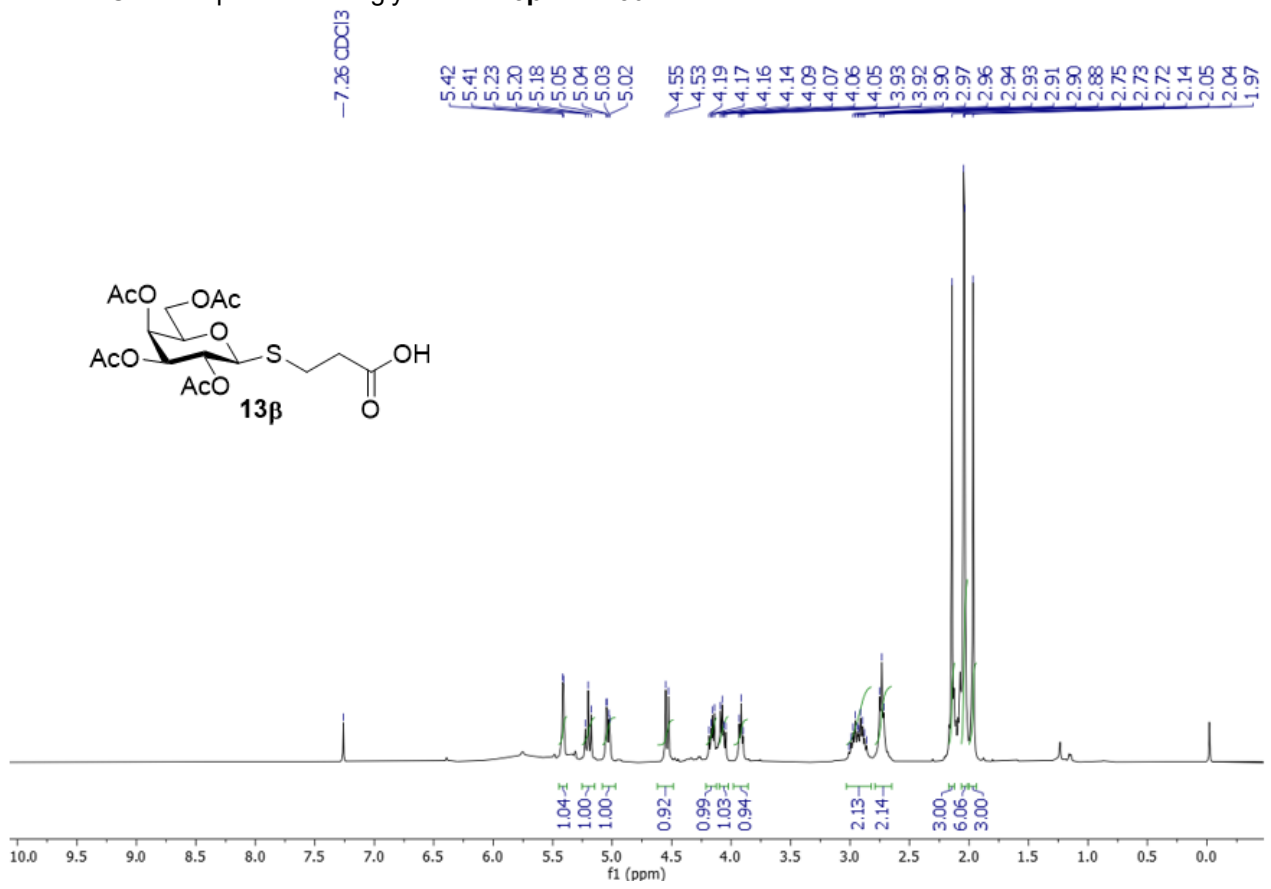

-7.26 CDCl<sub>3</sub>

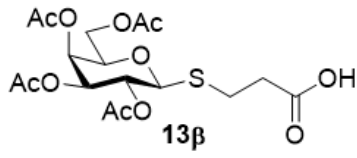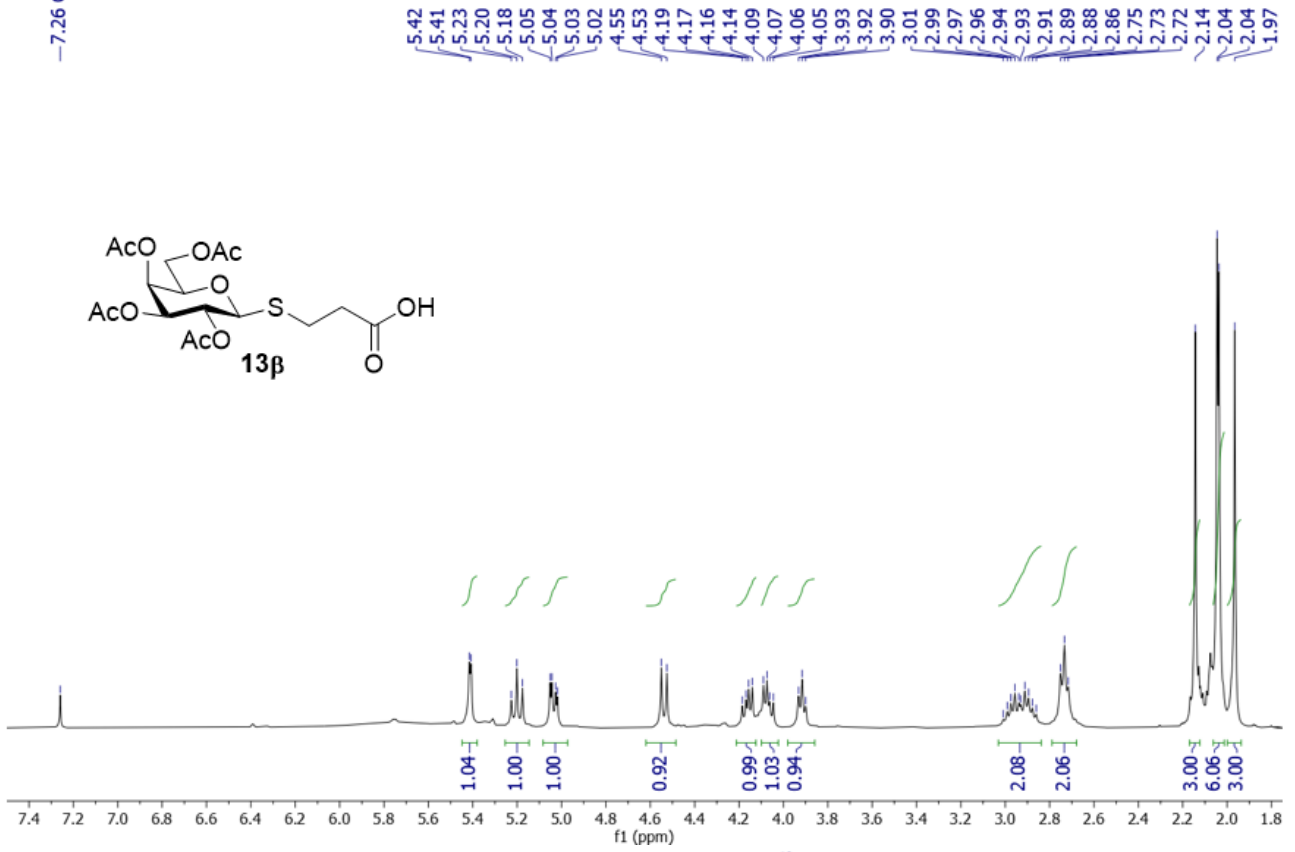

176.5  
170.7  
170.4  
170.2  
169.8

-84.7  
-77.2 CDCl<sub>3</sub>  
-74.6  
-72.0  
-67.4  
-67.3  
-61.7

-35.4  
25.5  
20.9  
20.7  
20.7

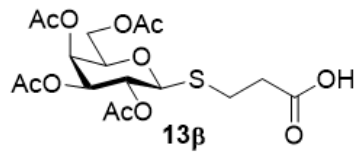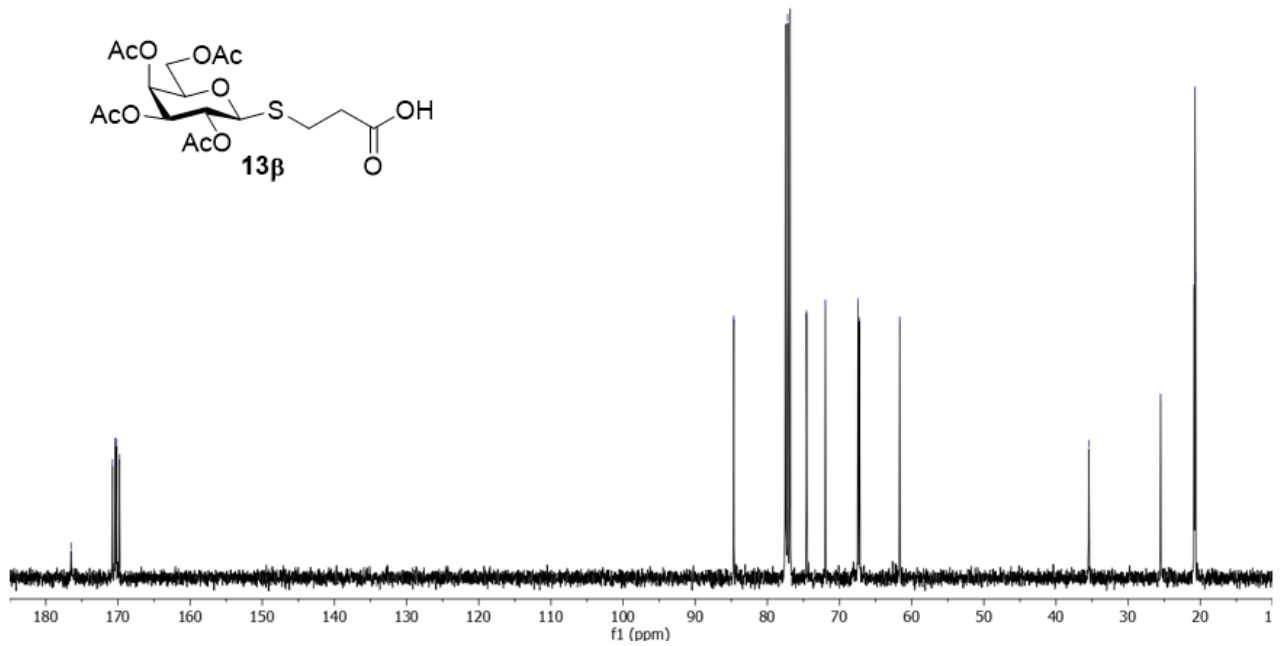

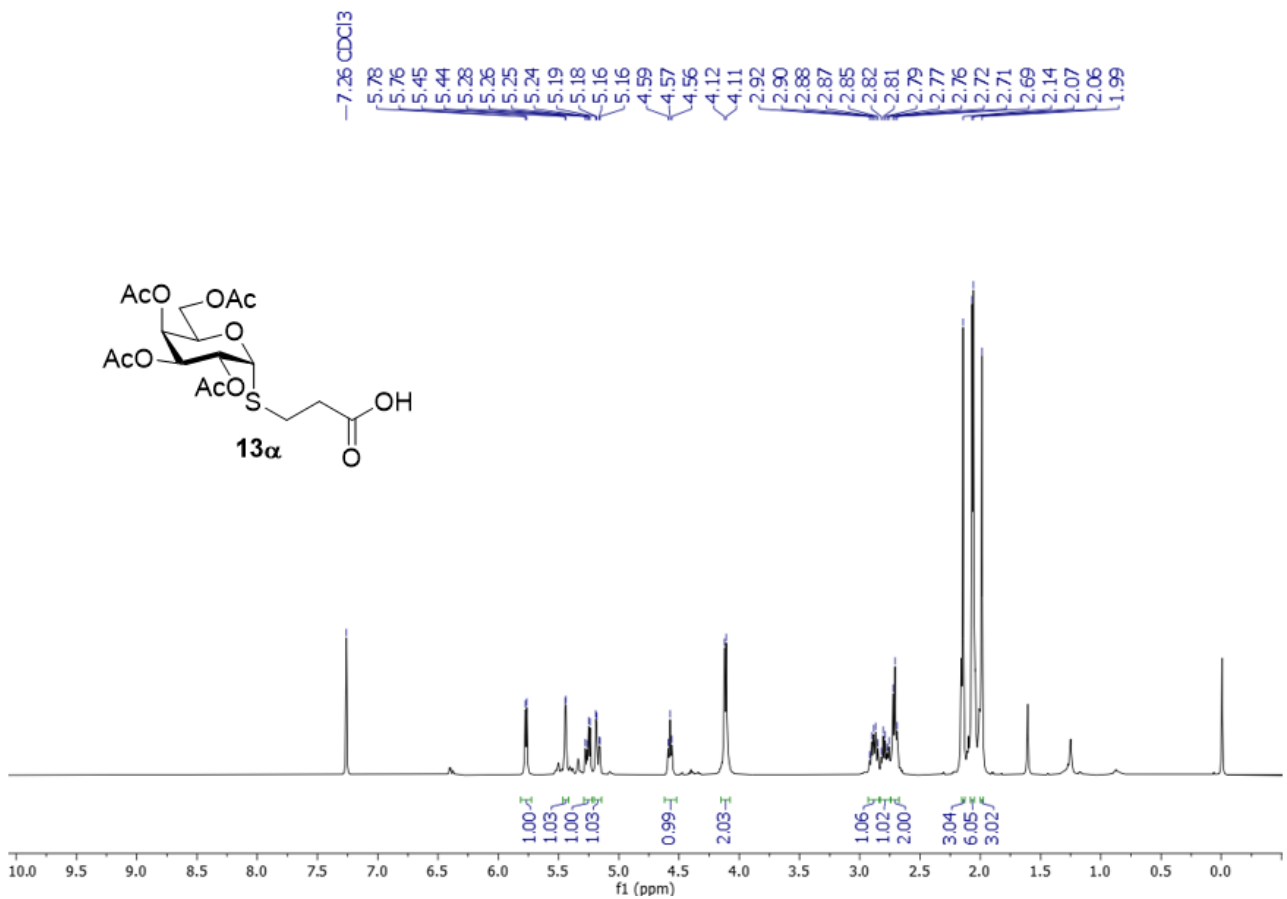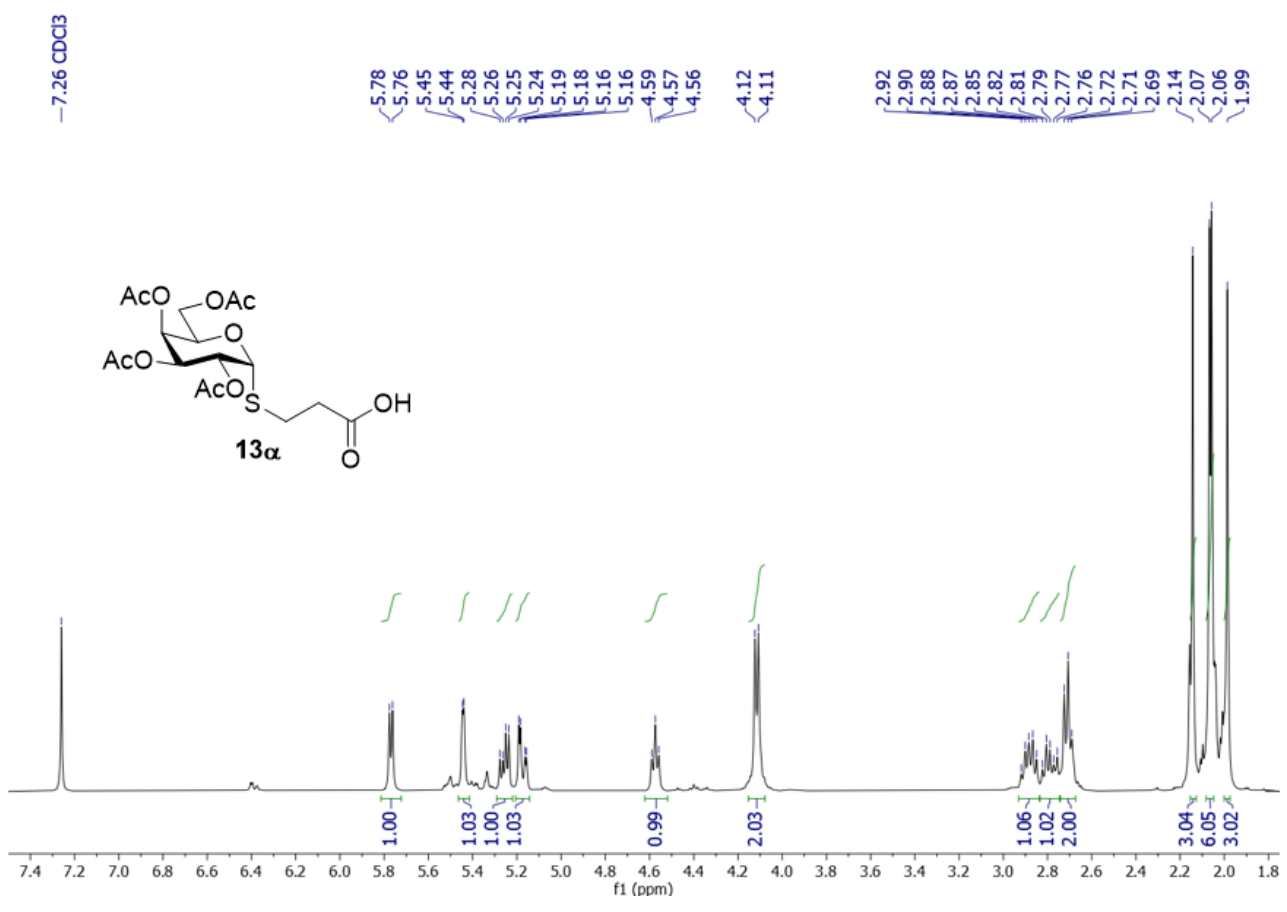

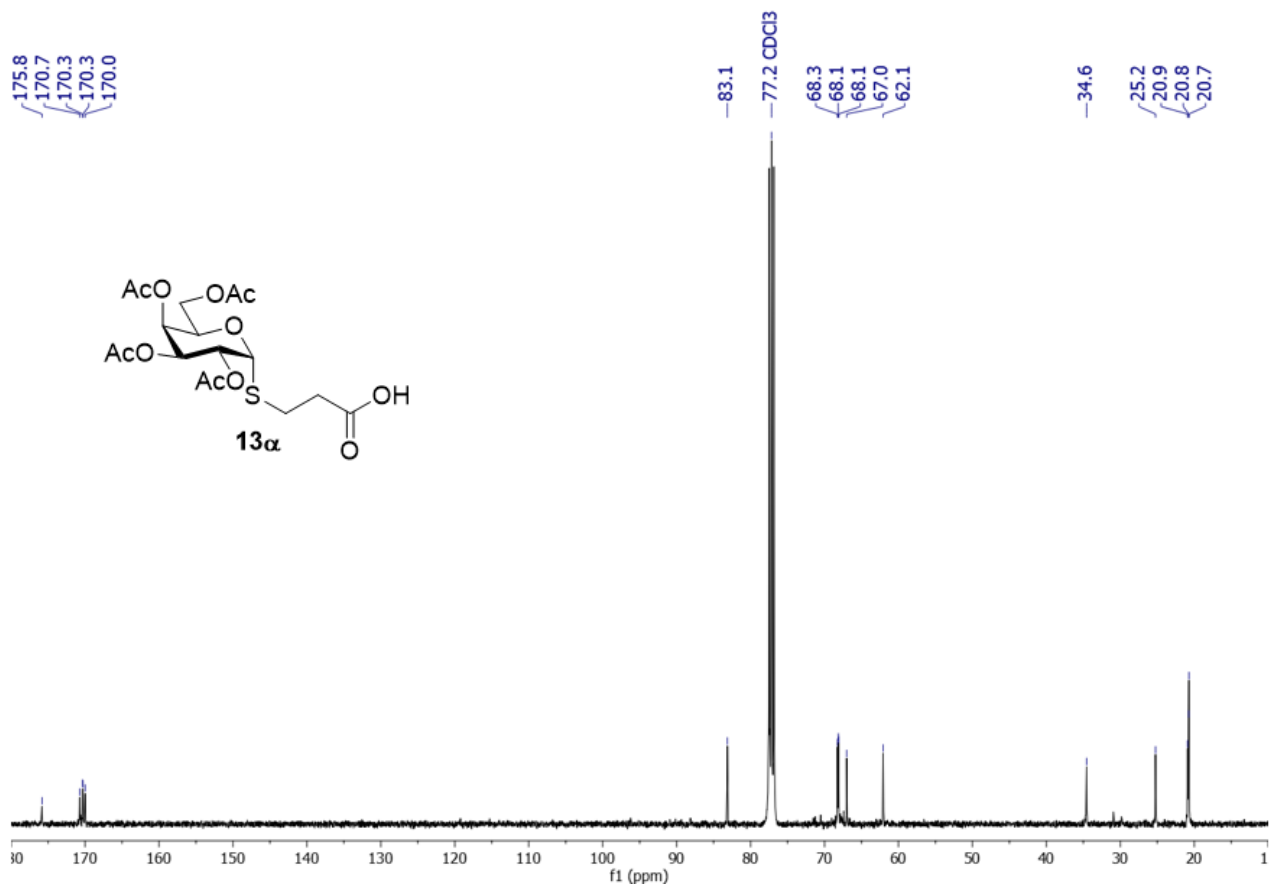

<sup>1</sup>H and <sup>13</sup>C NMR spectra of glycosylamines **2cα** and **2cβ**.

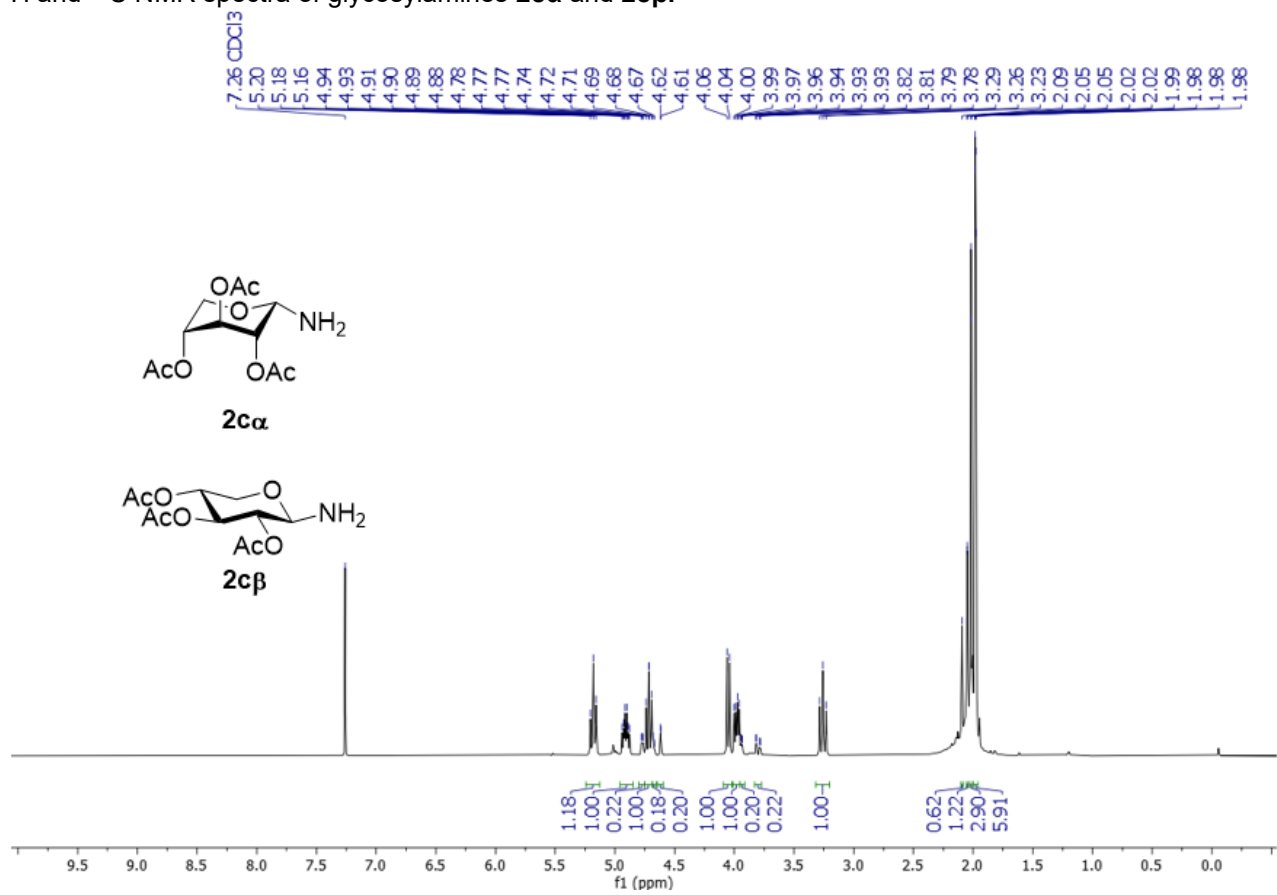

-7.26 CDCl<sub>3</sub>

5.20  
5.18  
5.16  
4.94  
4.93  
4.92  
4.91  
4.90  
4.89  
4.88  
4.78  
4.78  
4.77  
4.77  
4.76  
4.76  
4.74  
4.72  
4.71  
4.69  
4.62  
4.61  
4.06  
4.04  
4.00  
3.99  
3.97  
3.96  
3.95  
3.94  
3.93  
3.82  
3.81  
3.79  
3.78  
3.29  
3.26  
3.26  
3.23  
2.09  
2.05  
2.05  
2.02  
1.98  
1.98

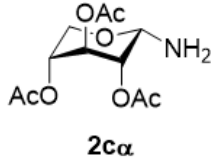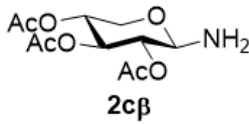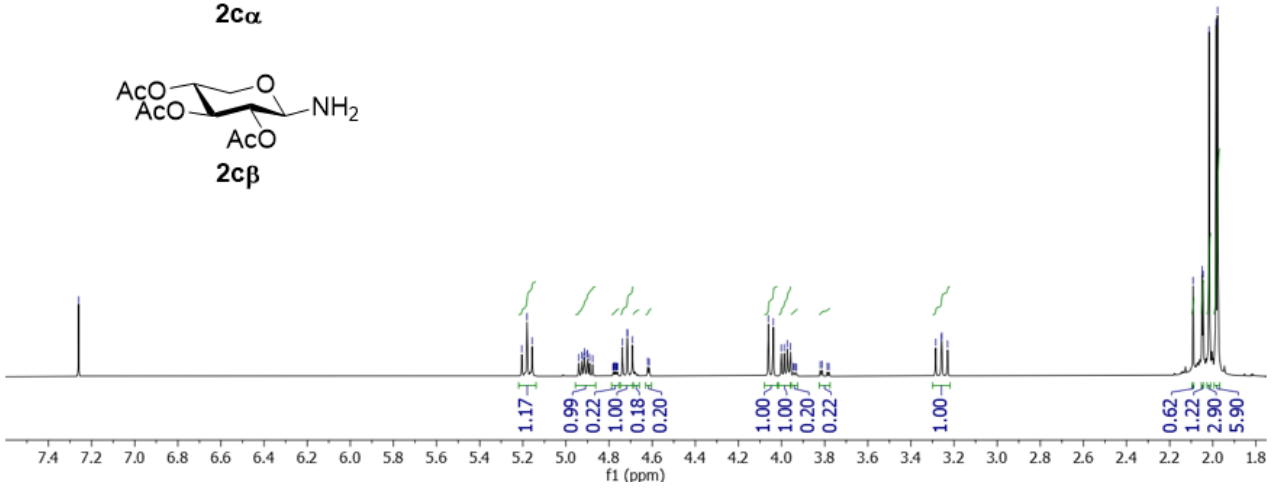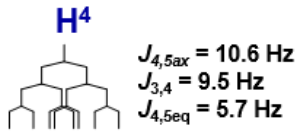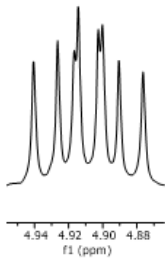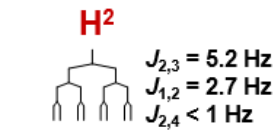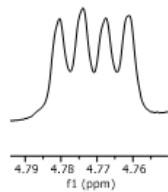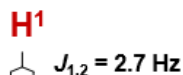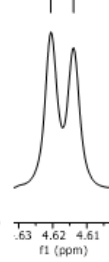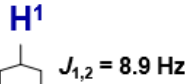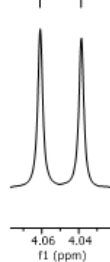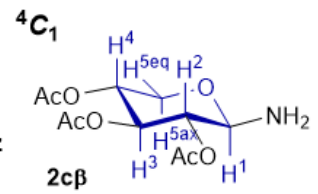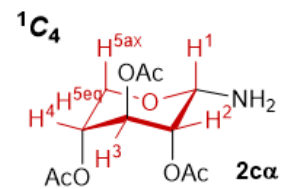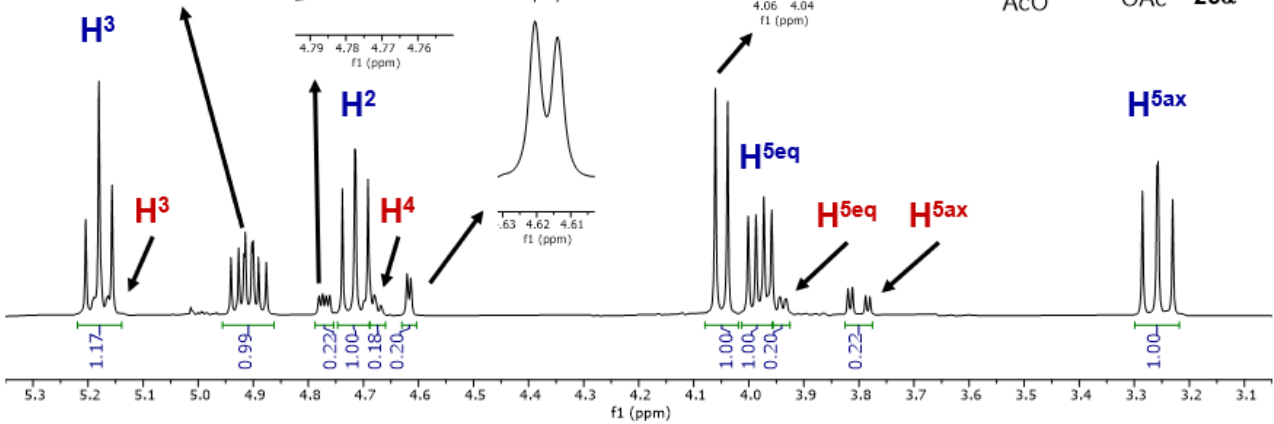

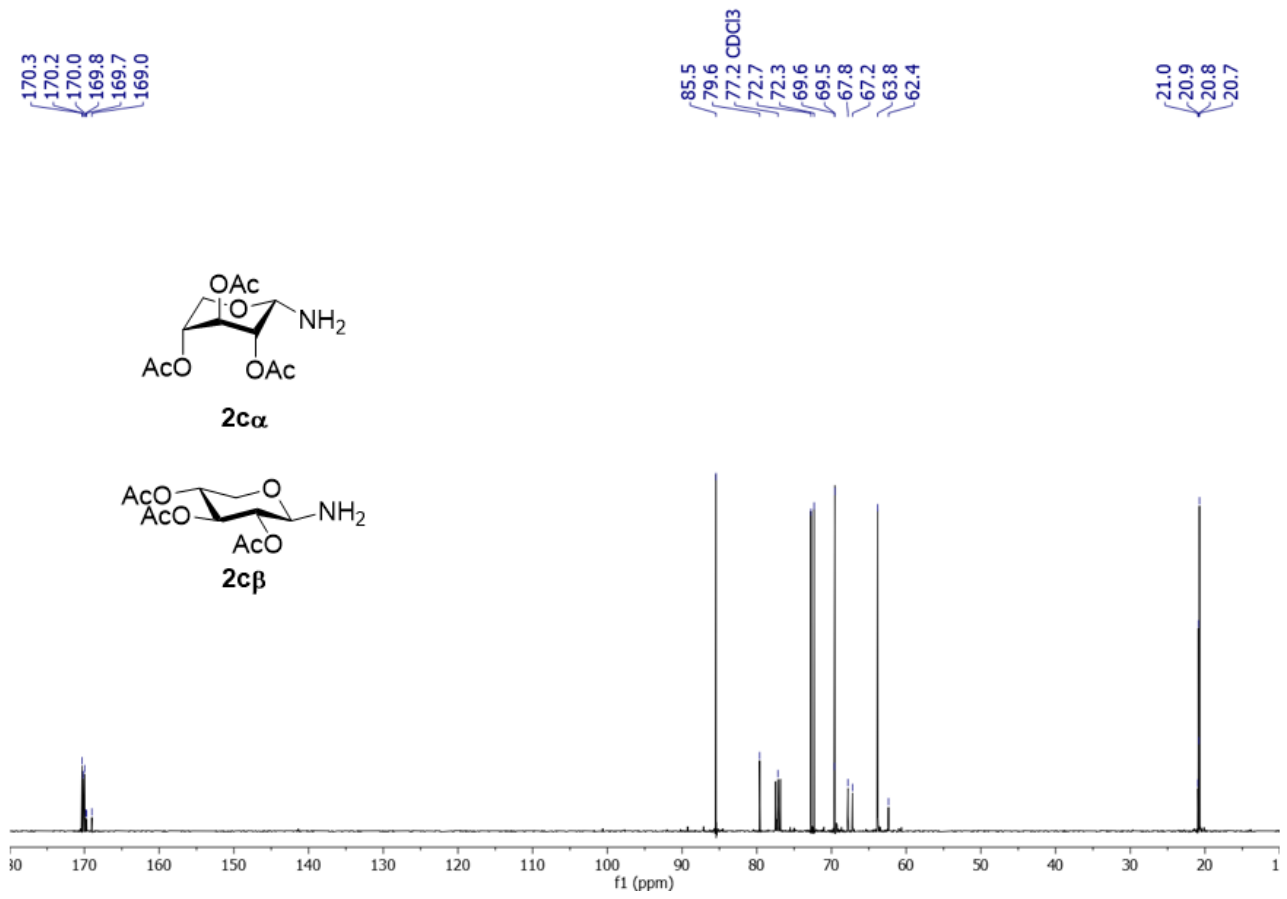

<sup>1</sup>H, <sup>13</sup>C, and NOESY NMR spectra of per-O-acetyl N-glycosyl amides **14a-c**, **15a-c**, and **16a-c**.

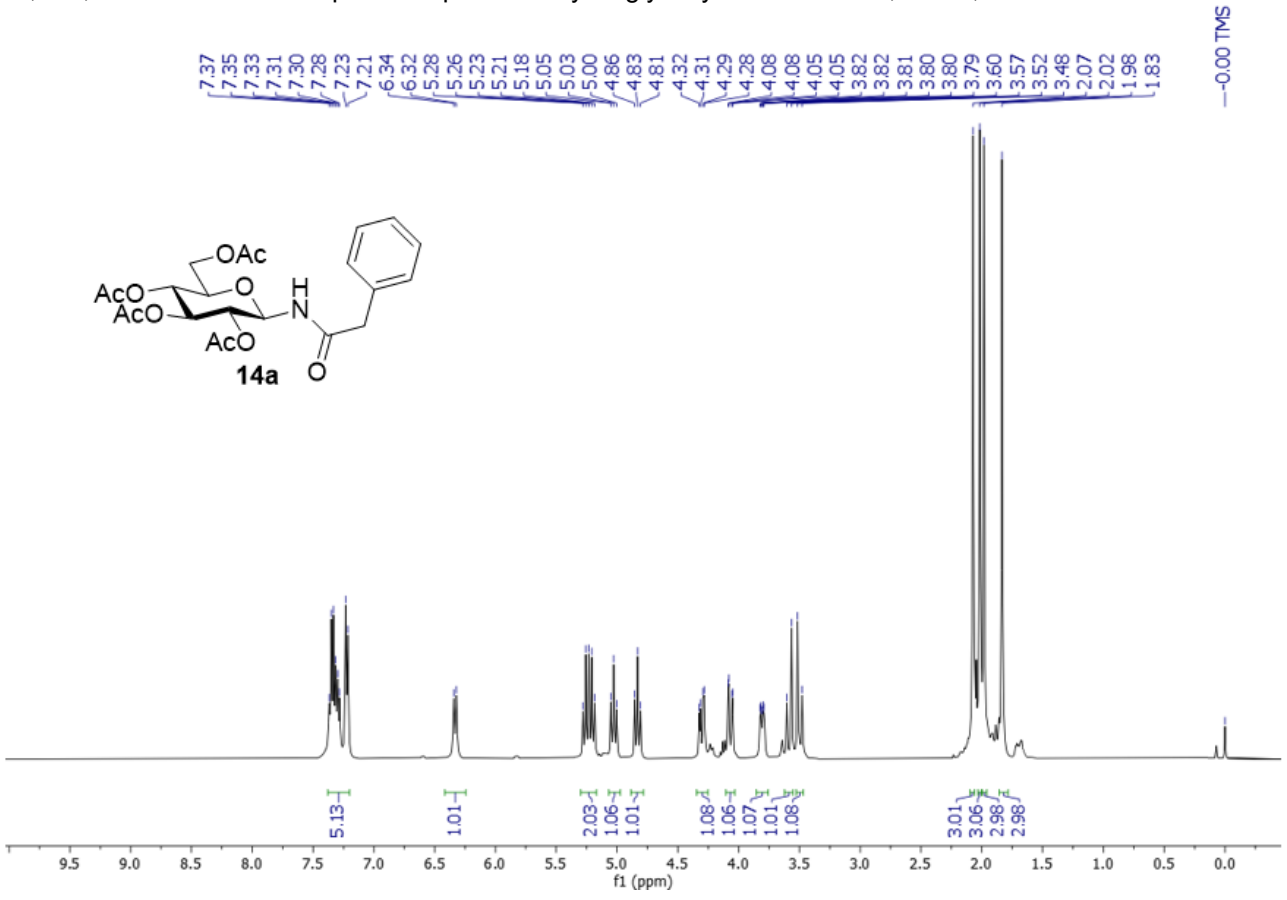

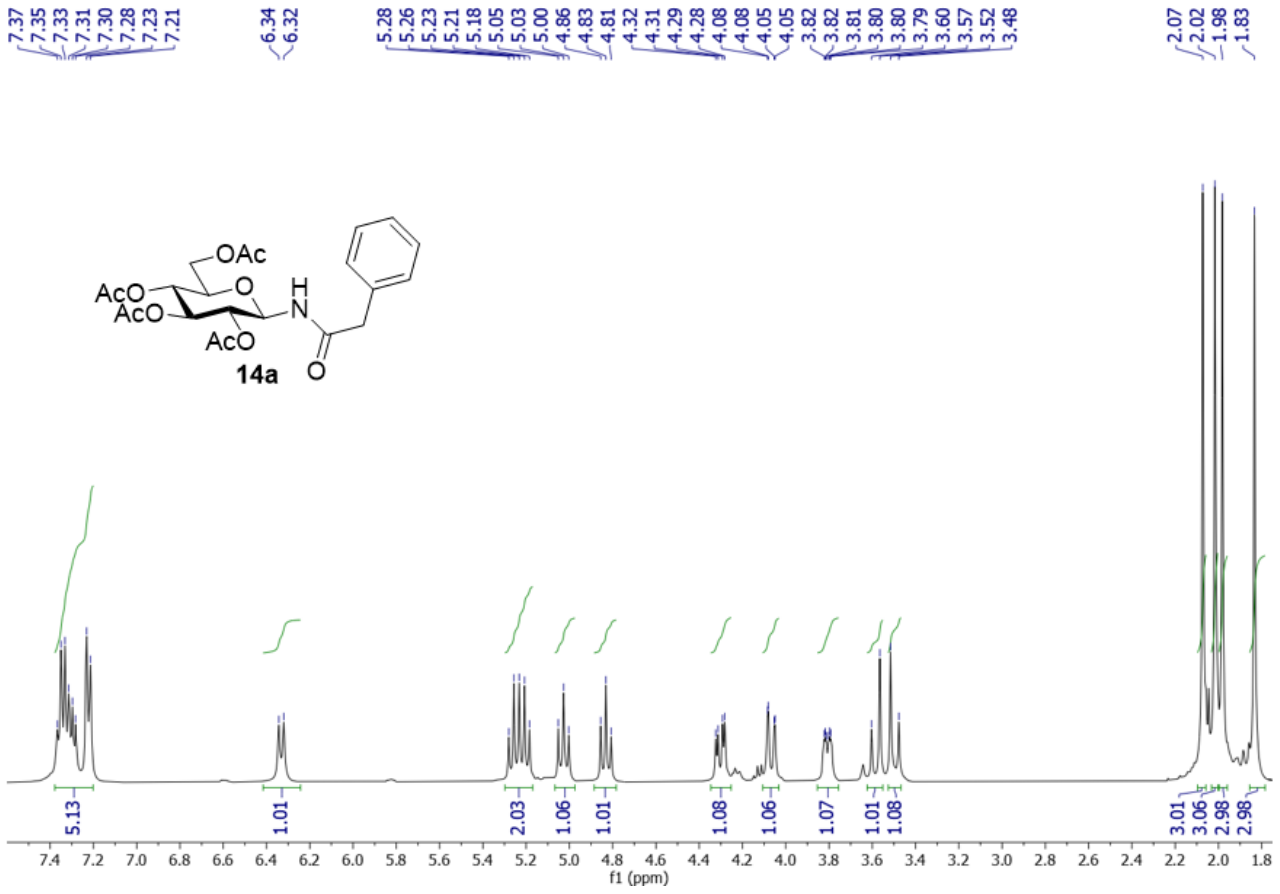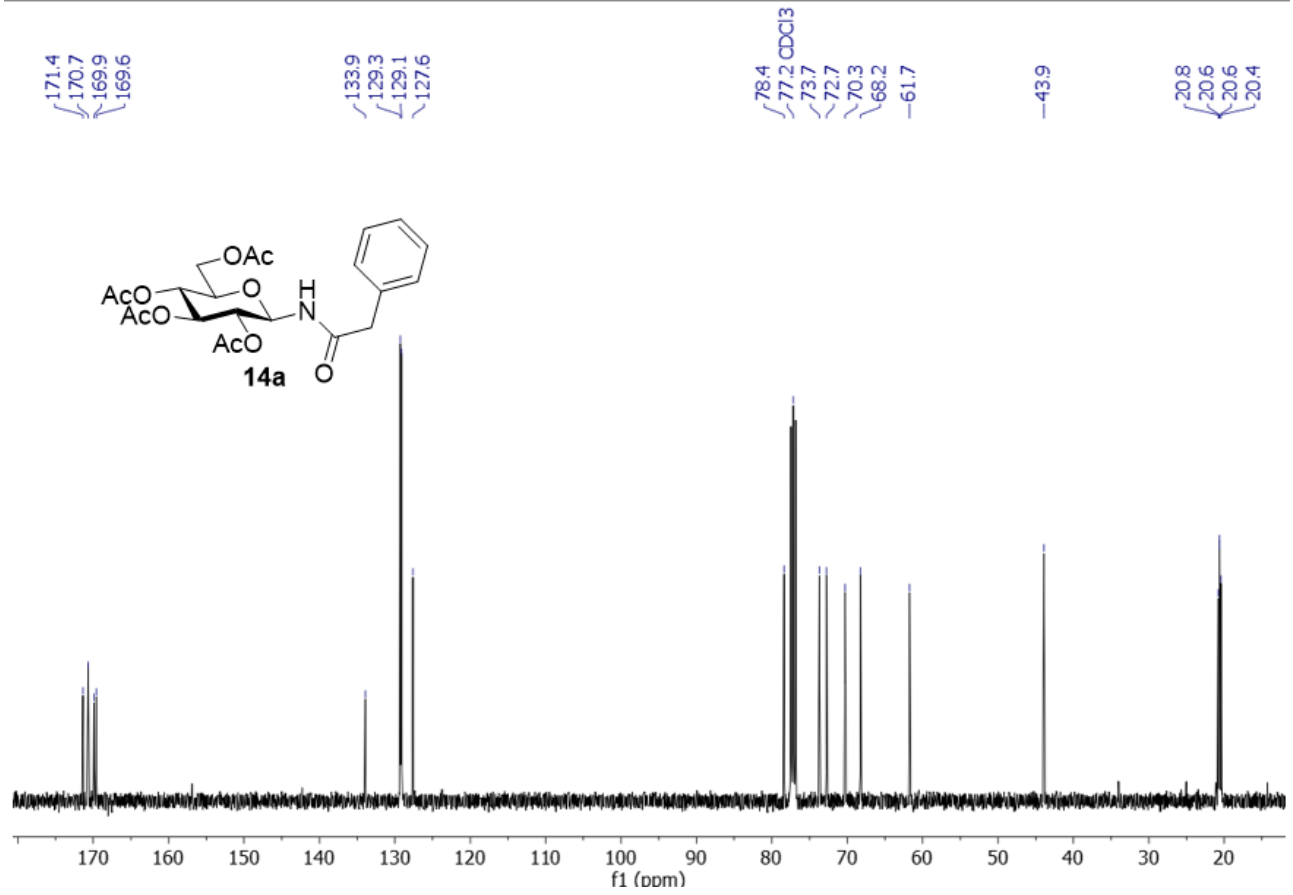

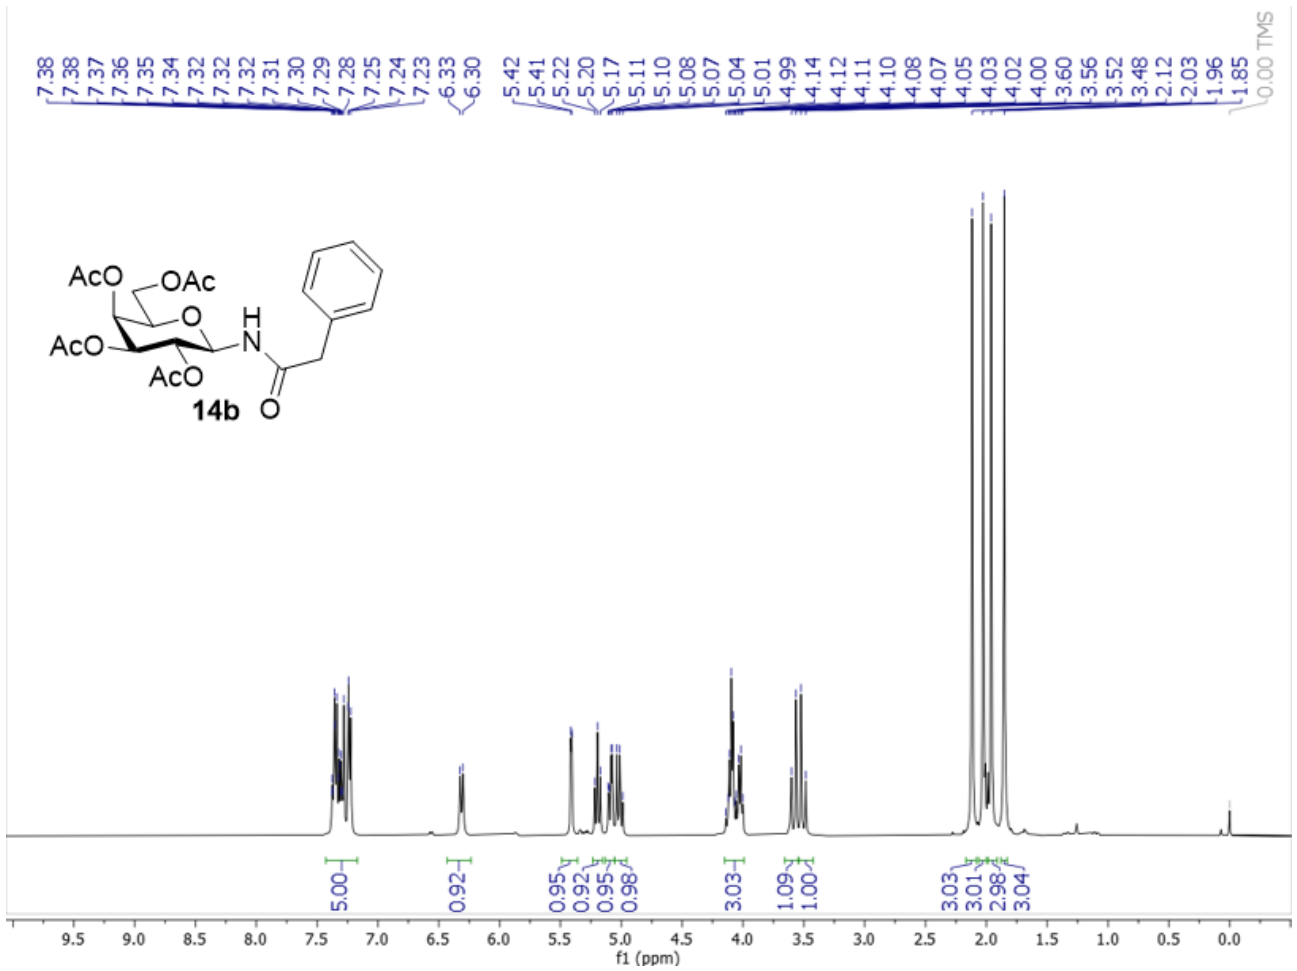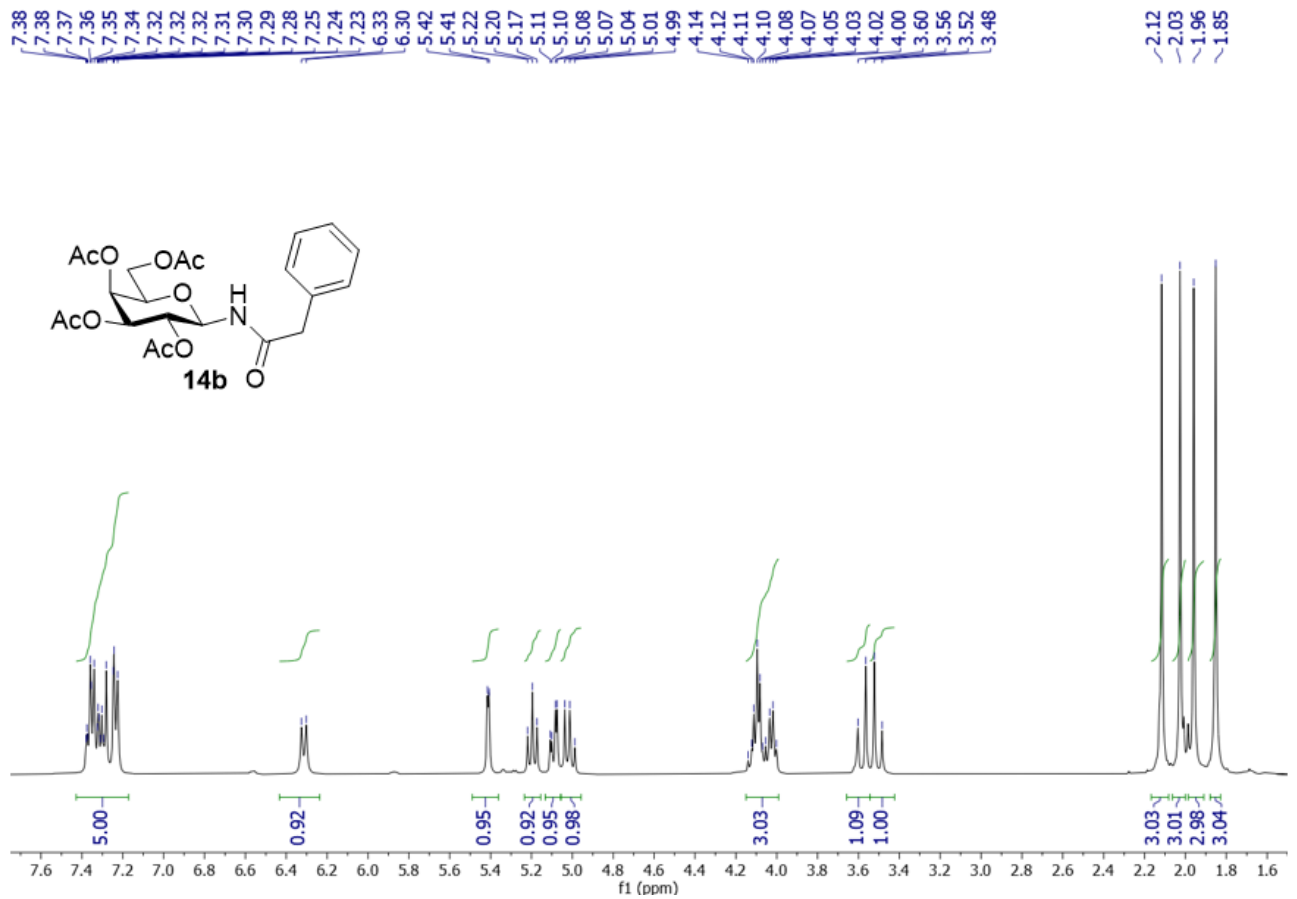



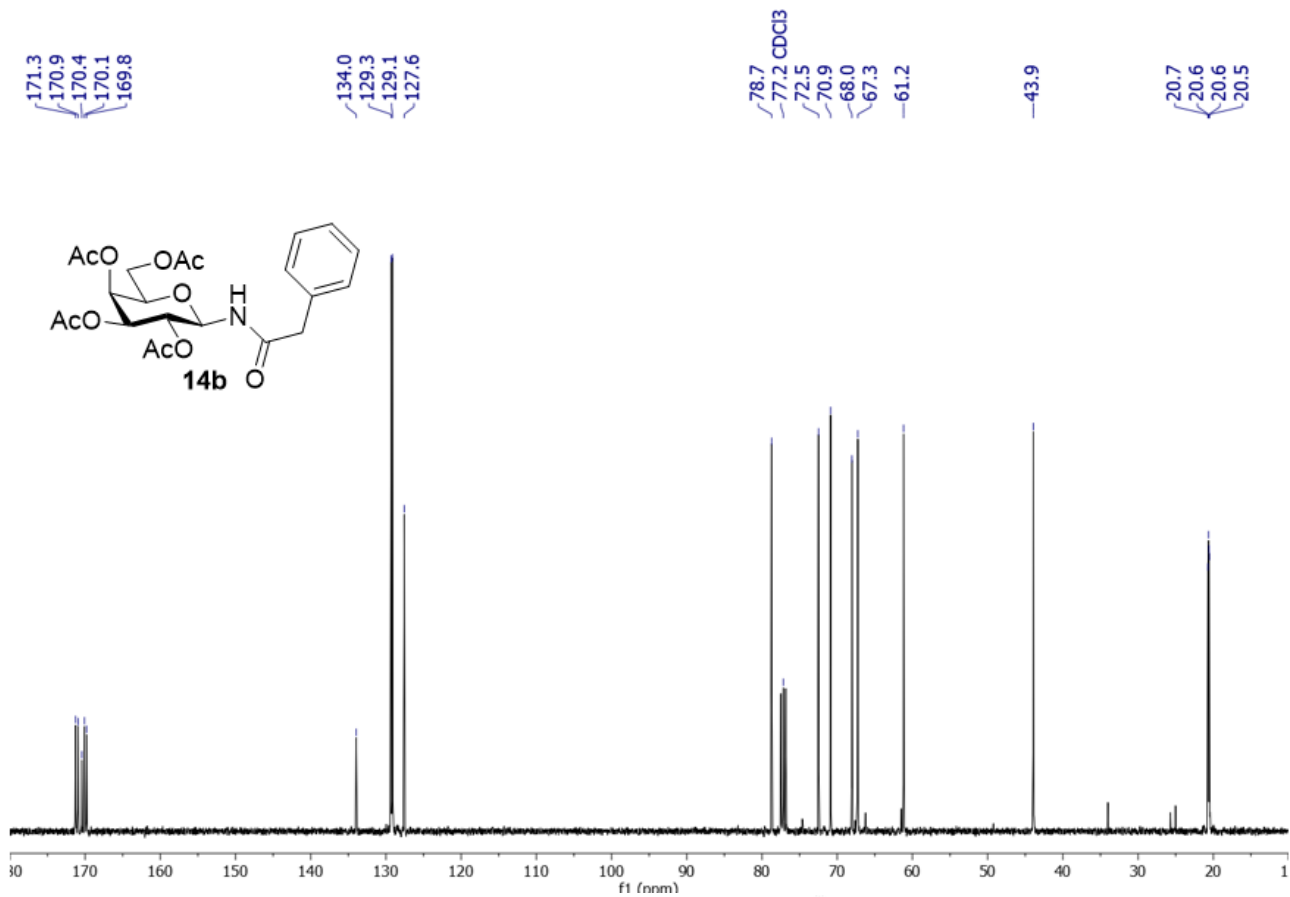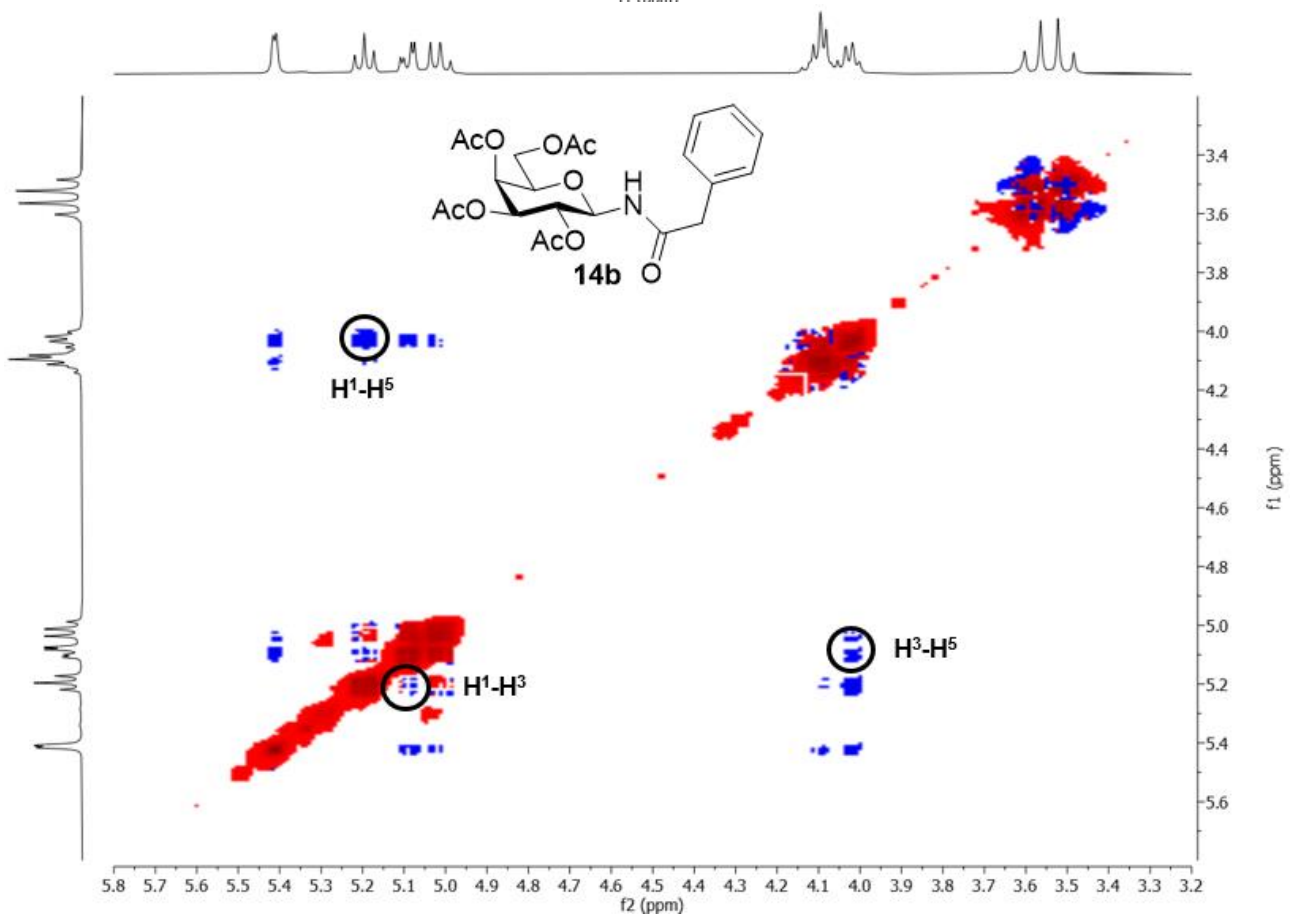

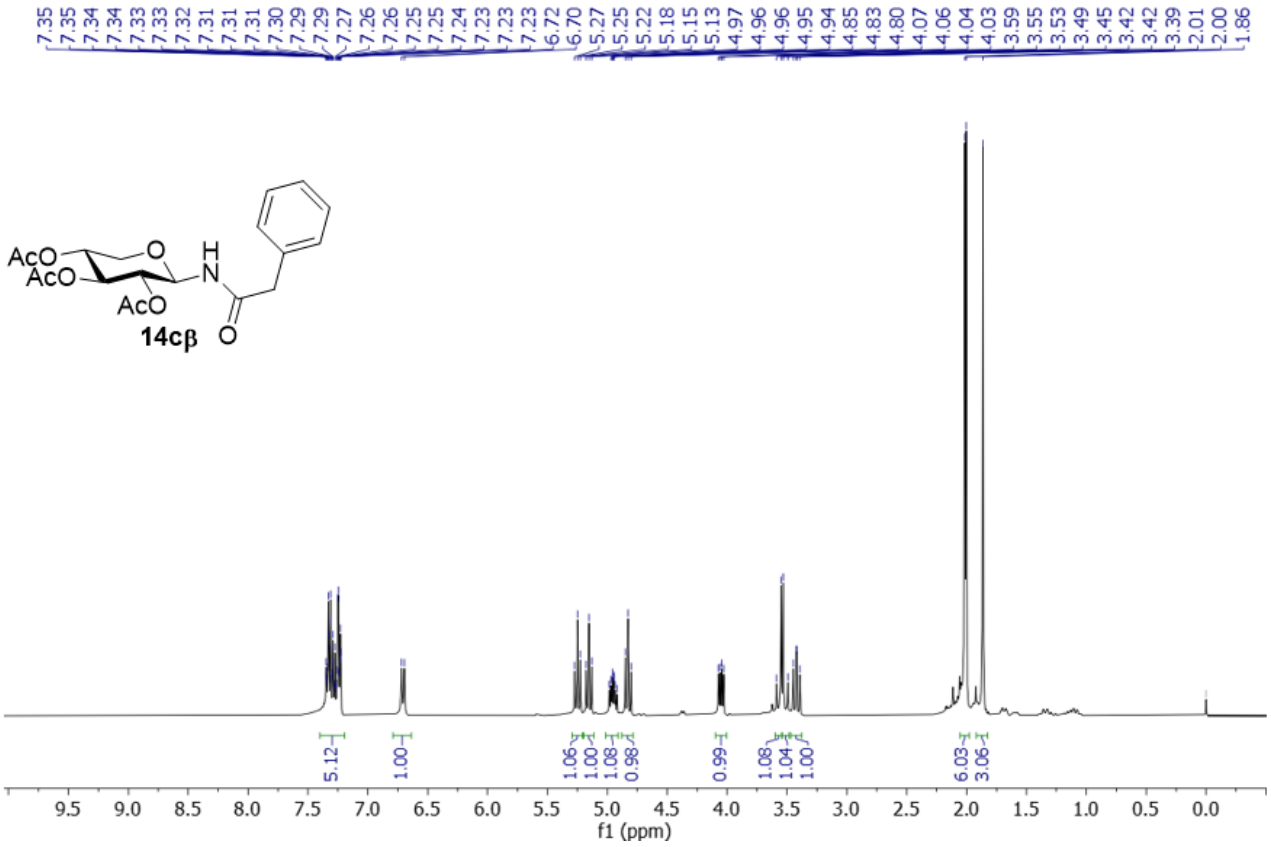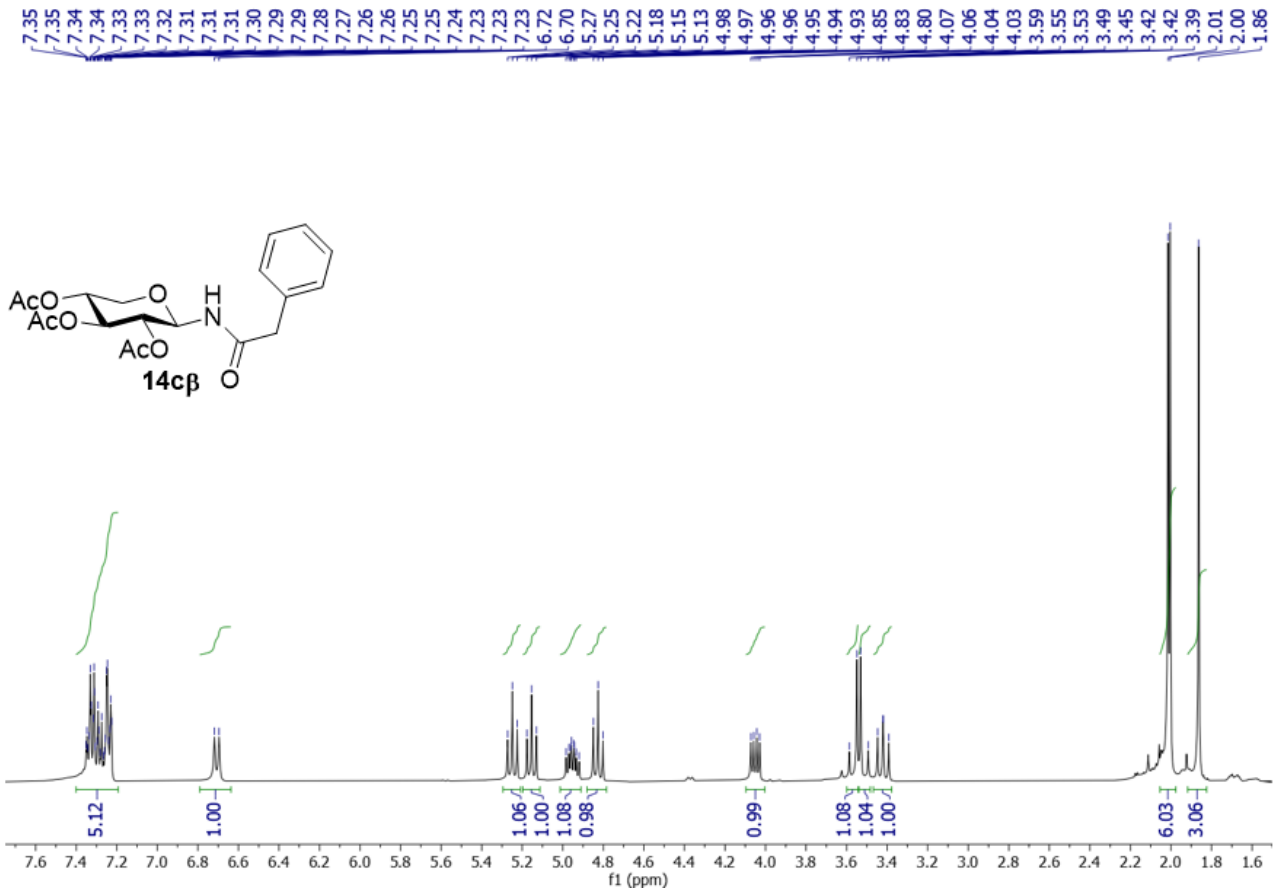

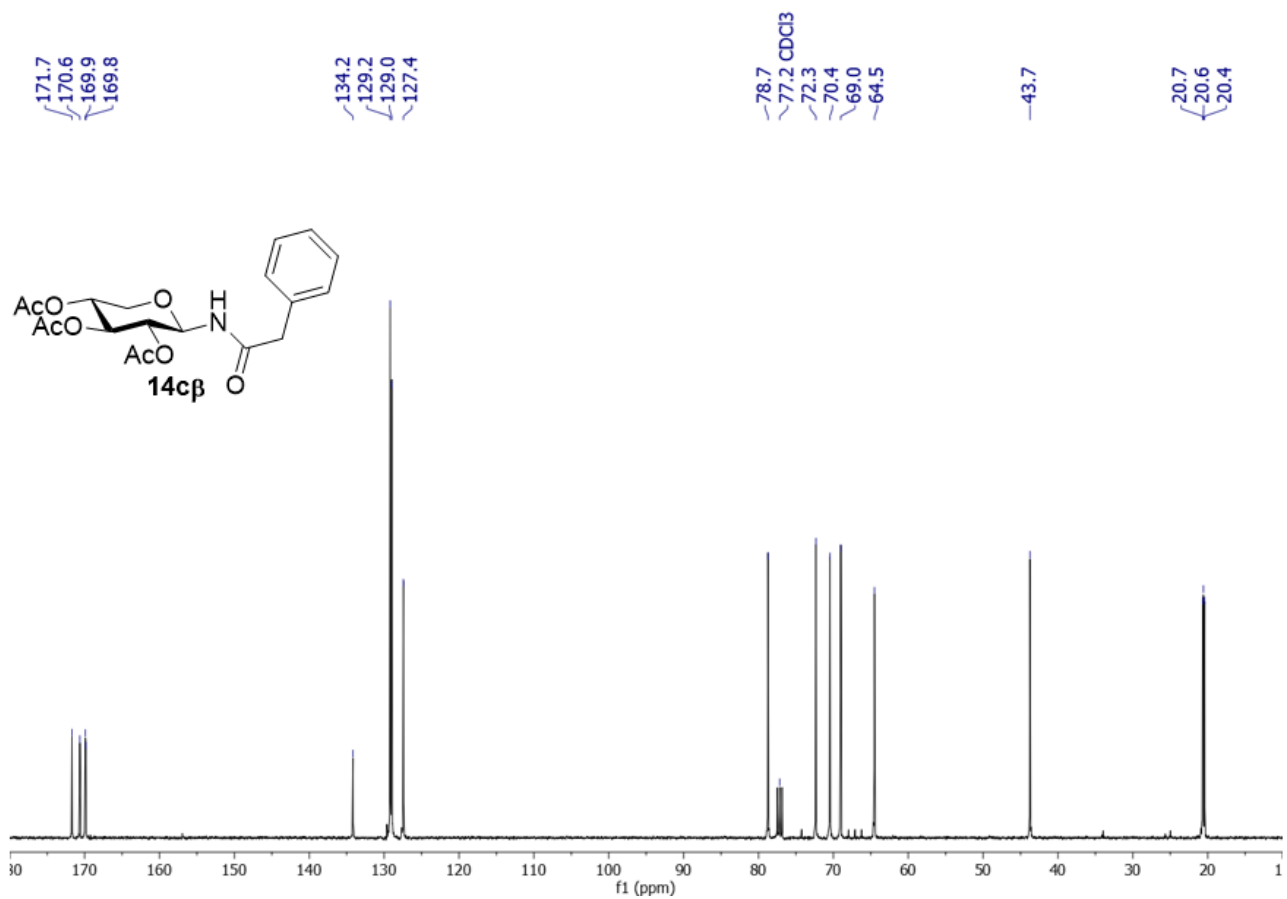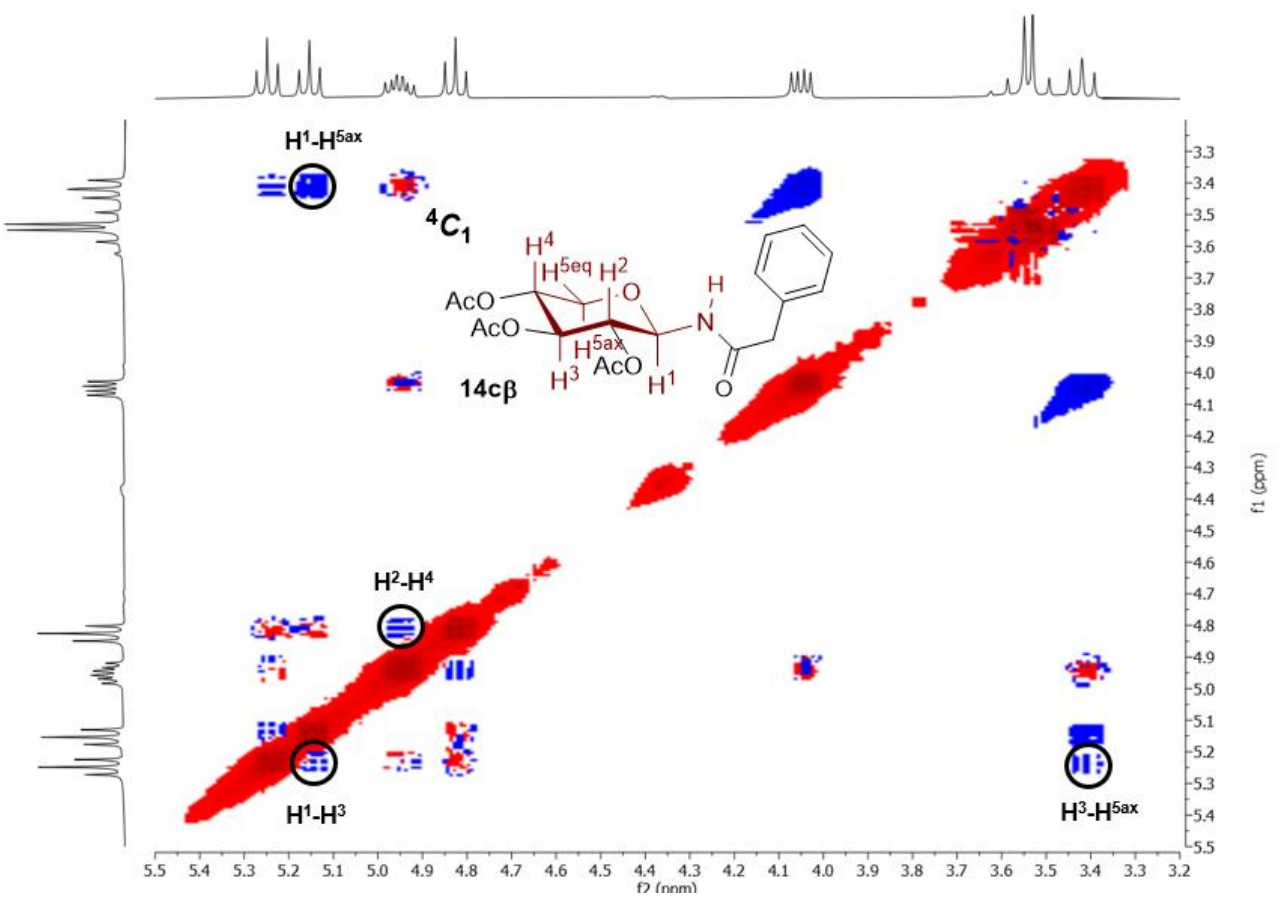

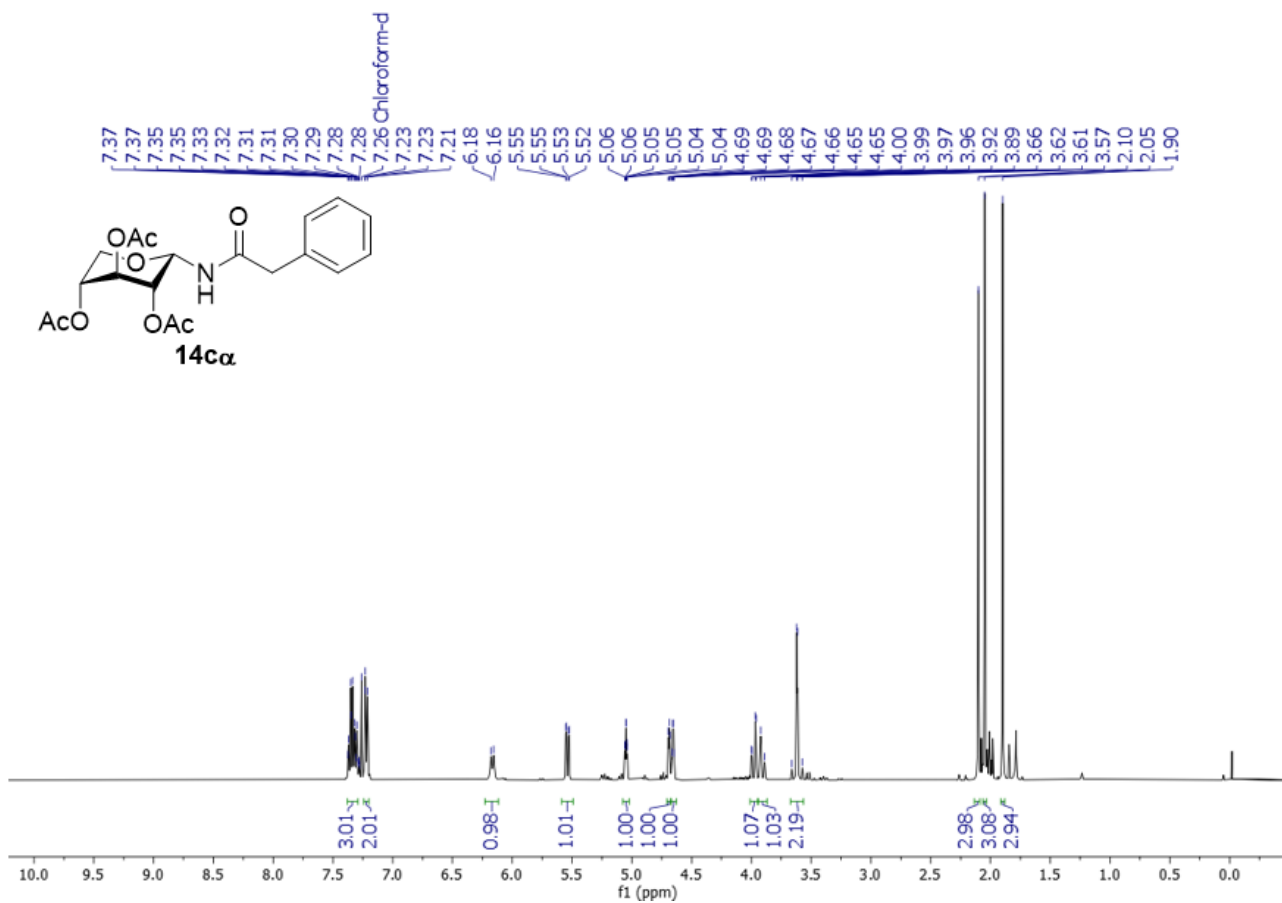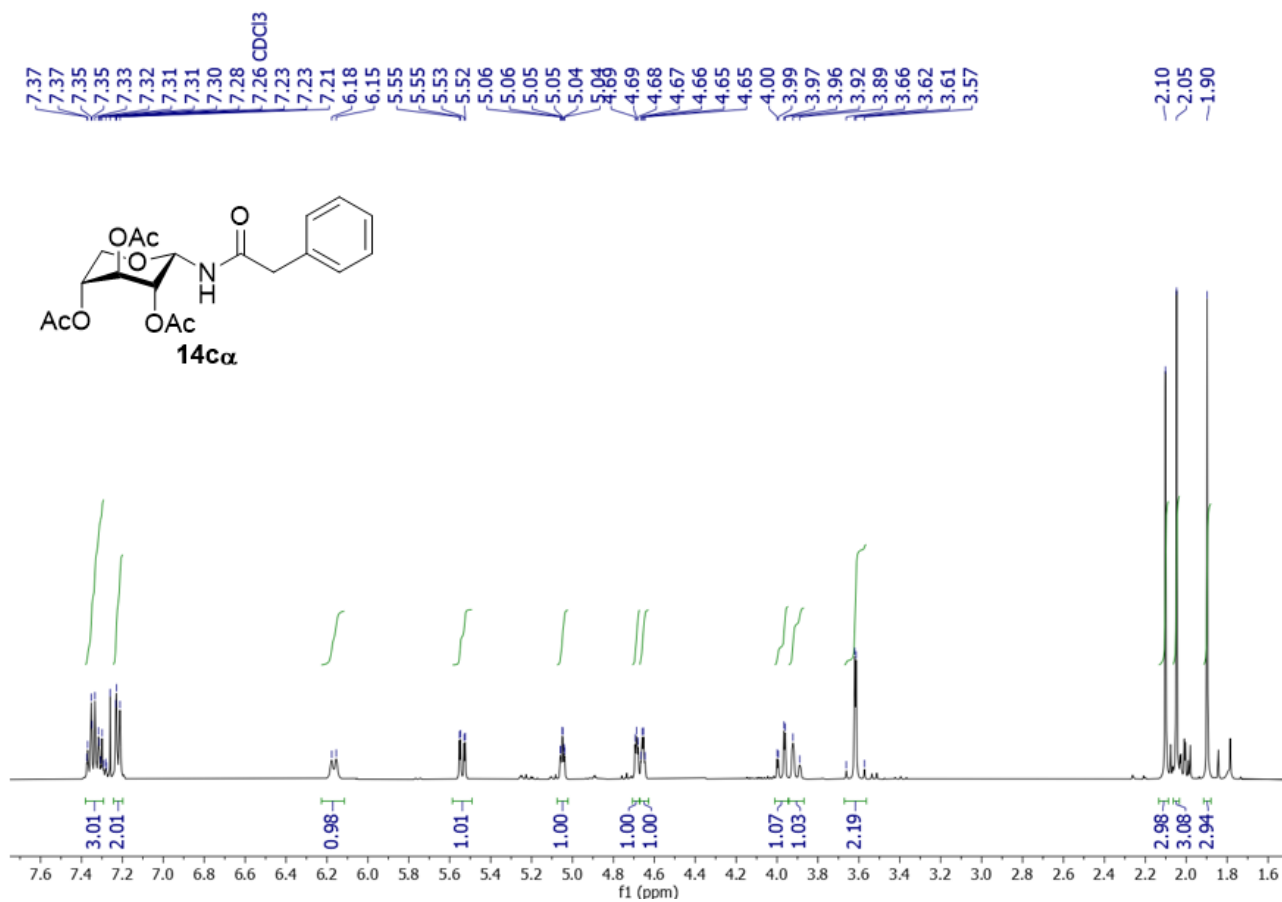

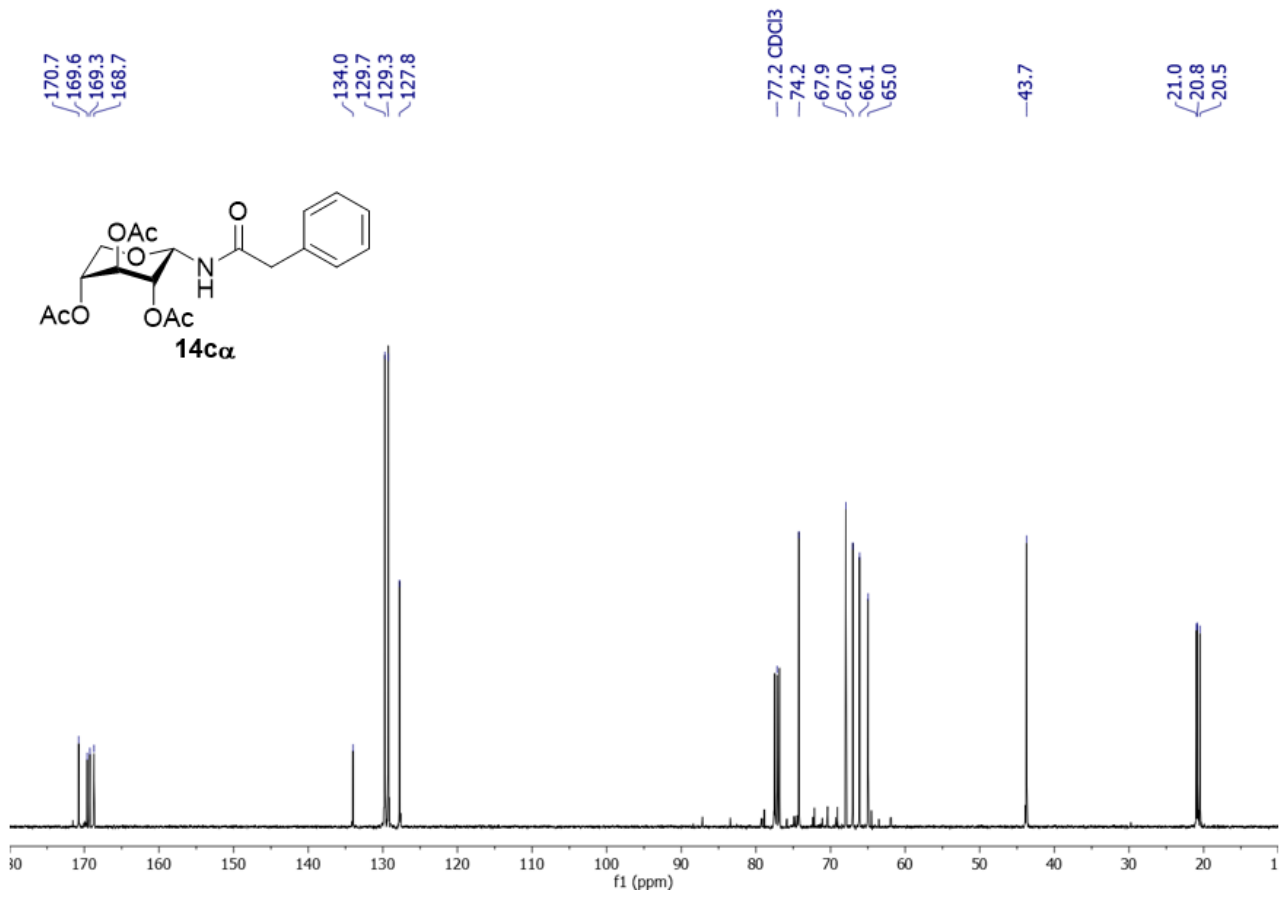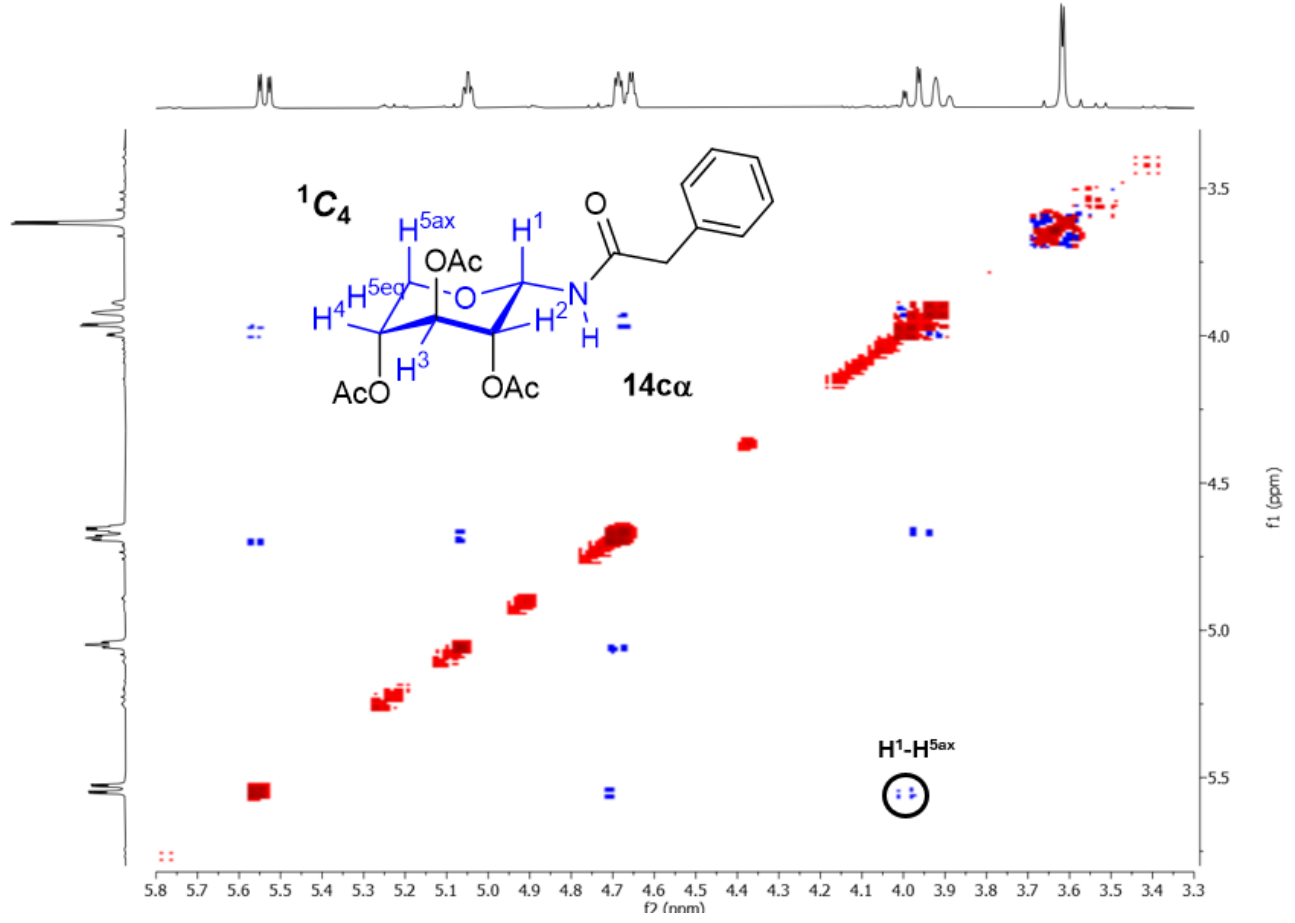

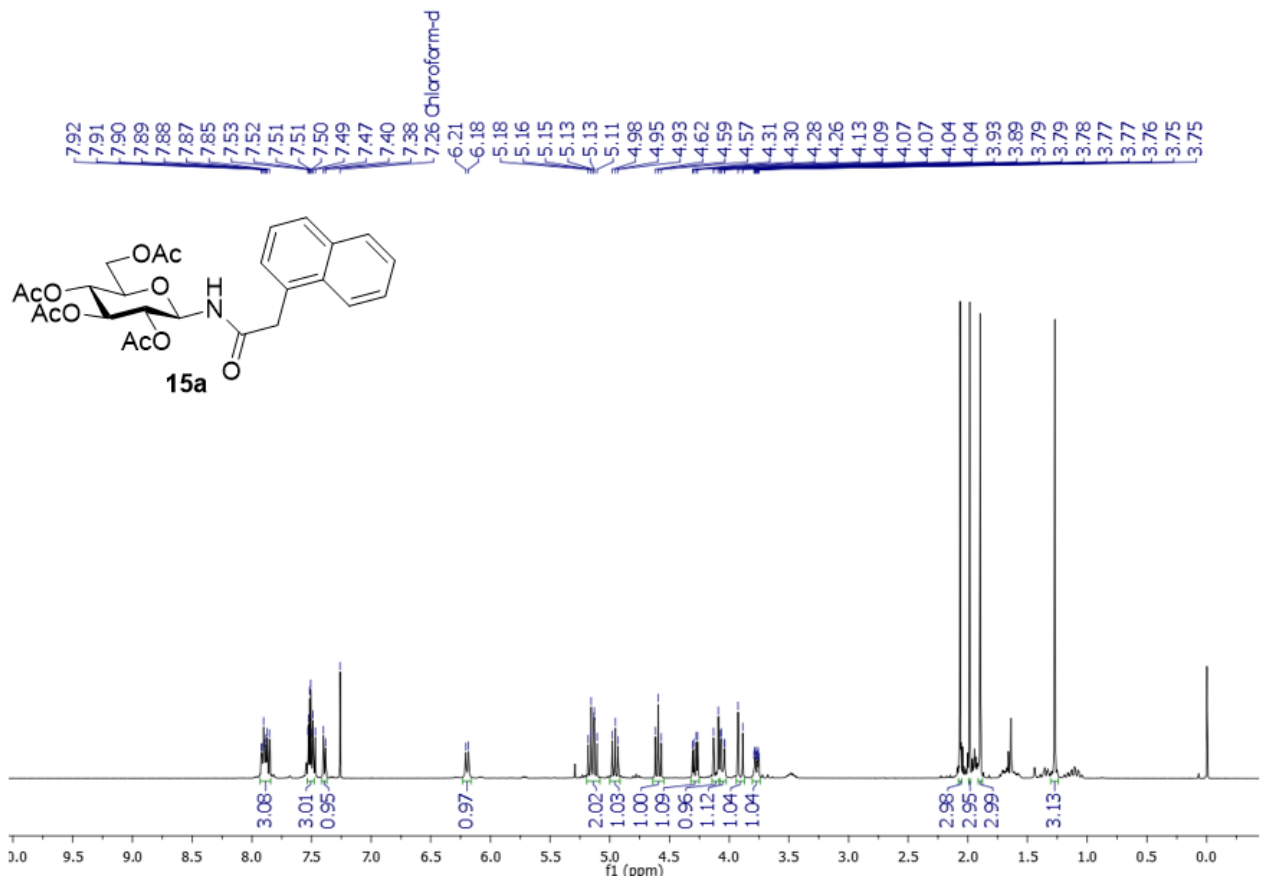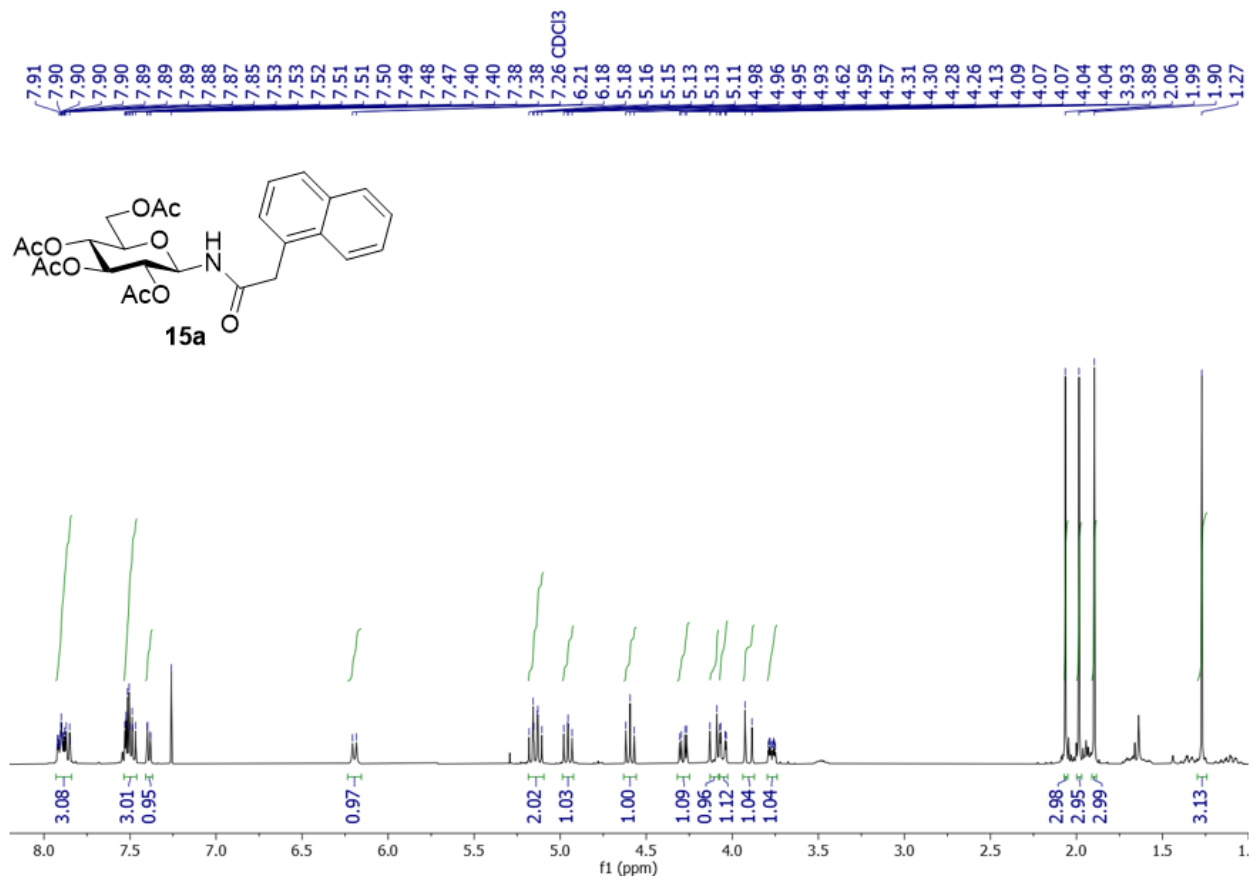

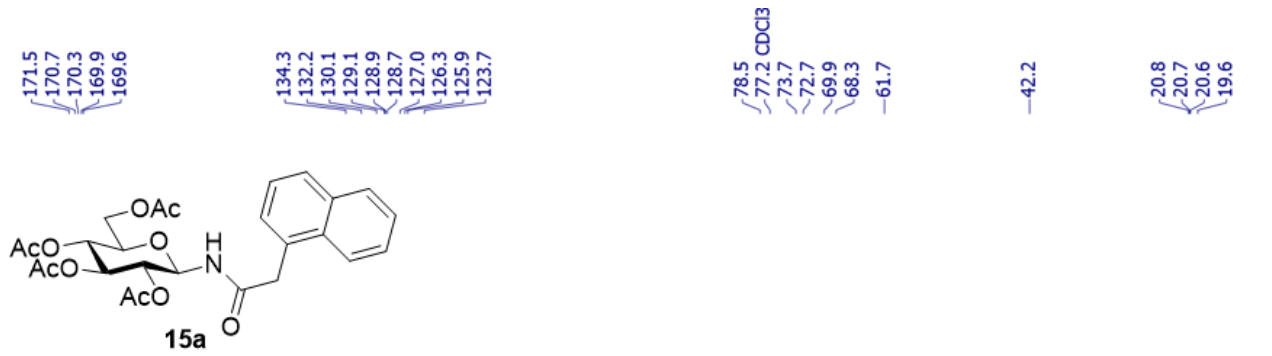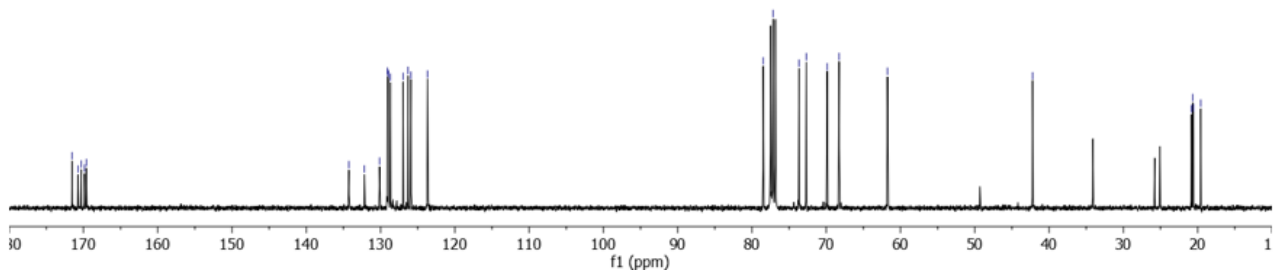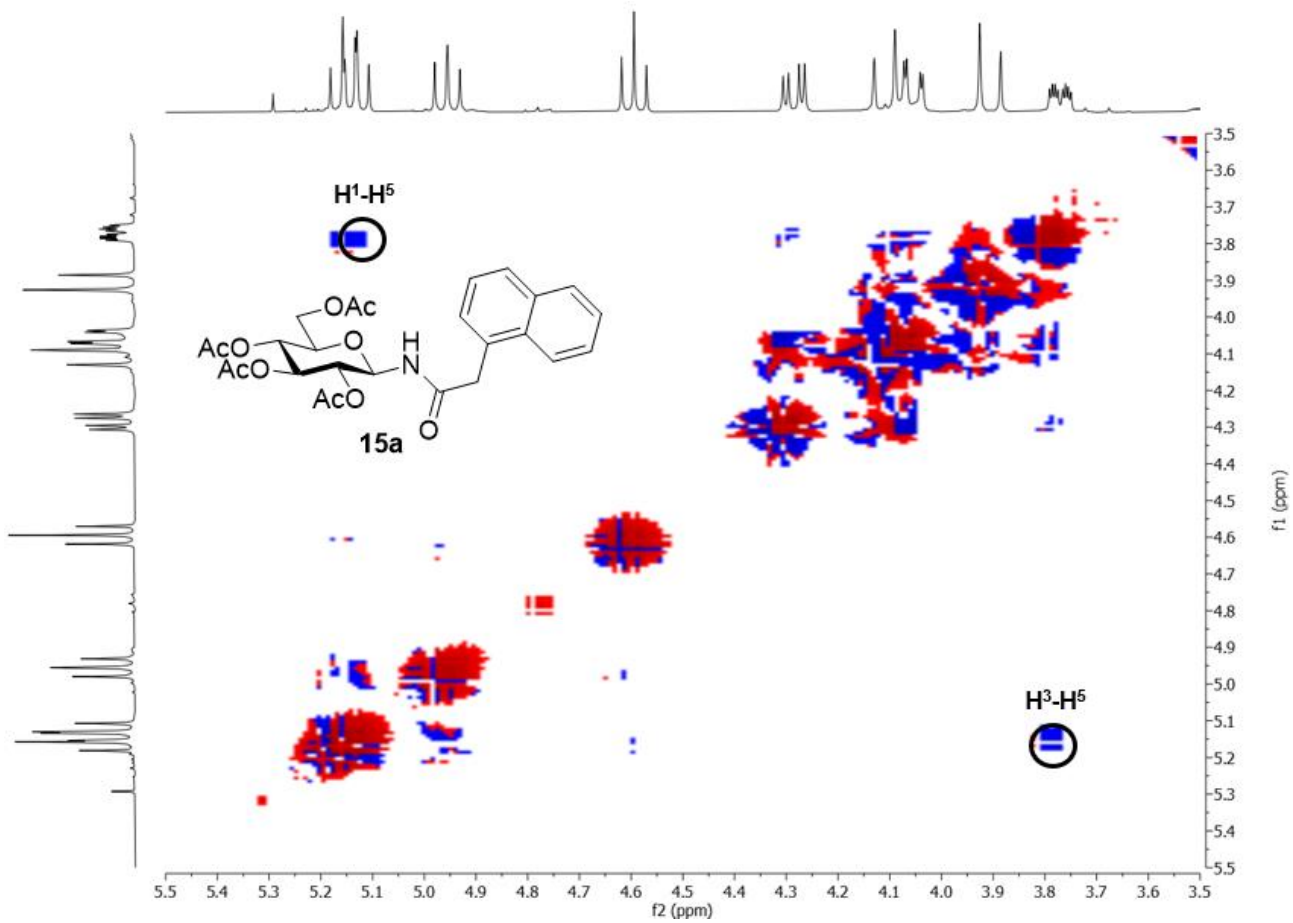

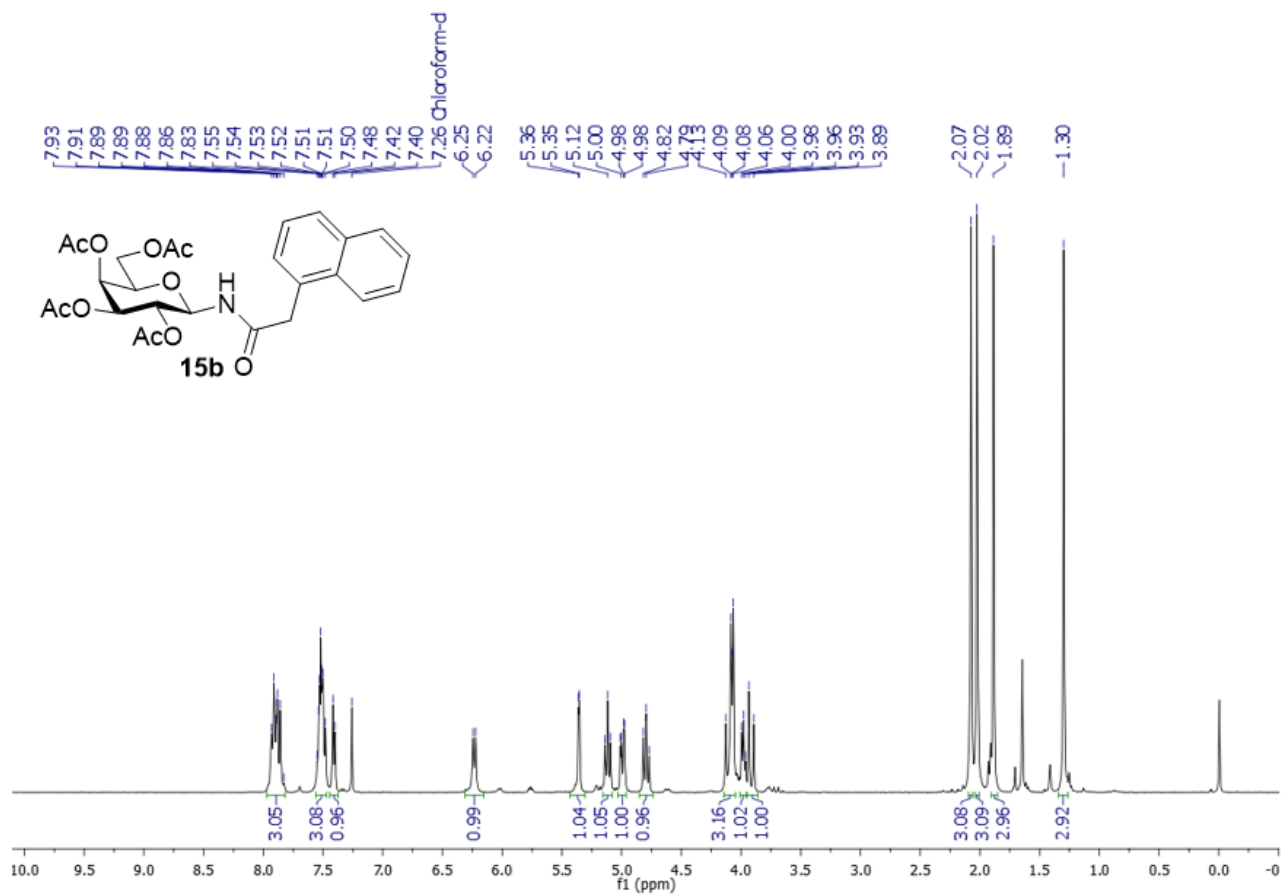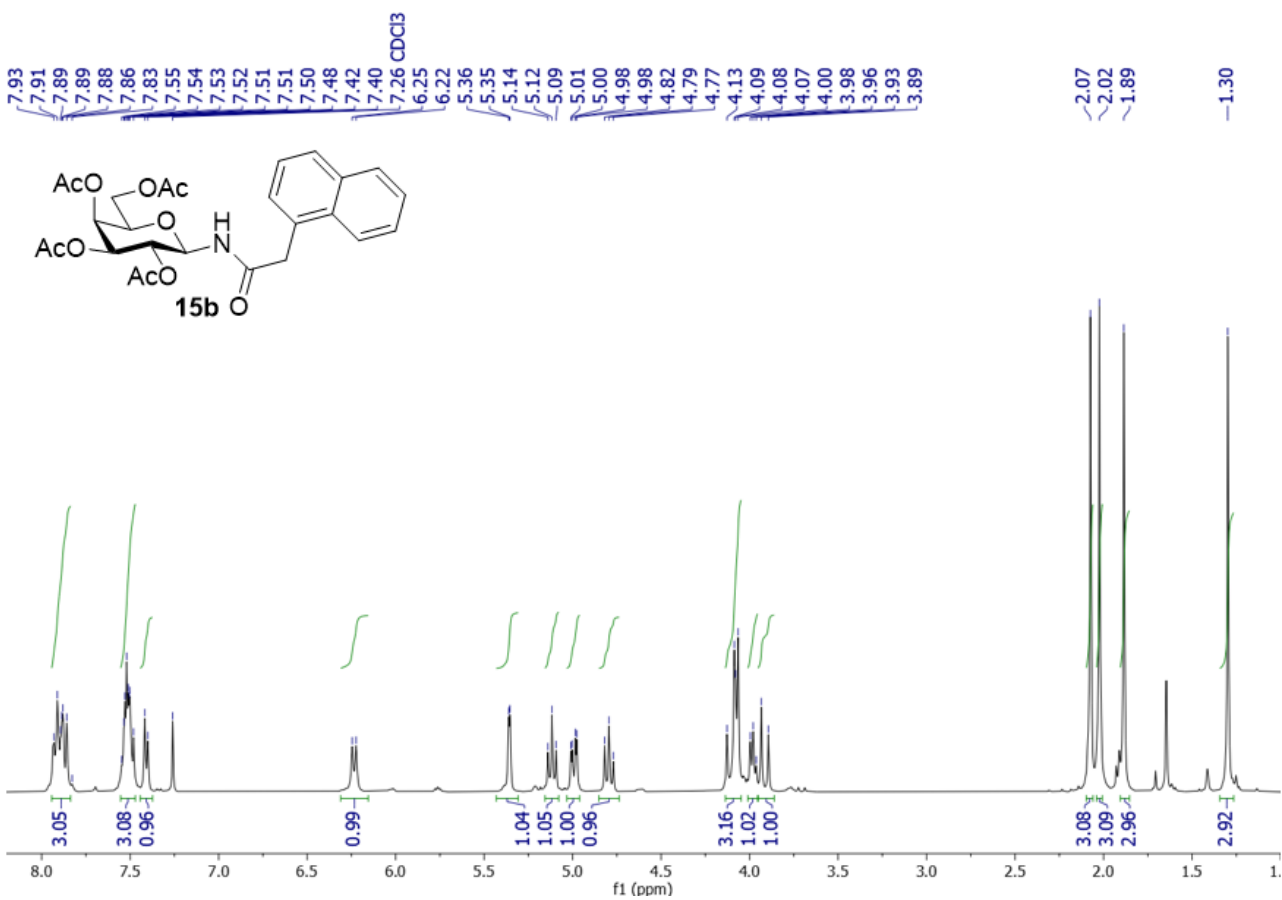



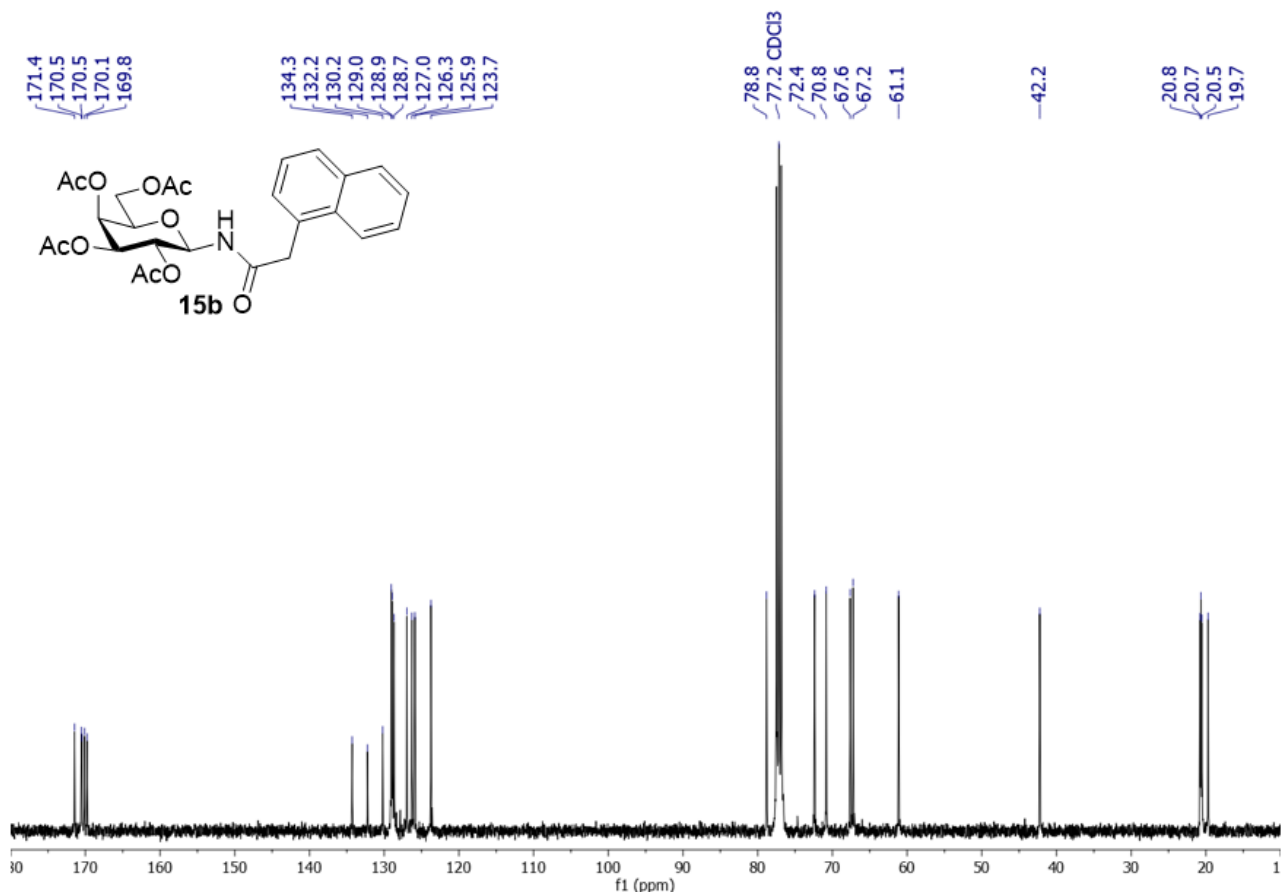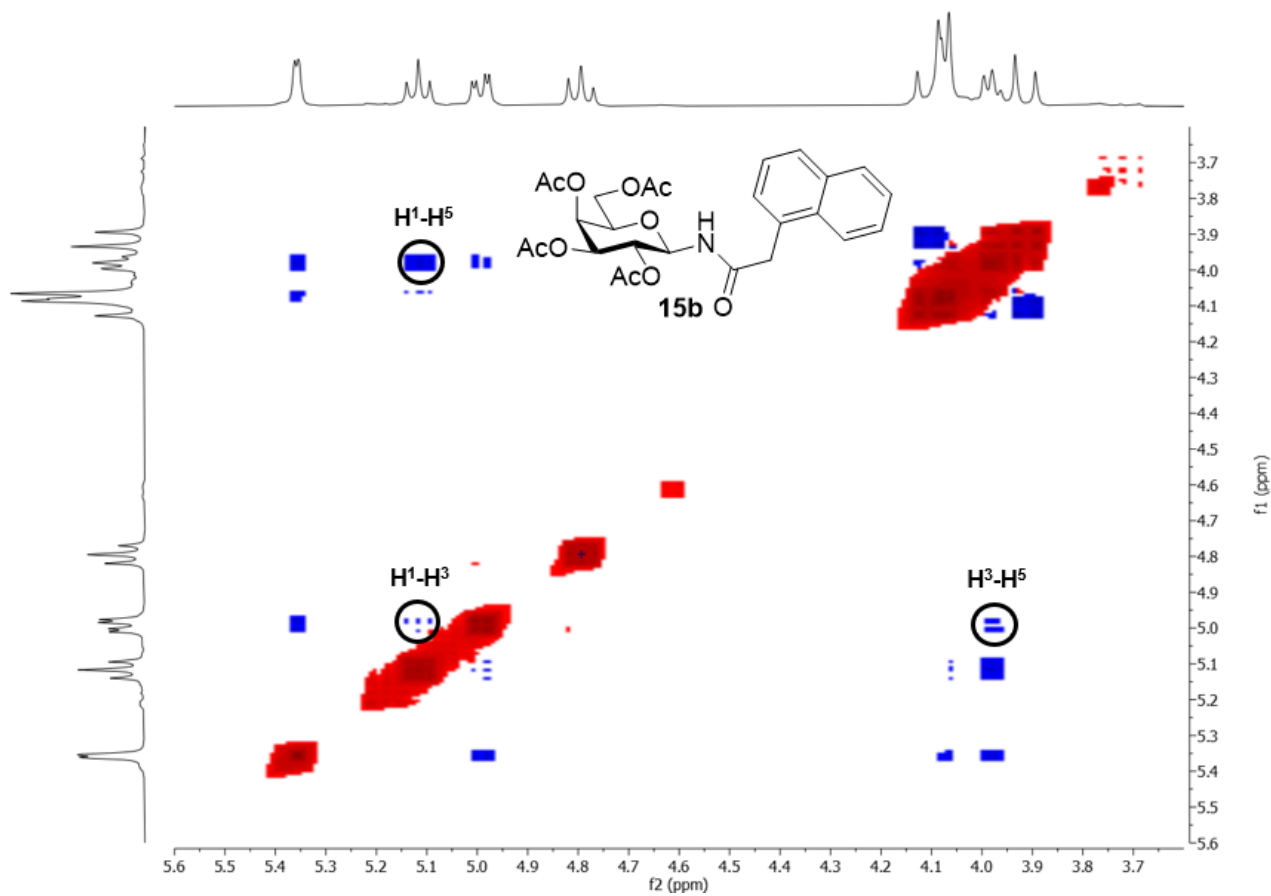

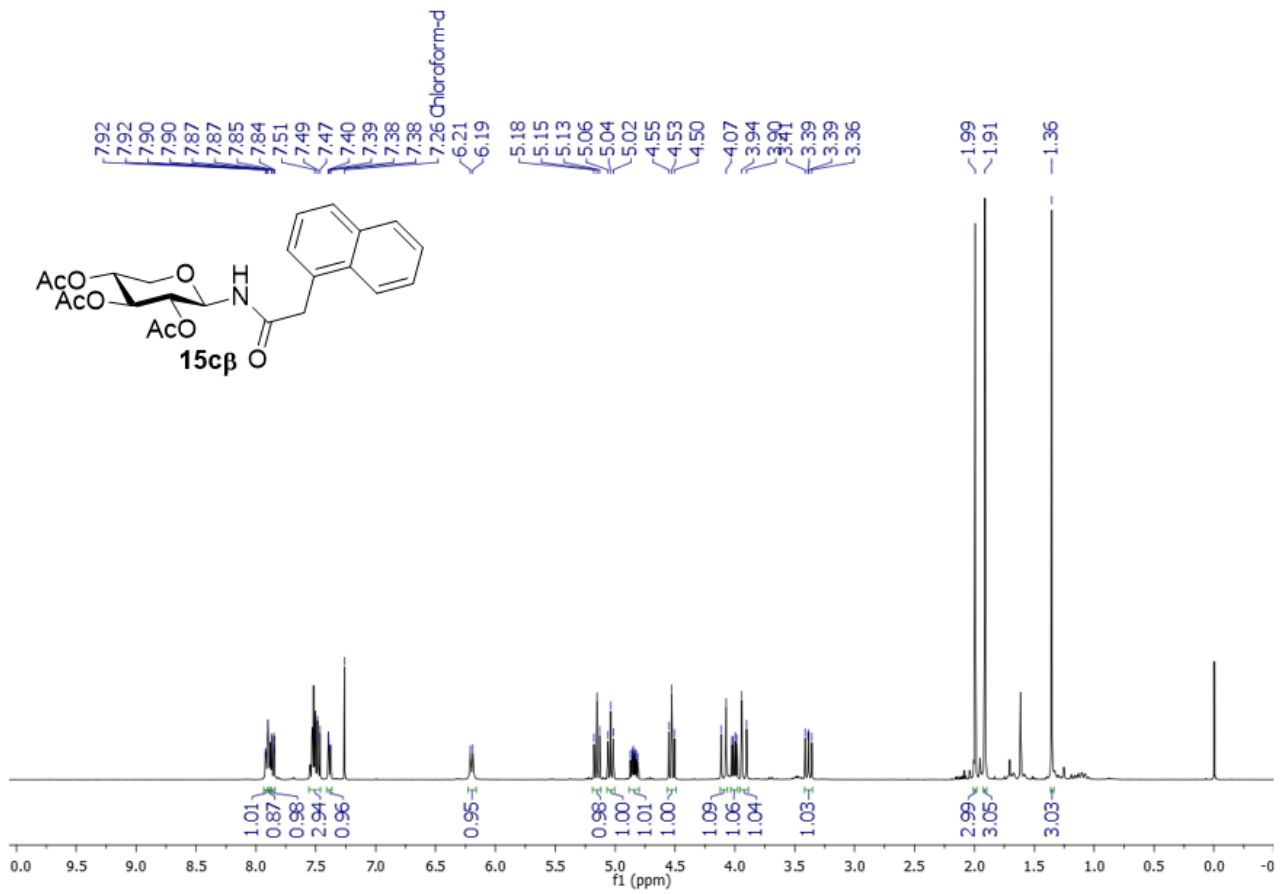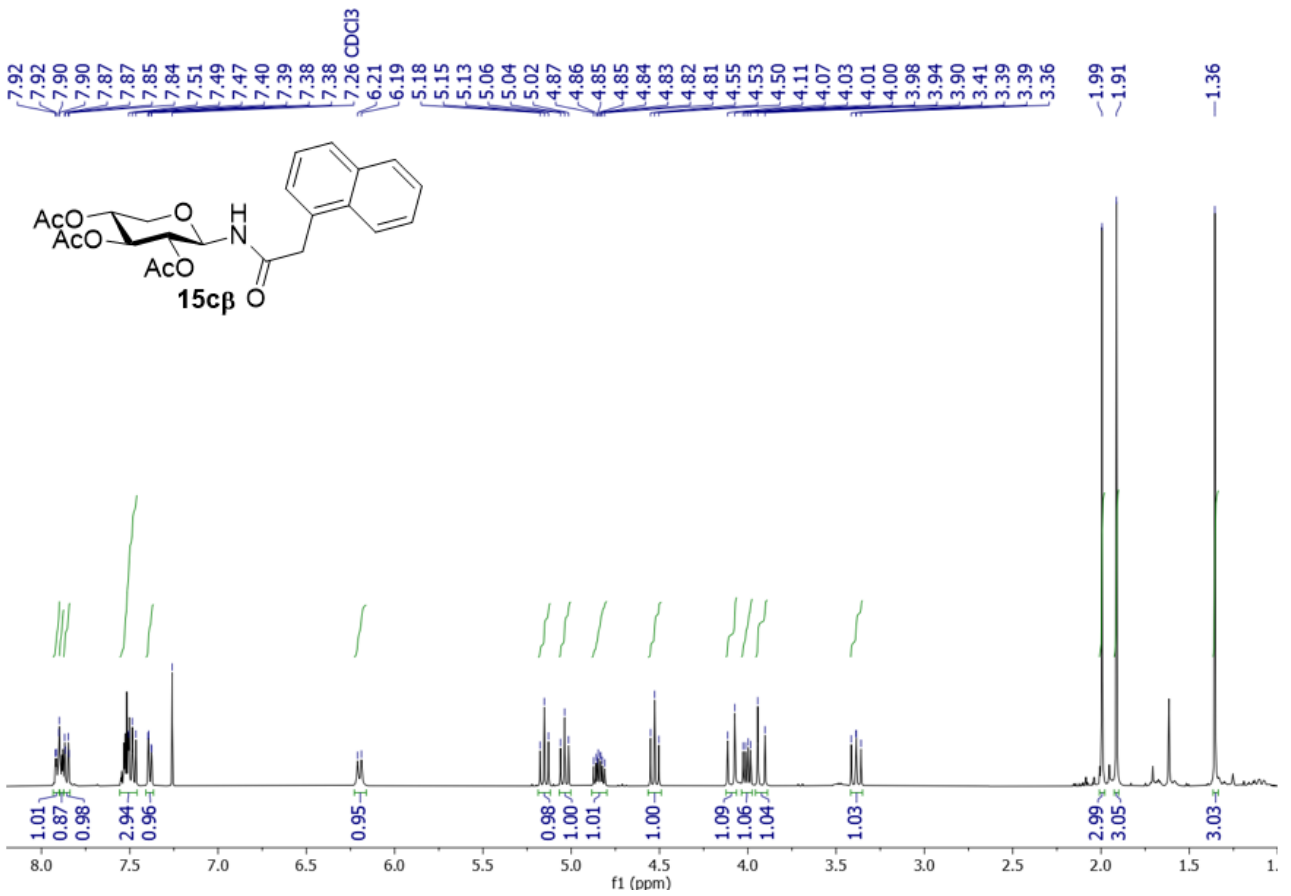

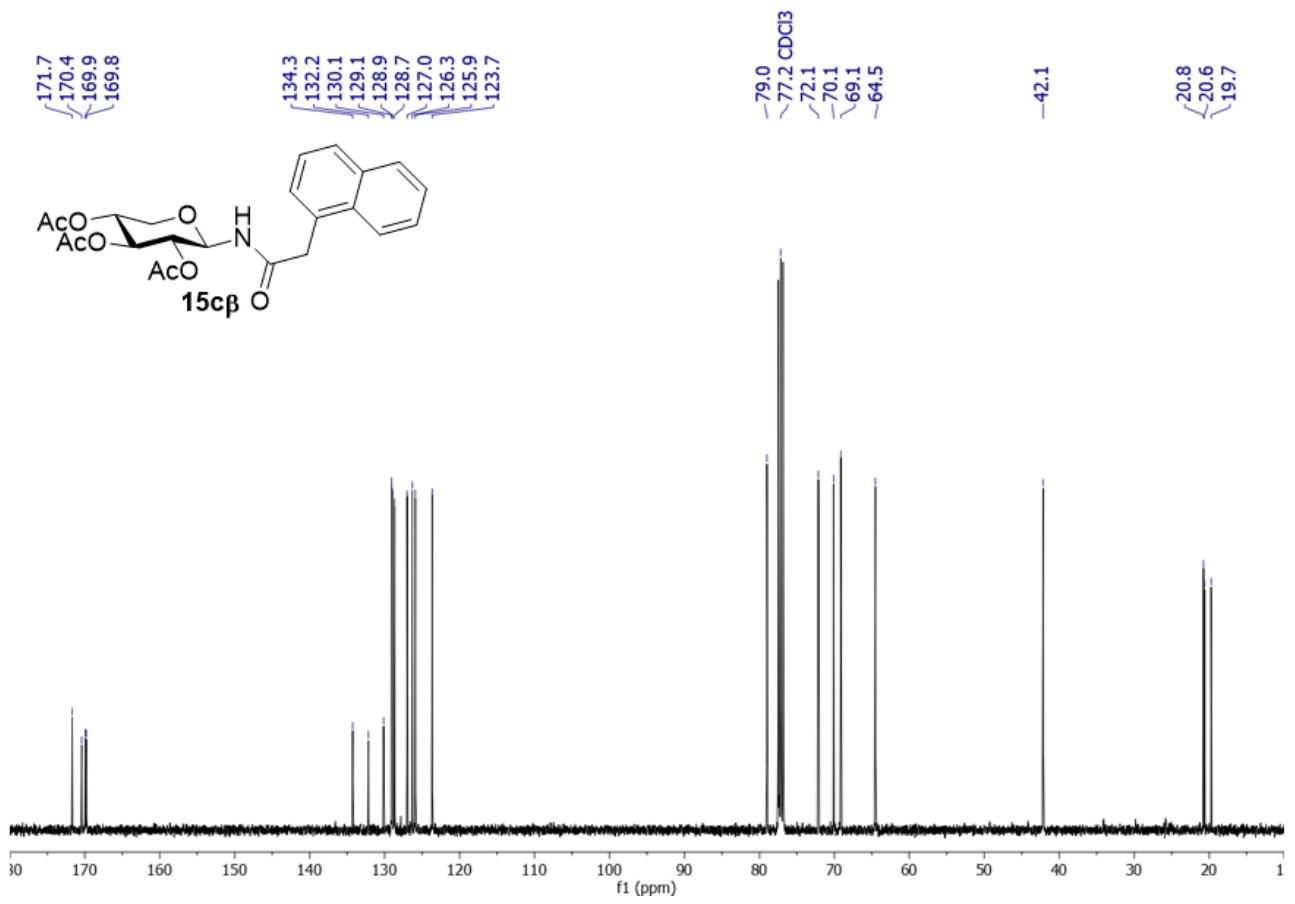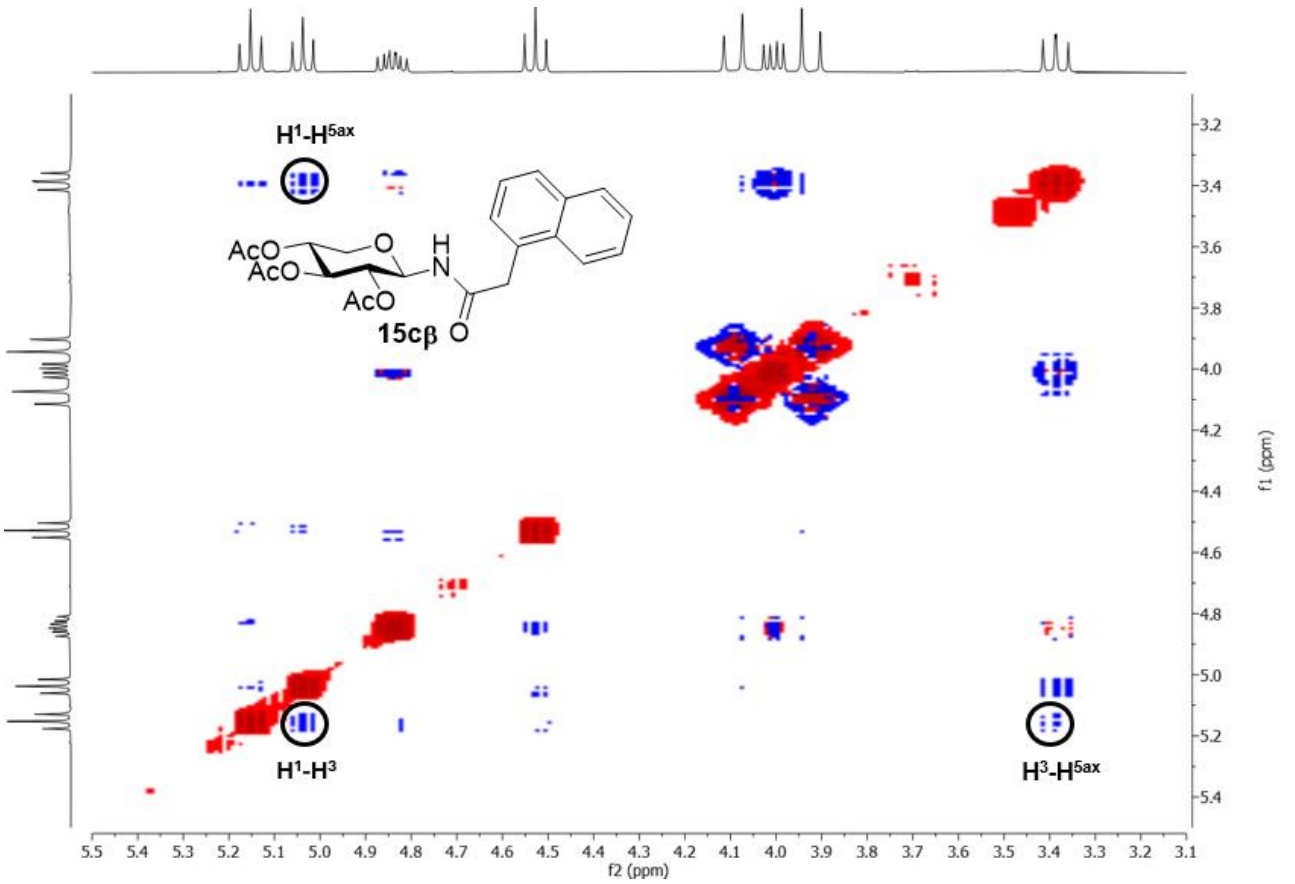

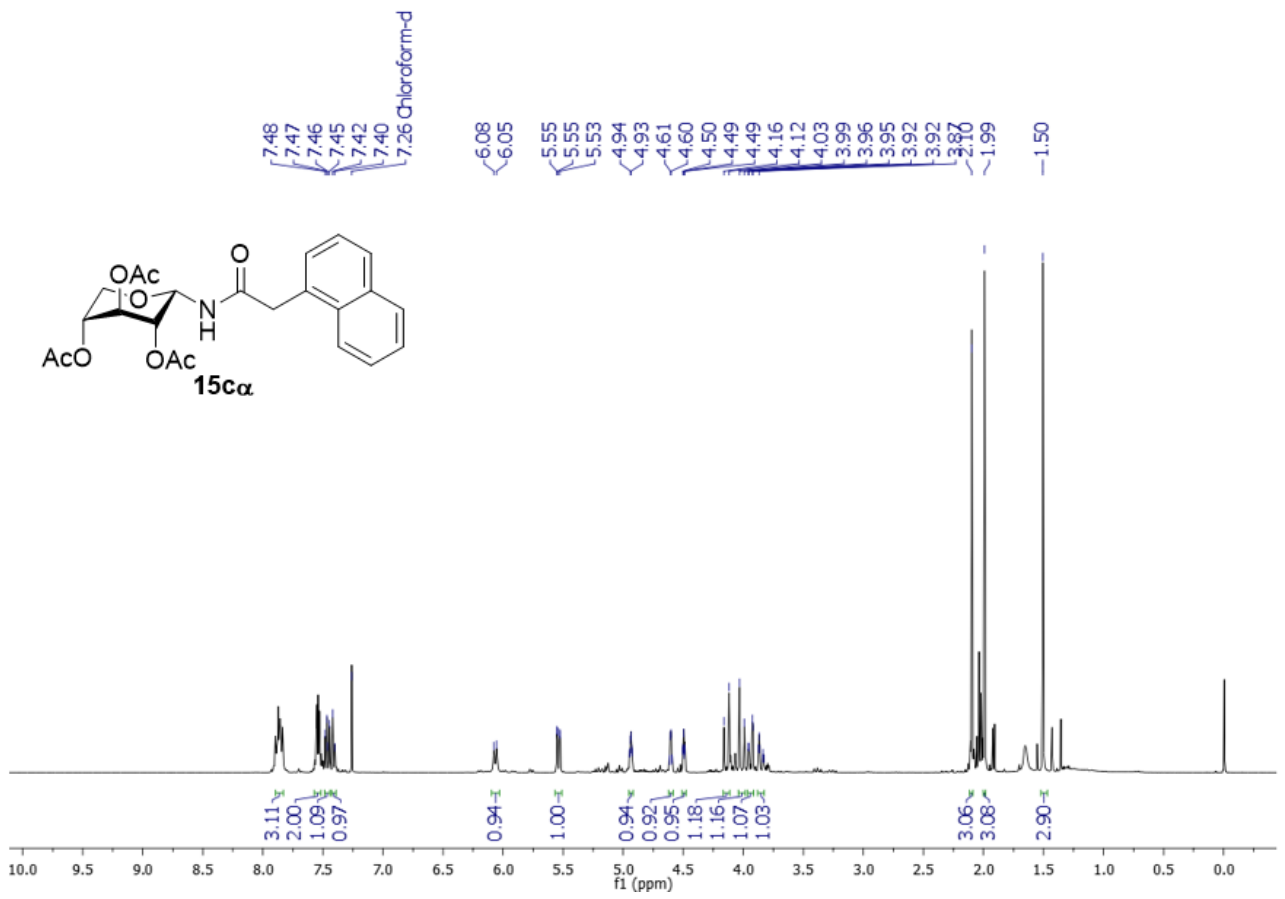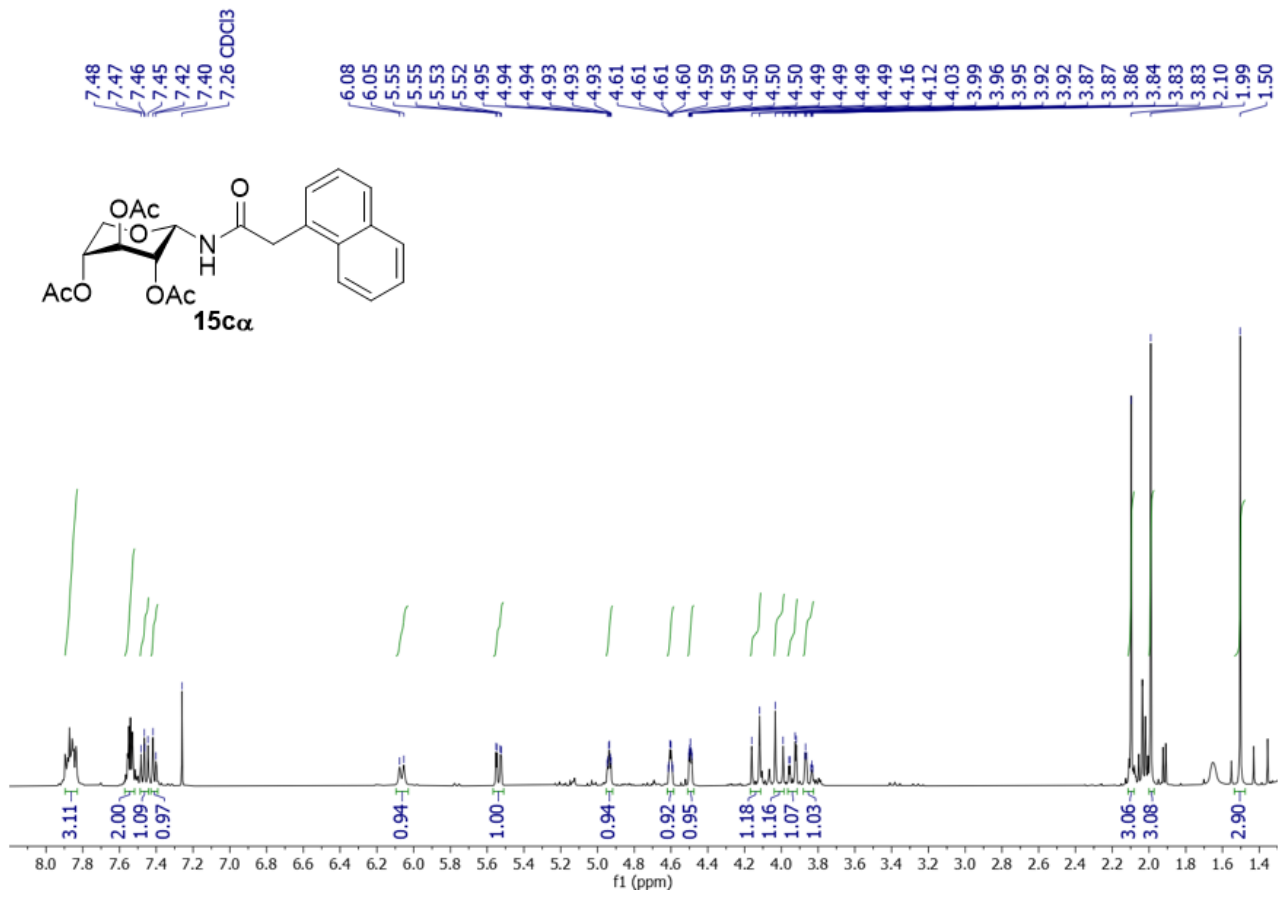

170.5  
169.6  
168.9  
168.6

134.1  
132.0  
130.2  
129.0  
129.0  
128.9  
127.4  
126.6  
125.8  
123.5

-77.2 CDCl3  
-74.3  
-67.9  
-66.9  
-66.0  
-65.1

-41.8

21.0  
20.9  
19.9

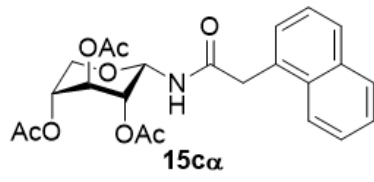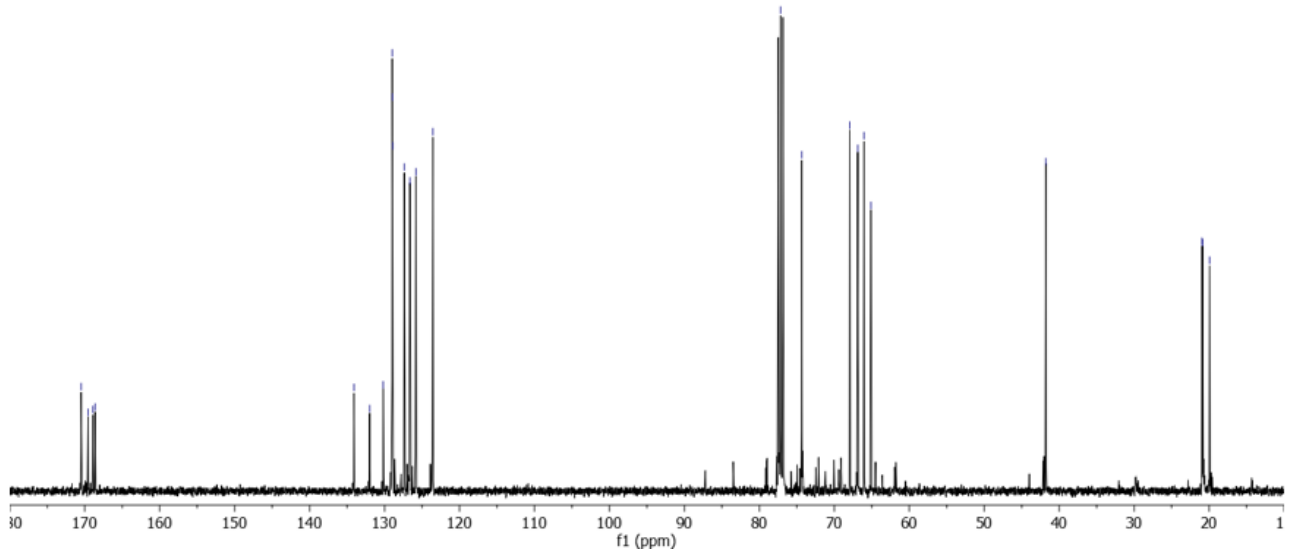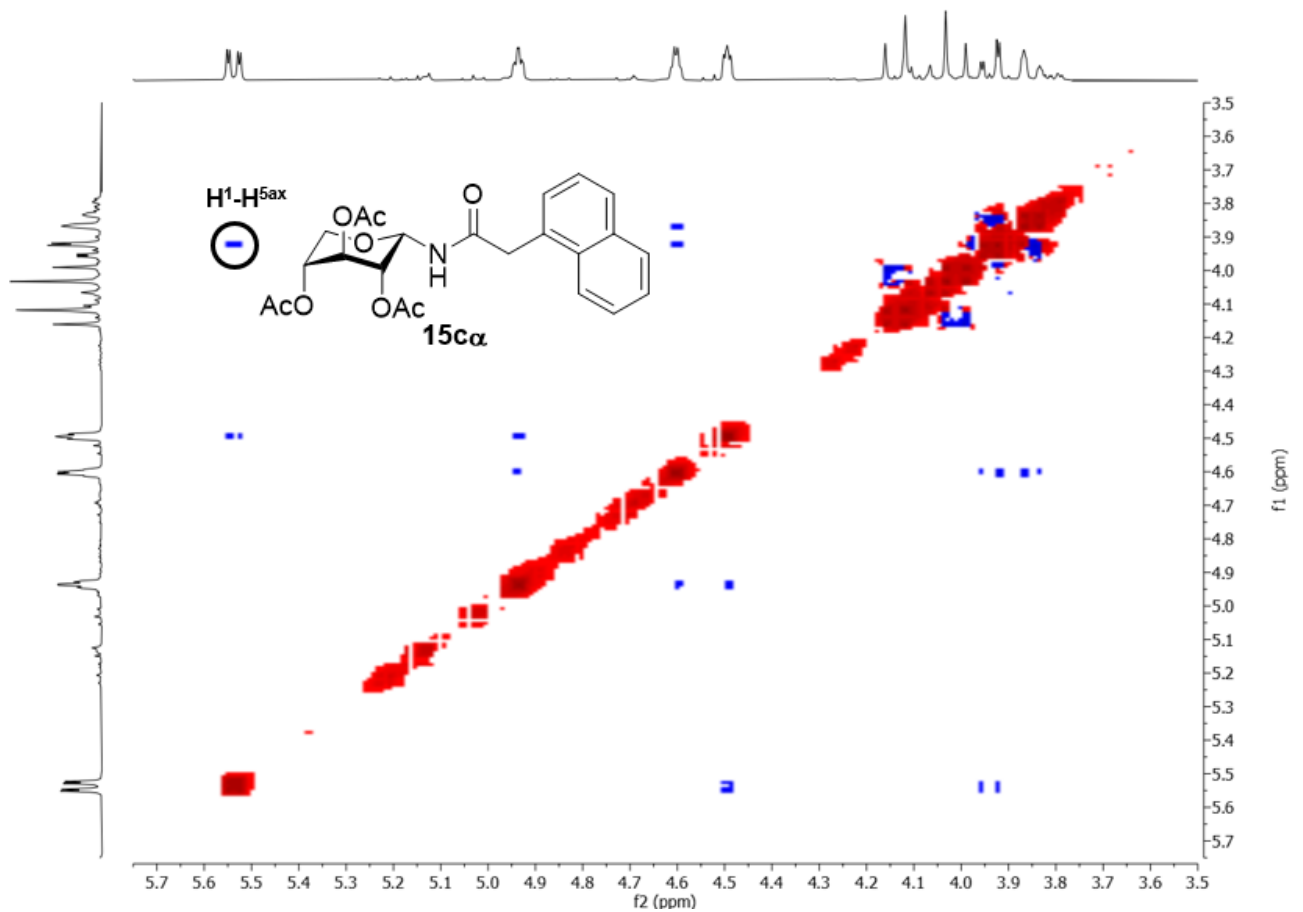

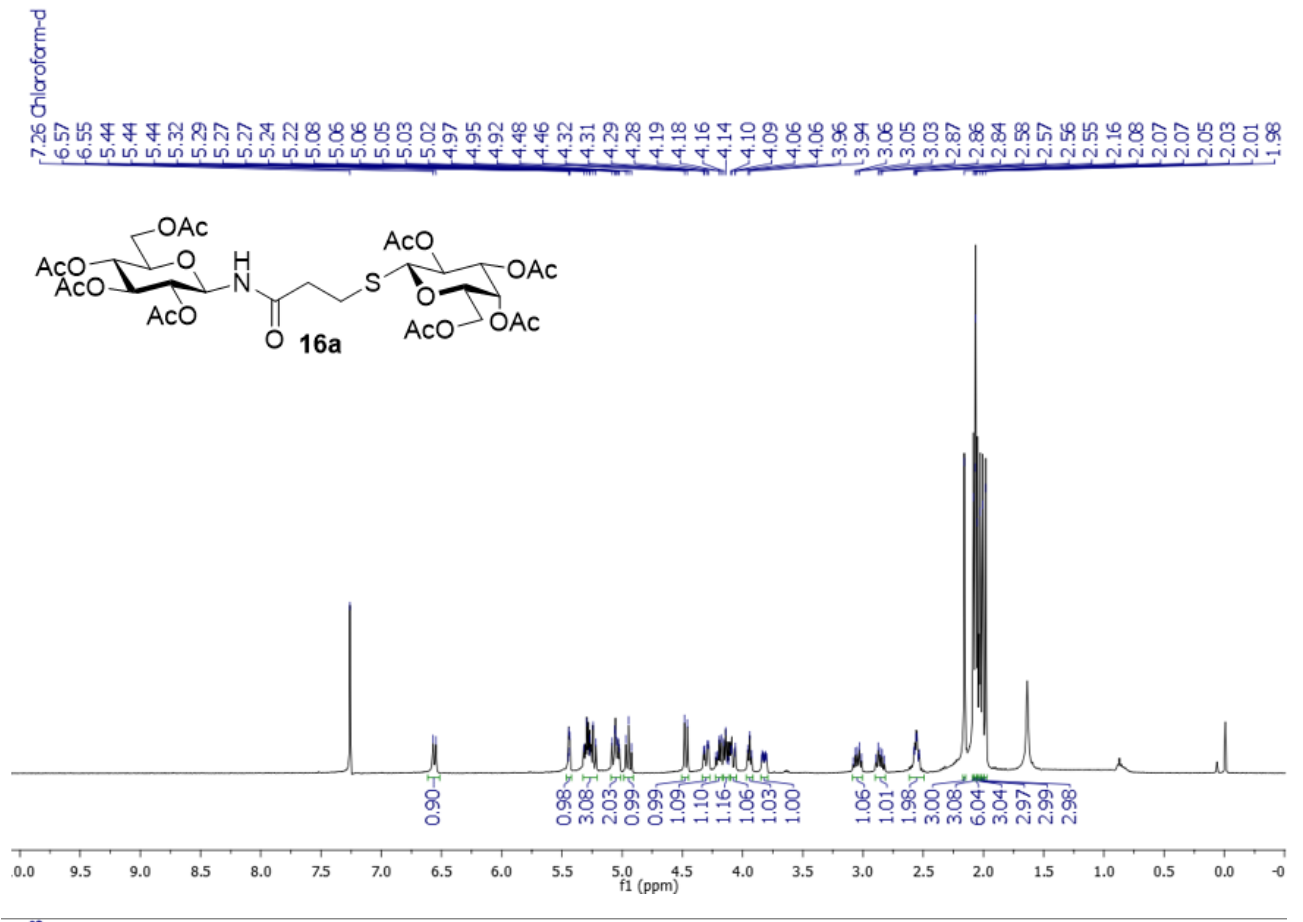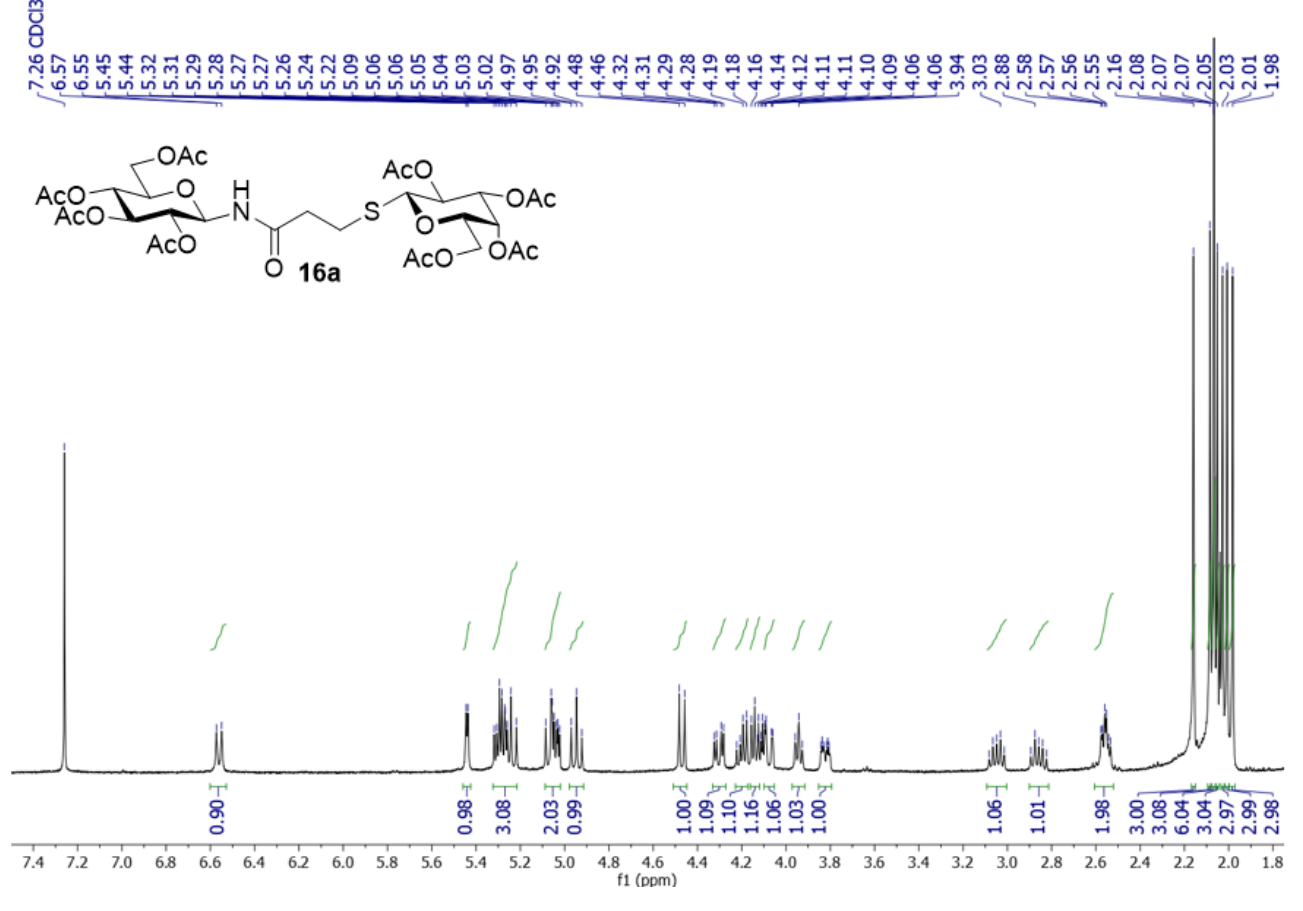

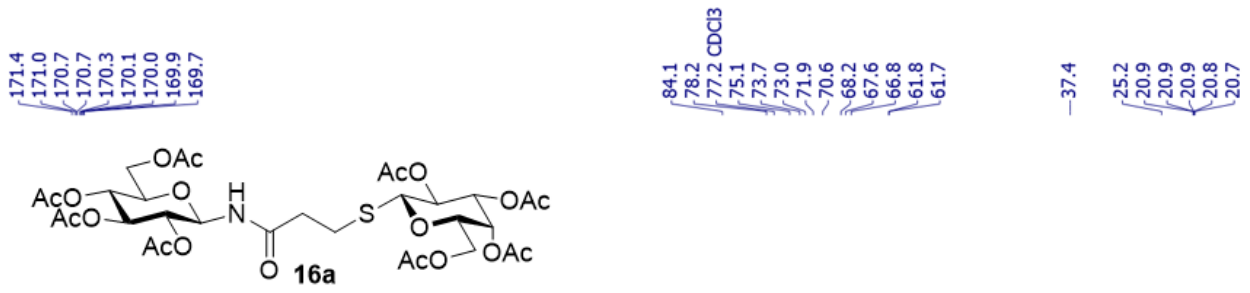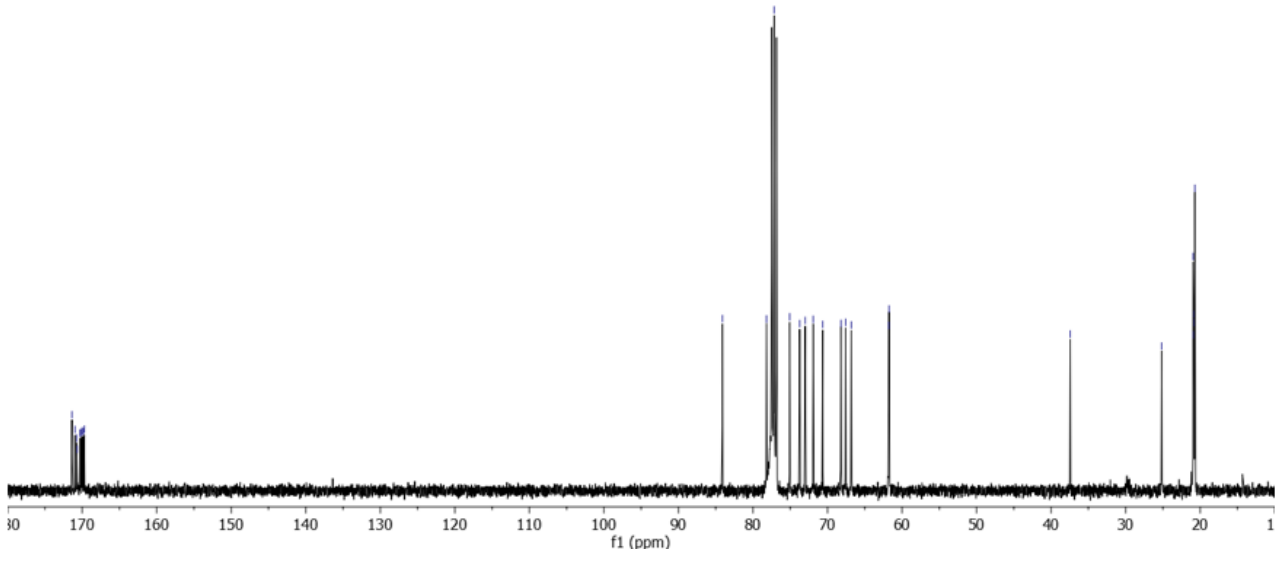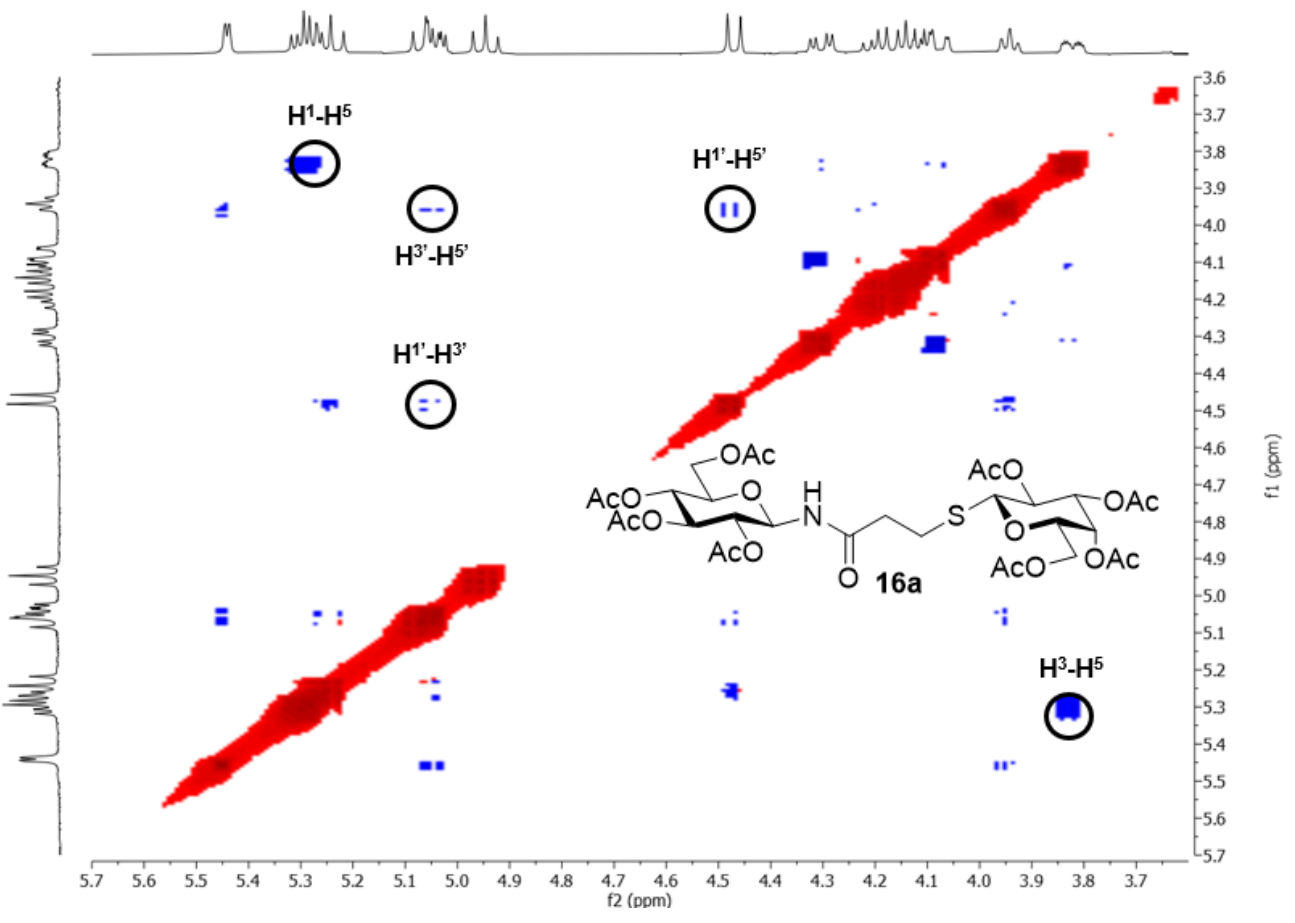

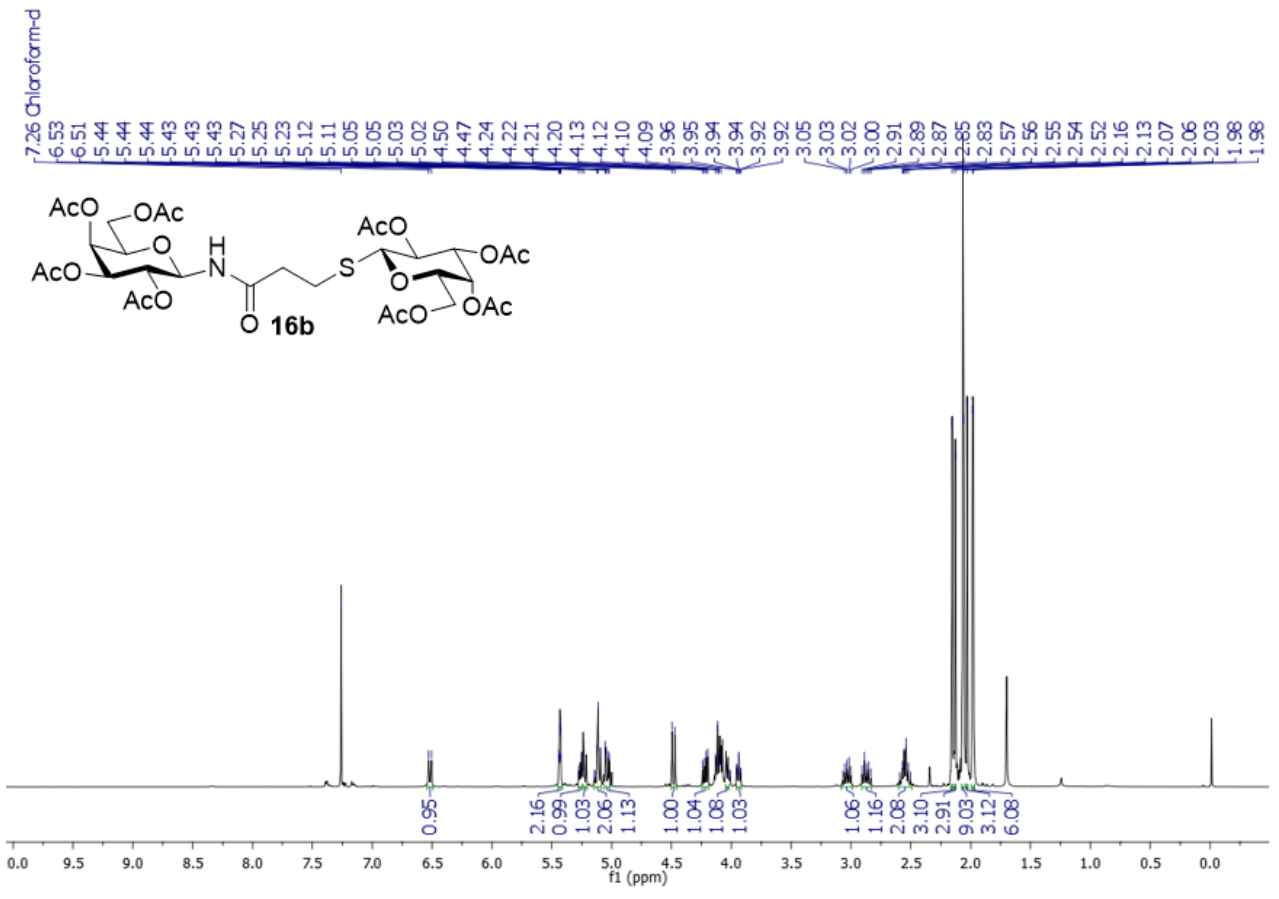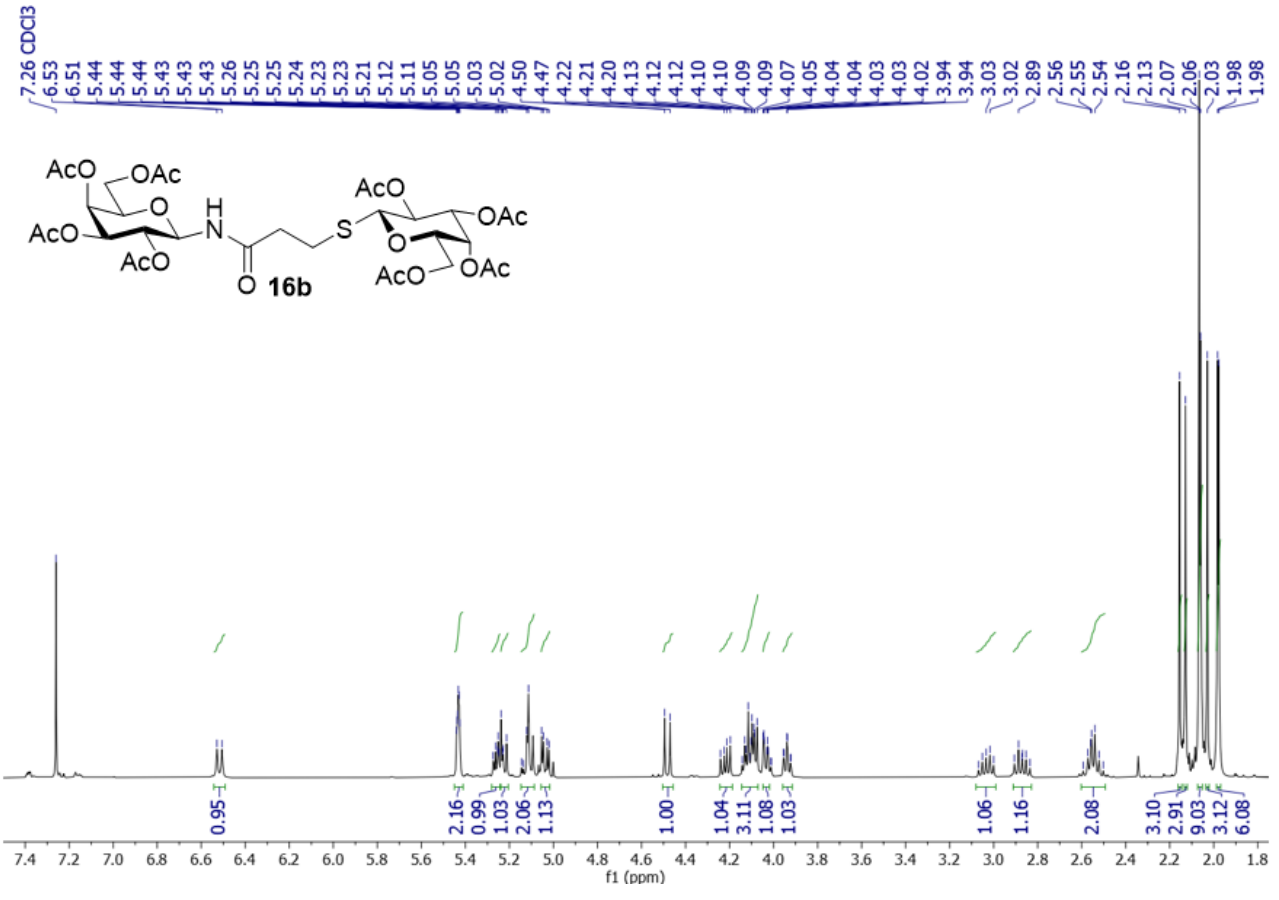



171.3  
171.3  
170.6  
170.5  
170.3  
170.1  
169.9  
169.8

84.2  
78.5  
77.2 CDCl3  
74.9  
72.5  
71.9  
71.0  
68.4  
67.5  
67.3  
66.9  
61.6  
61.2

37.5  
25.2  
21.0  
20.9  
20.8  
20.8  
20.7

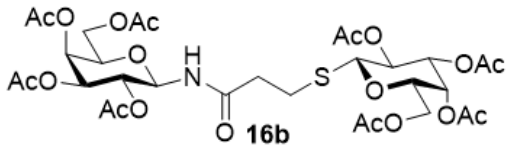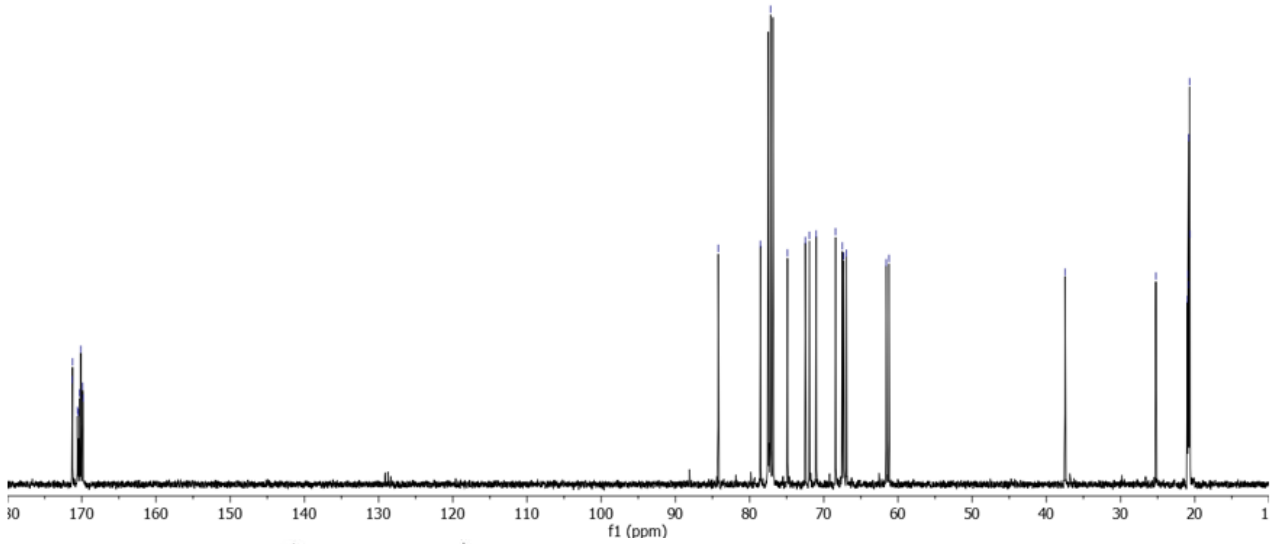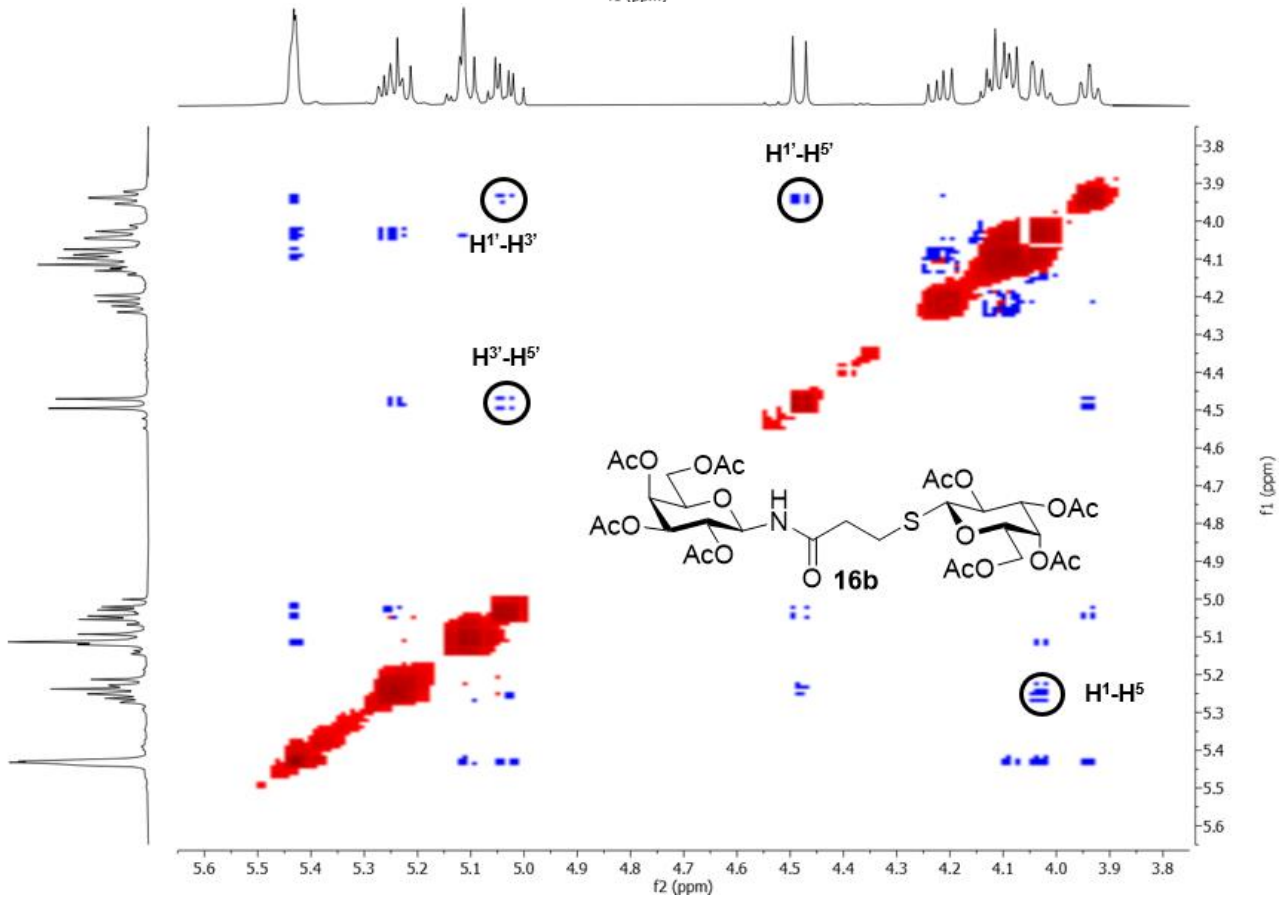

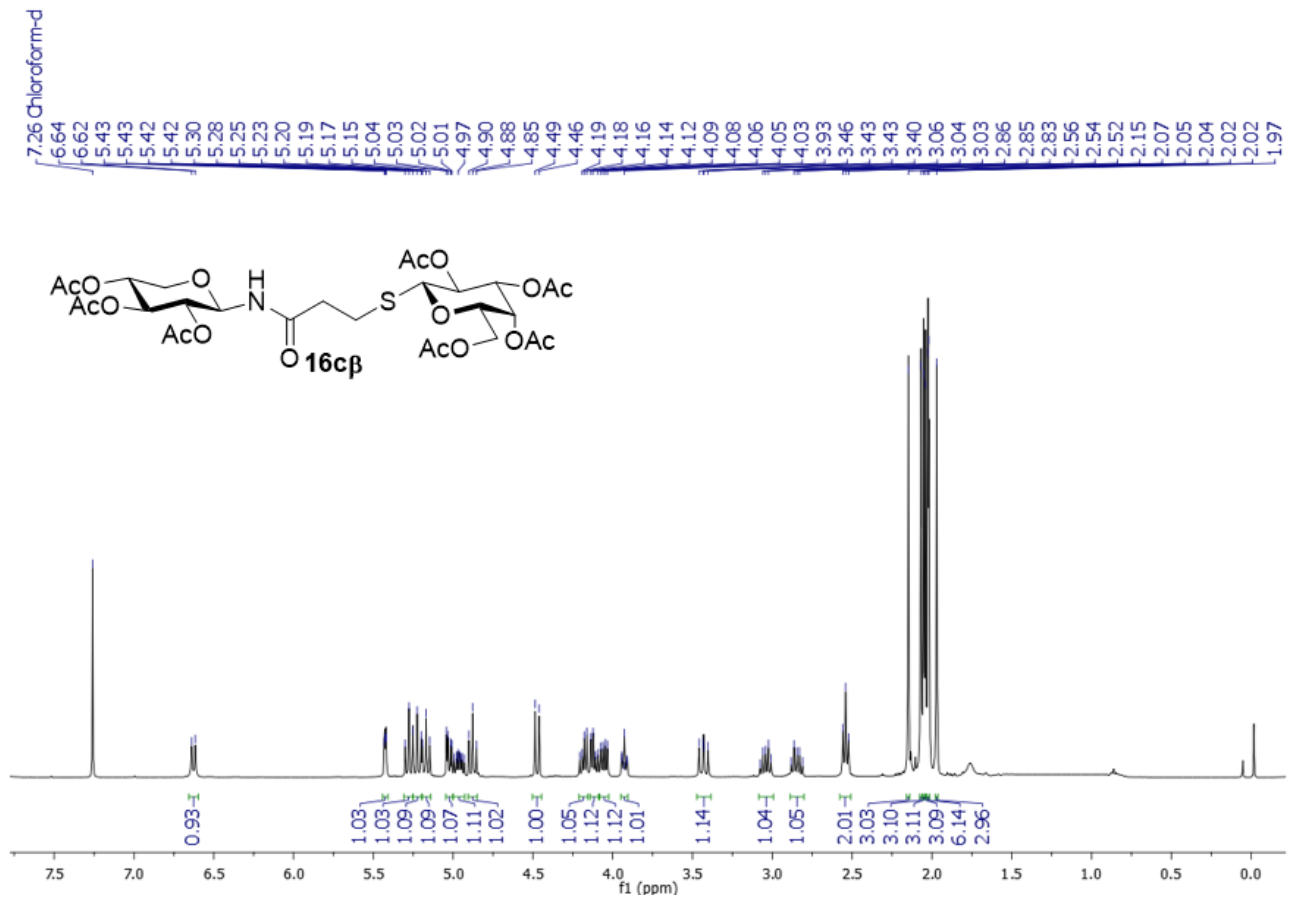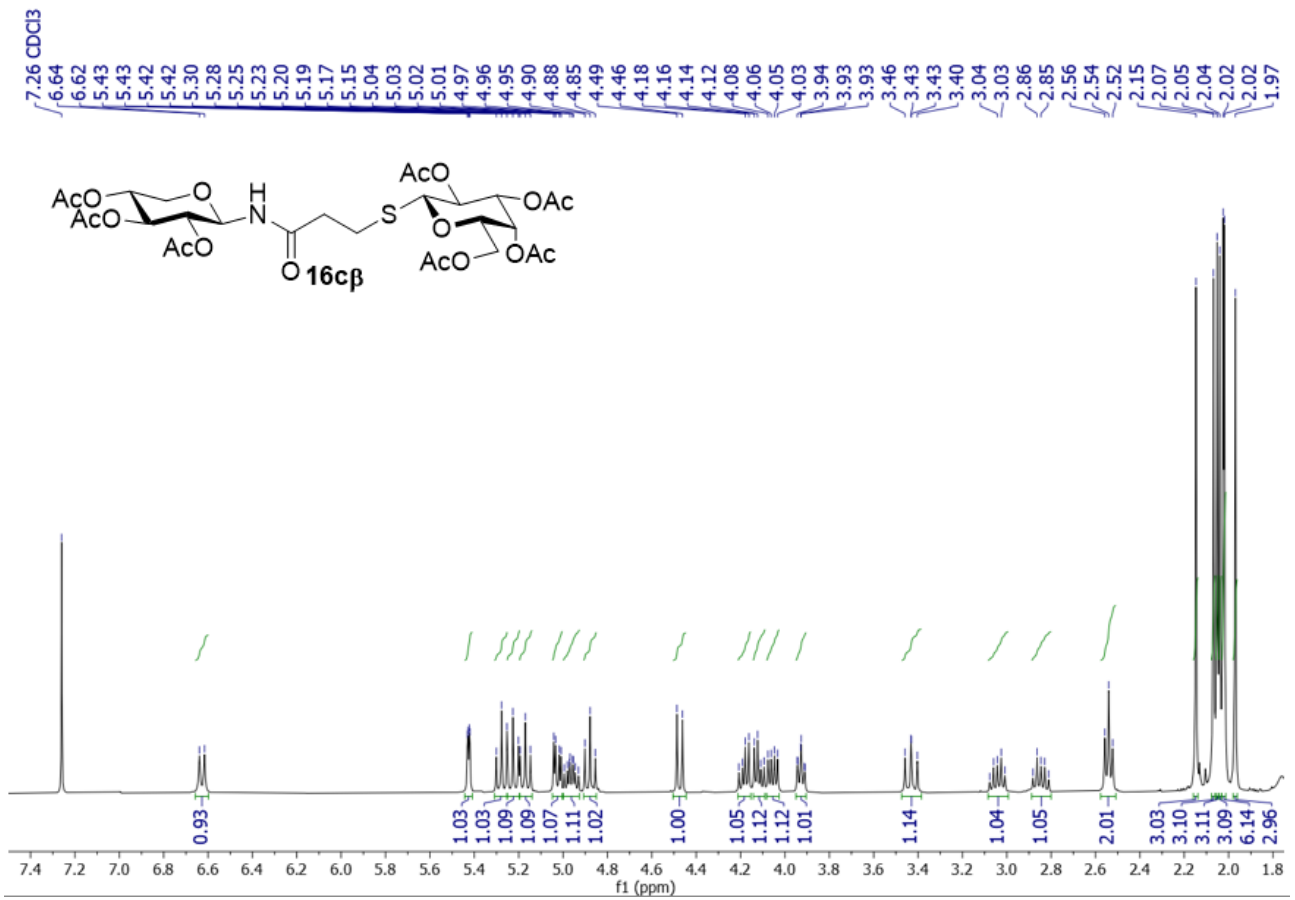

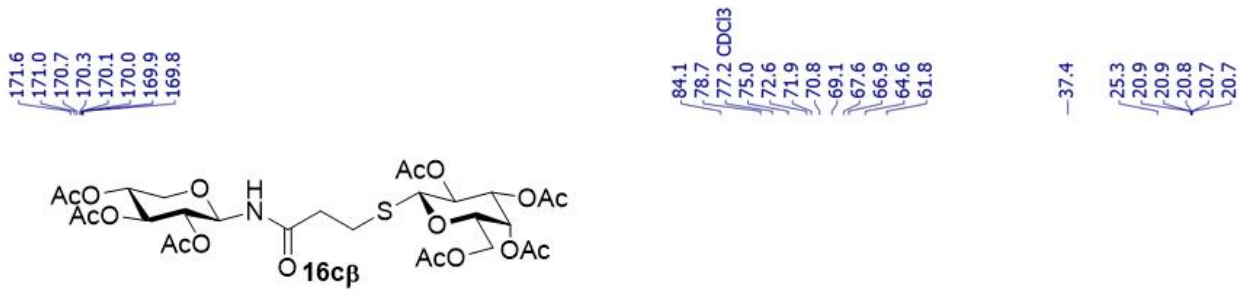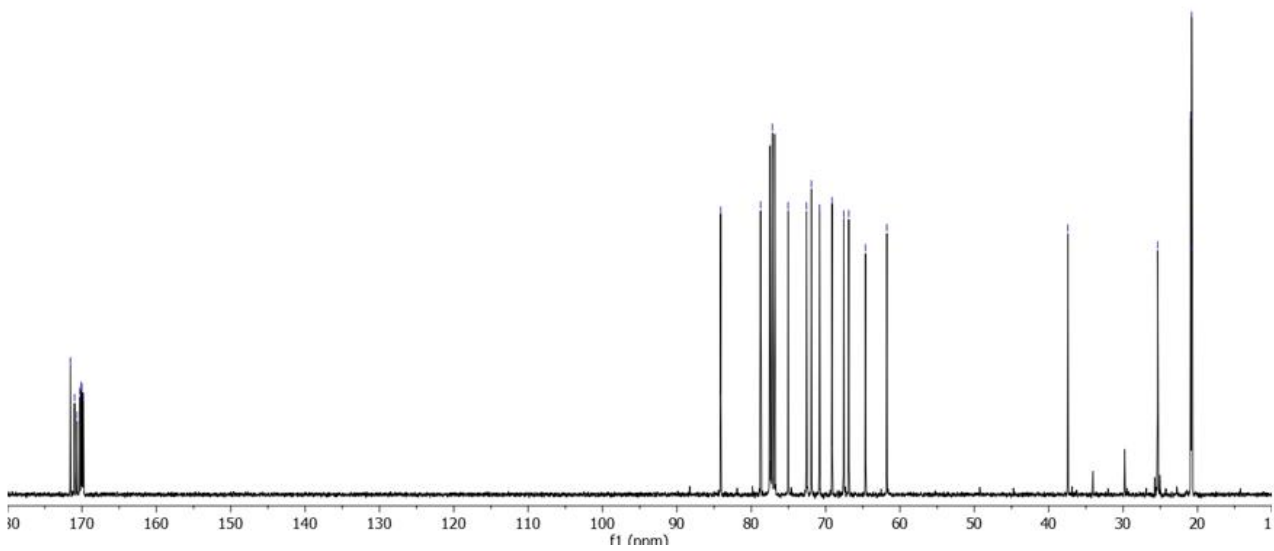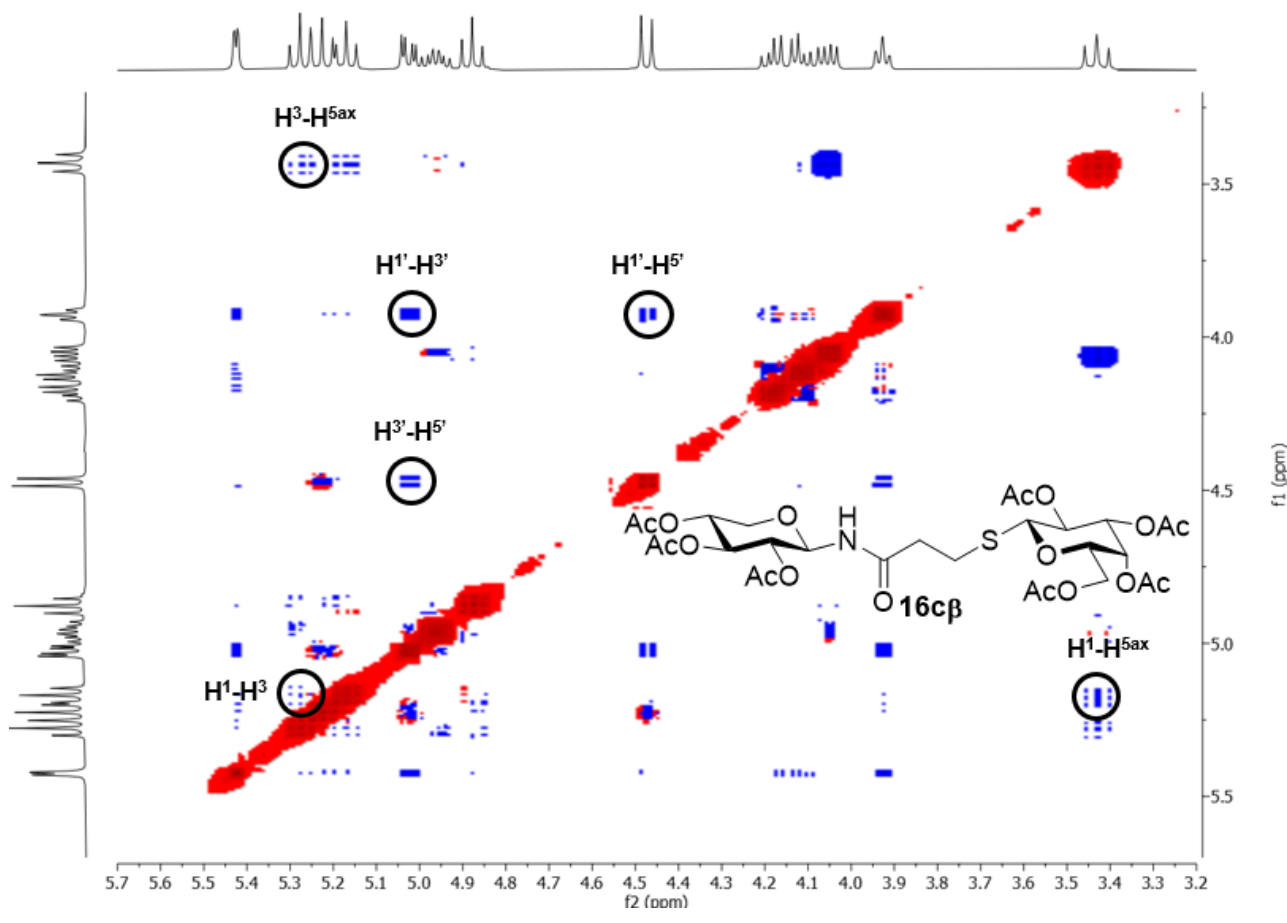

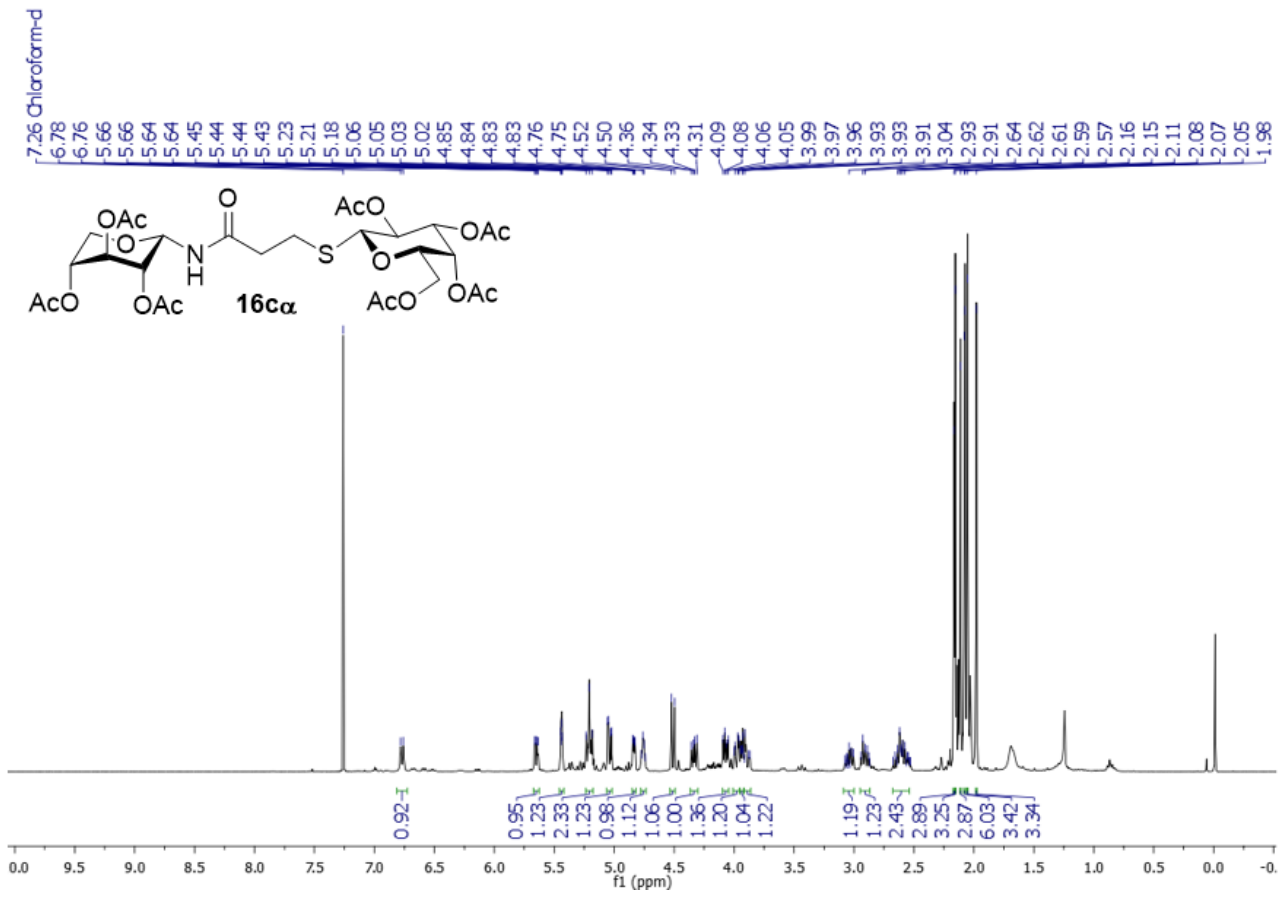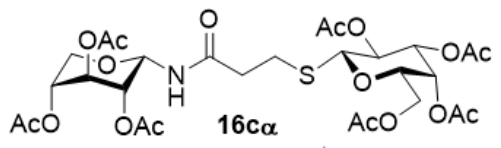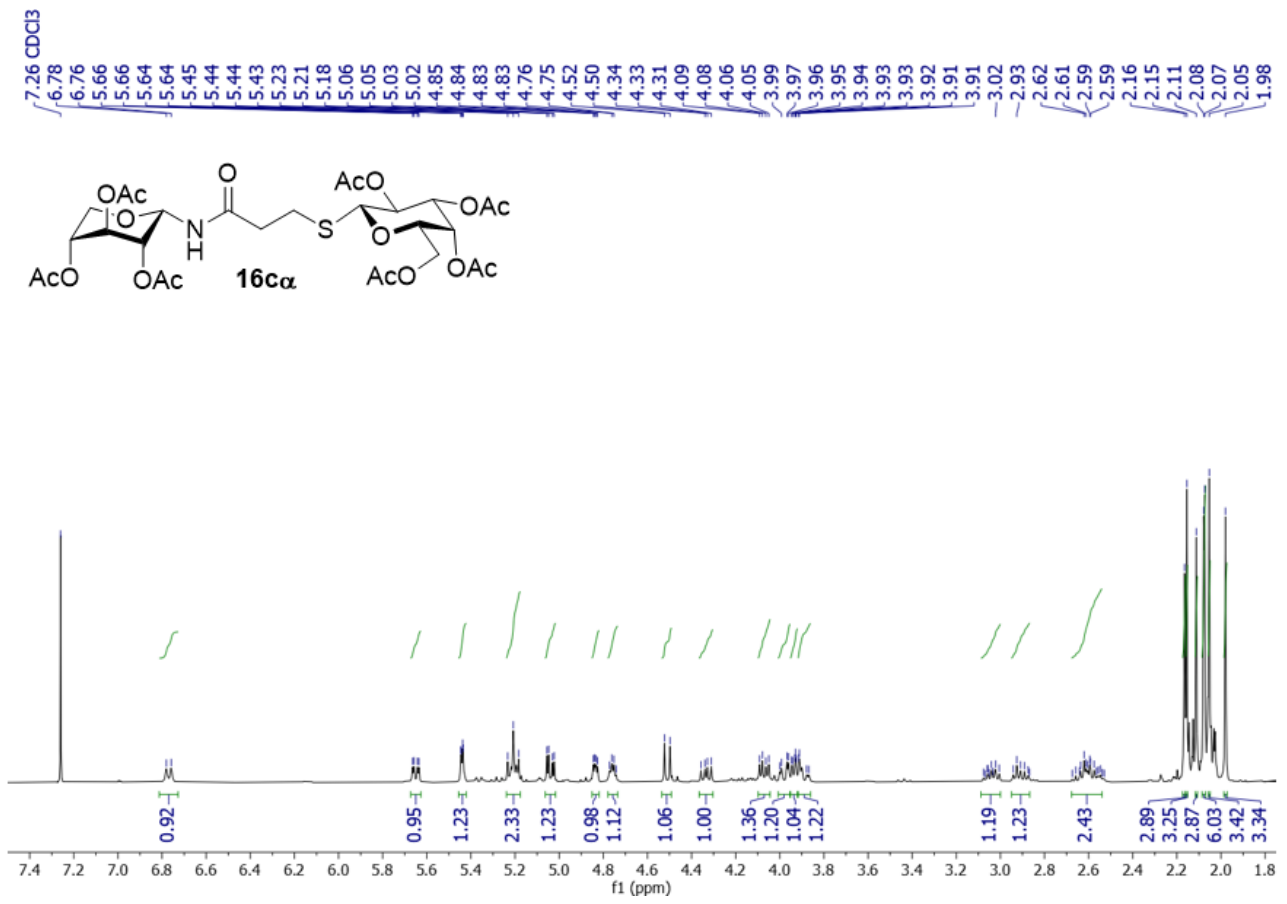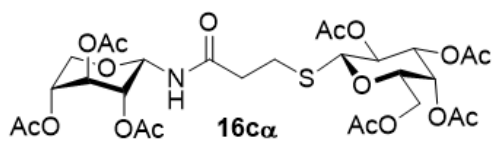

171.4  
170.8  
170.3  
170.1  
169.8  
169.7  
169.1

85.0  
77.2 CDCl<sub>3</sub>  
75.2  
74.4  
71.8  
68.4  
67.6  
67.0  
66.9  
63.9  
62.0

37.4  
26.4  
21.0  
20.9  
20.9  
20.8  
20.7

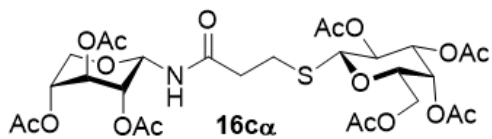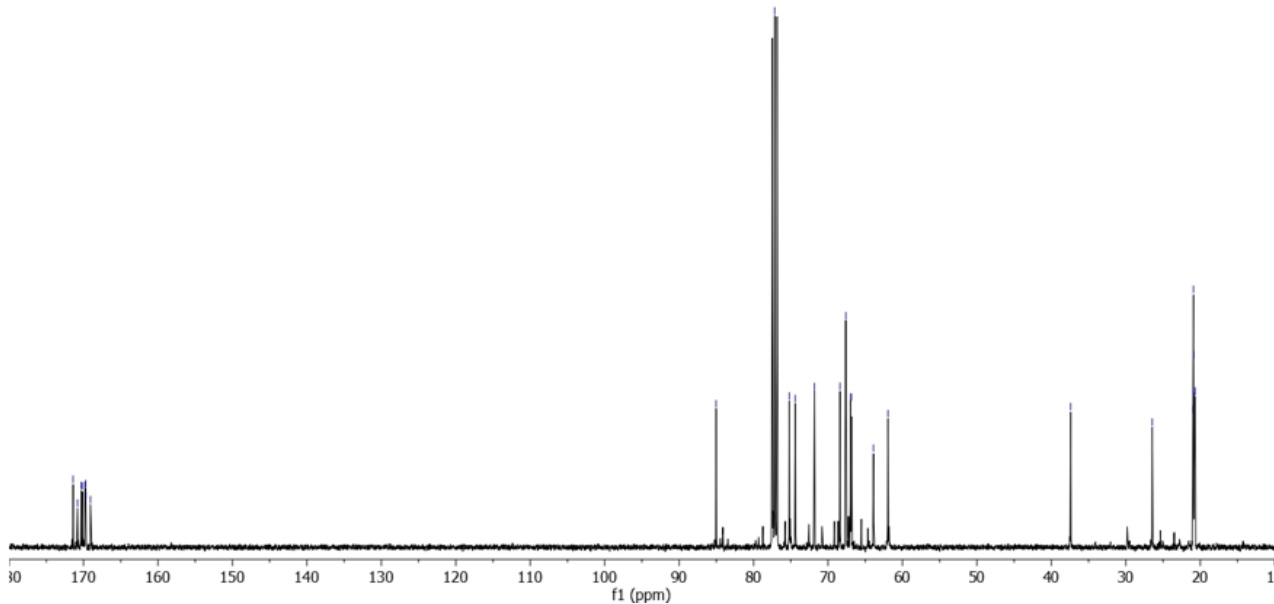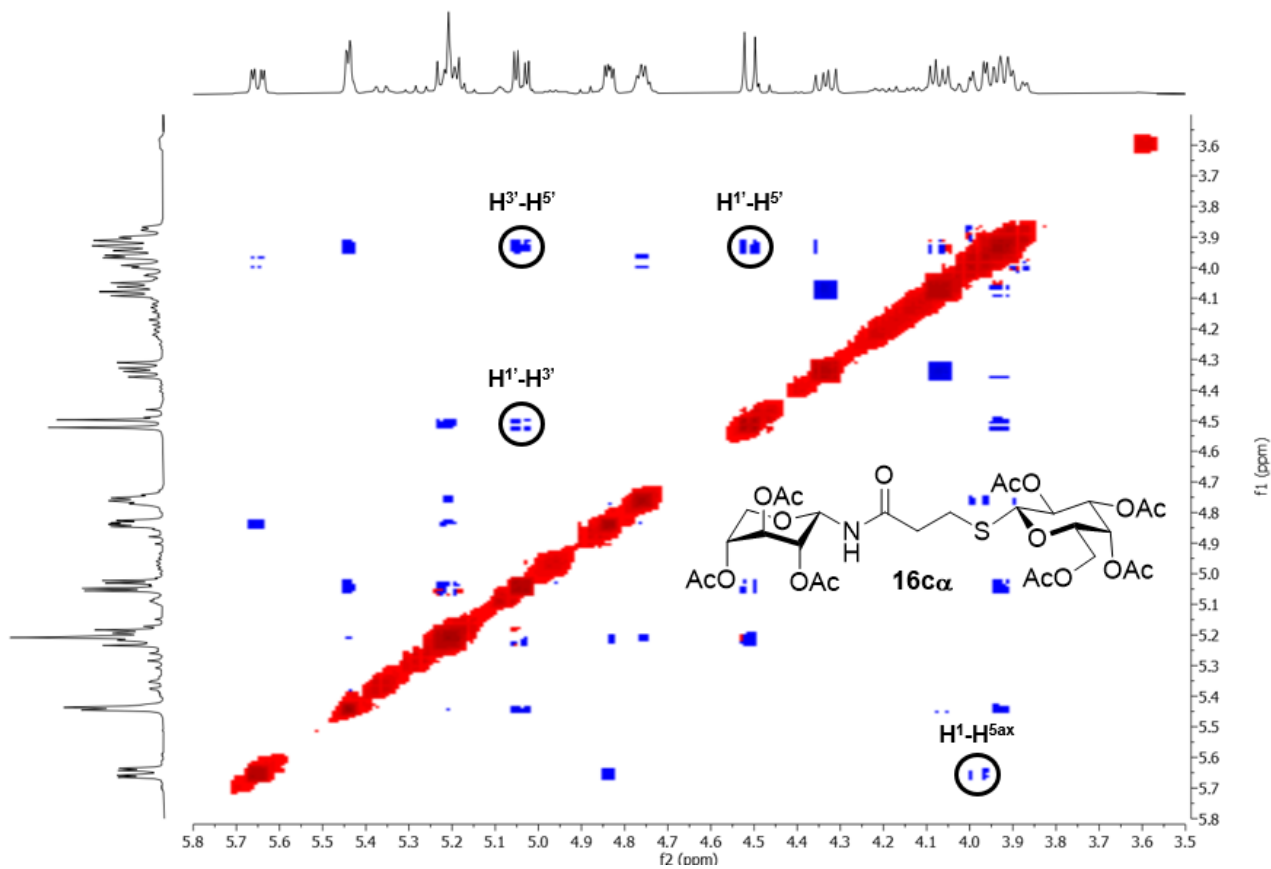

$^1\text{H}$ ,  $^{13}\text{C}$ , and NOESY NMR spectra of free *N*-glycosyl amides **17a-c $\beta$** , **18a-c $\beta$** , and **19a-c $\beta$** .

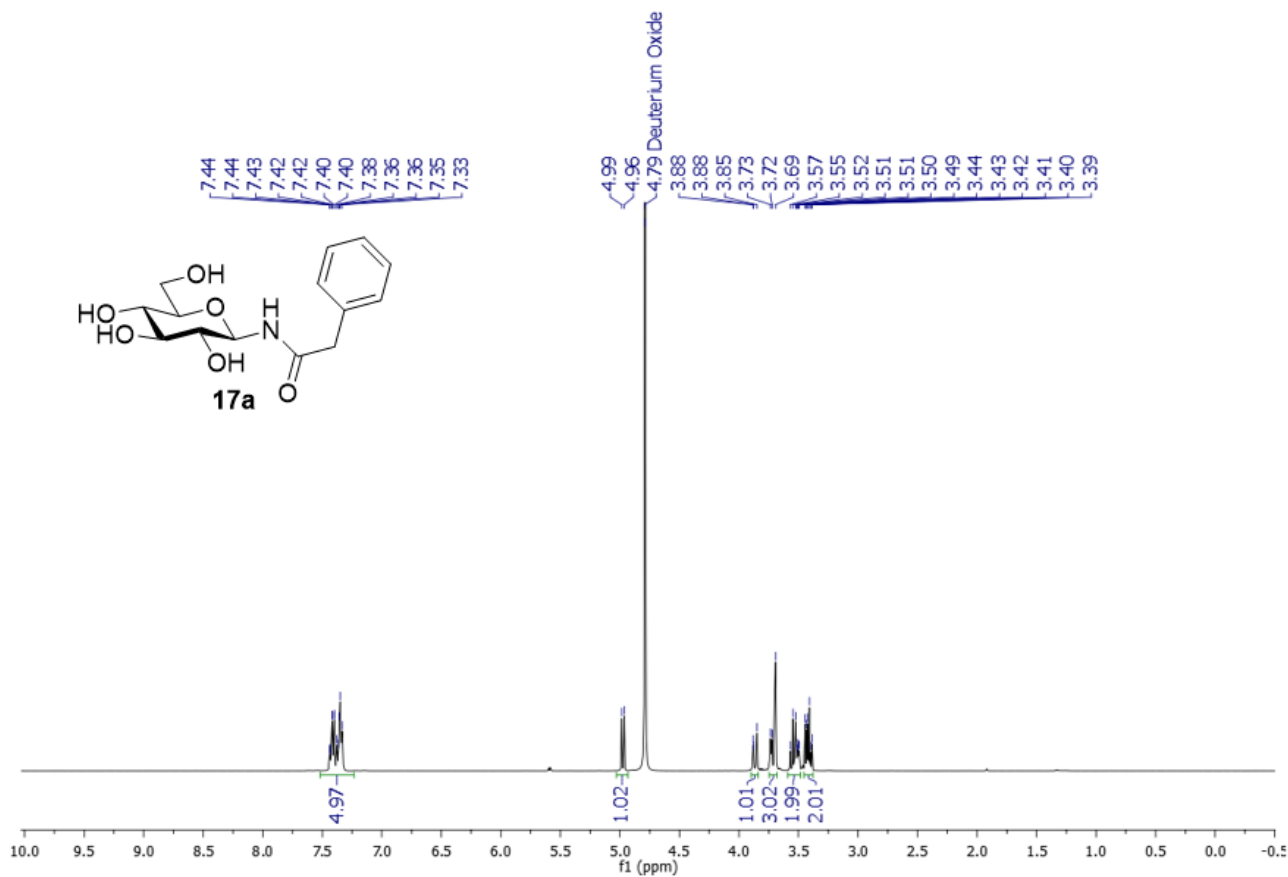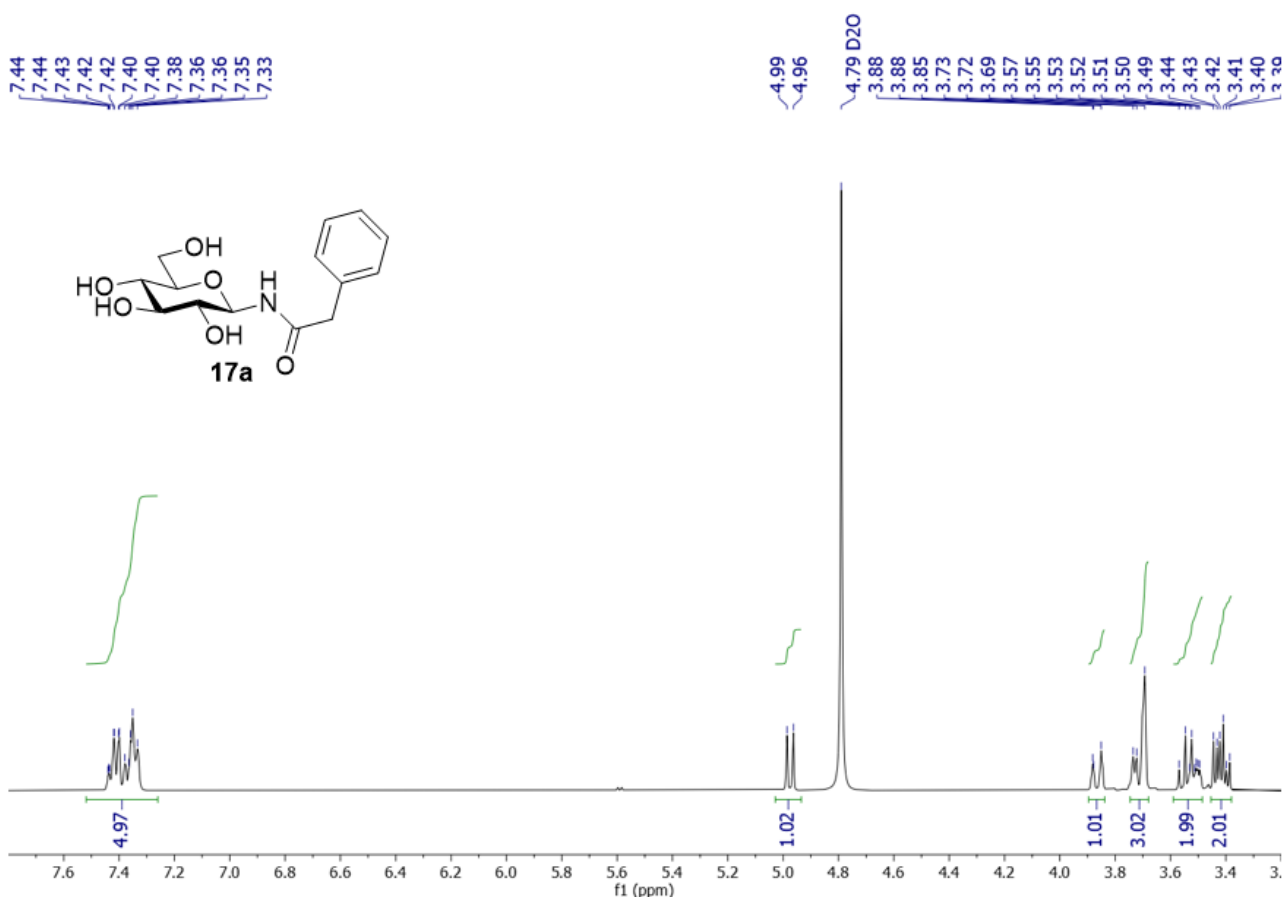

-175.9

-134.5  
-129.3  
-128.9  
-127.4

-79.4  
-77.6  
-76.5  
-71.8  
-69.3

-60.6

-42.2

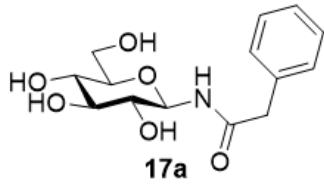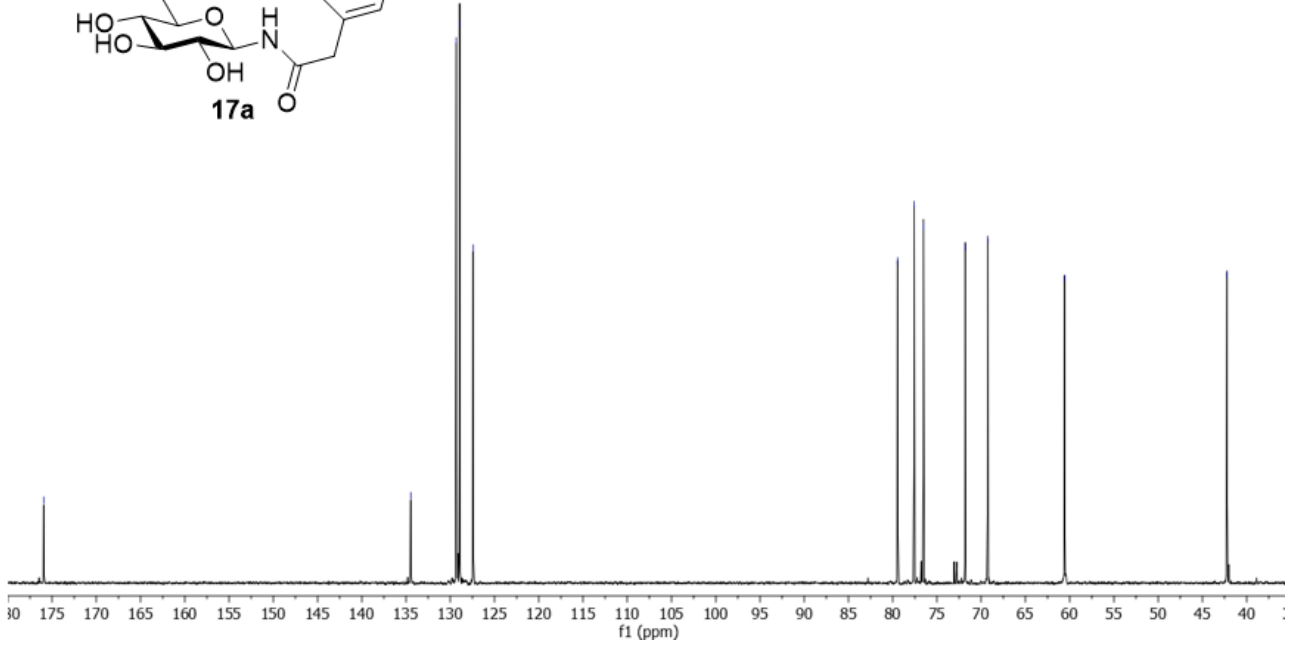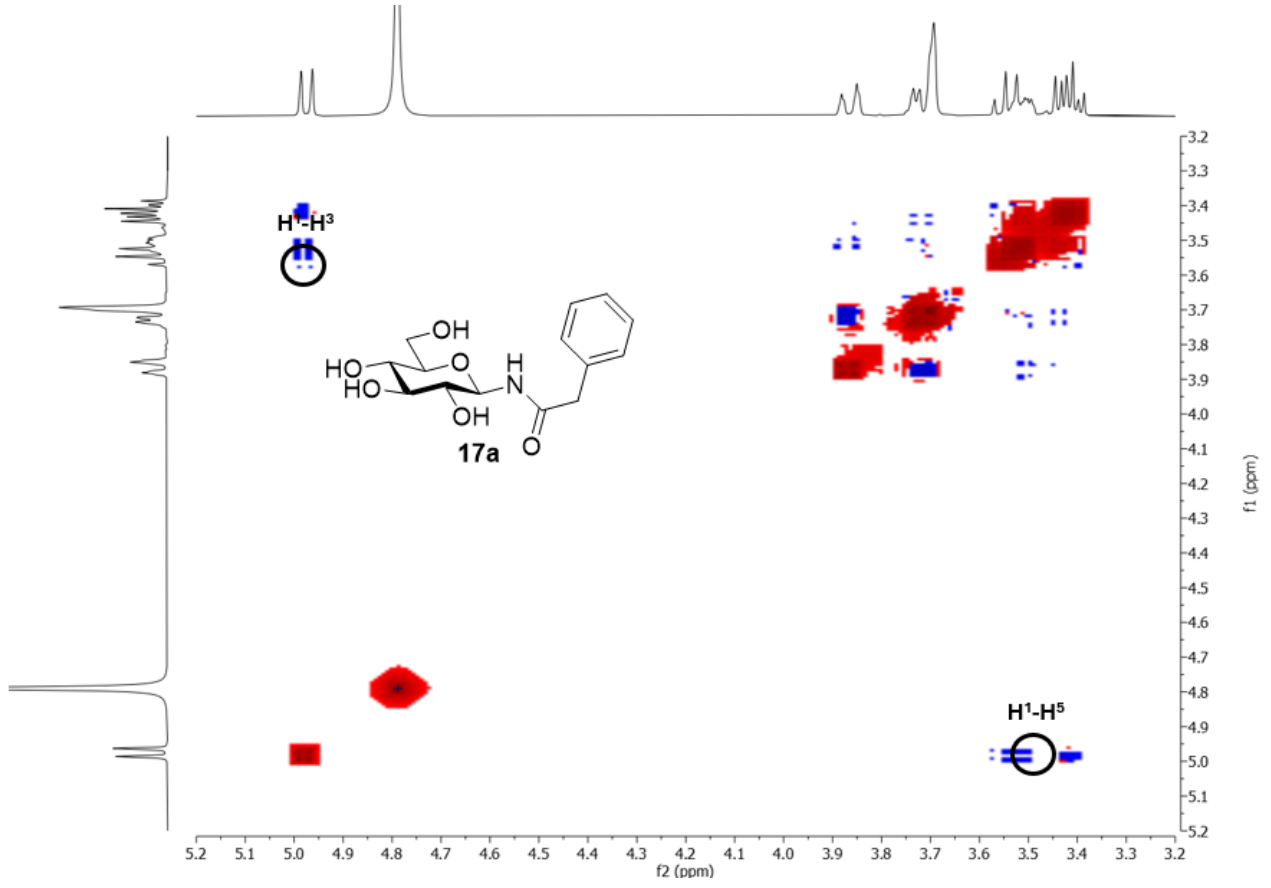

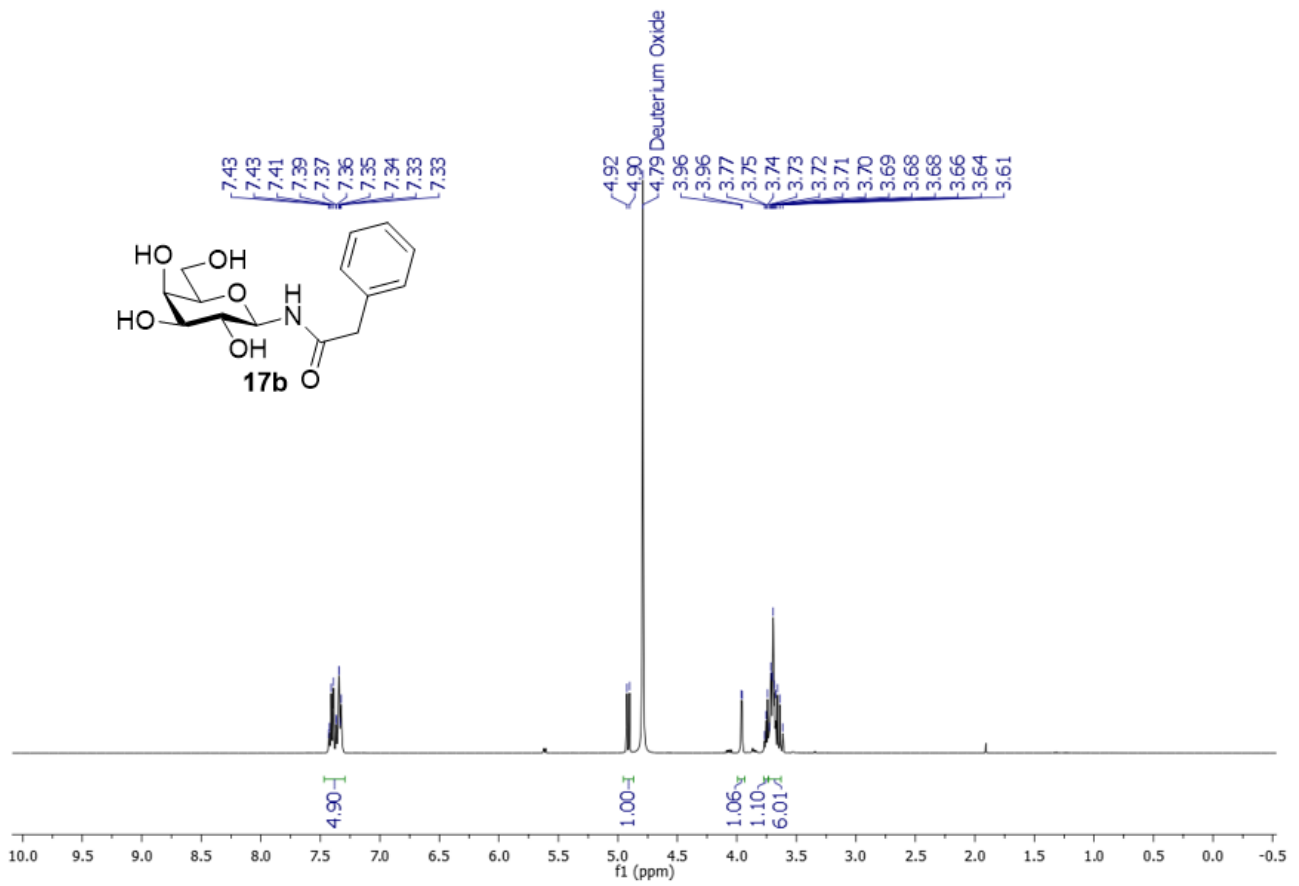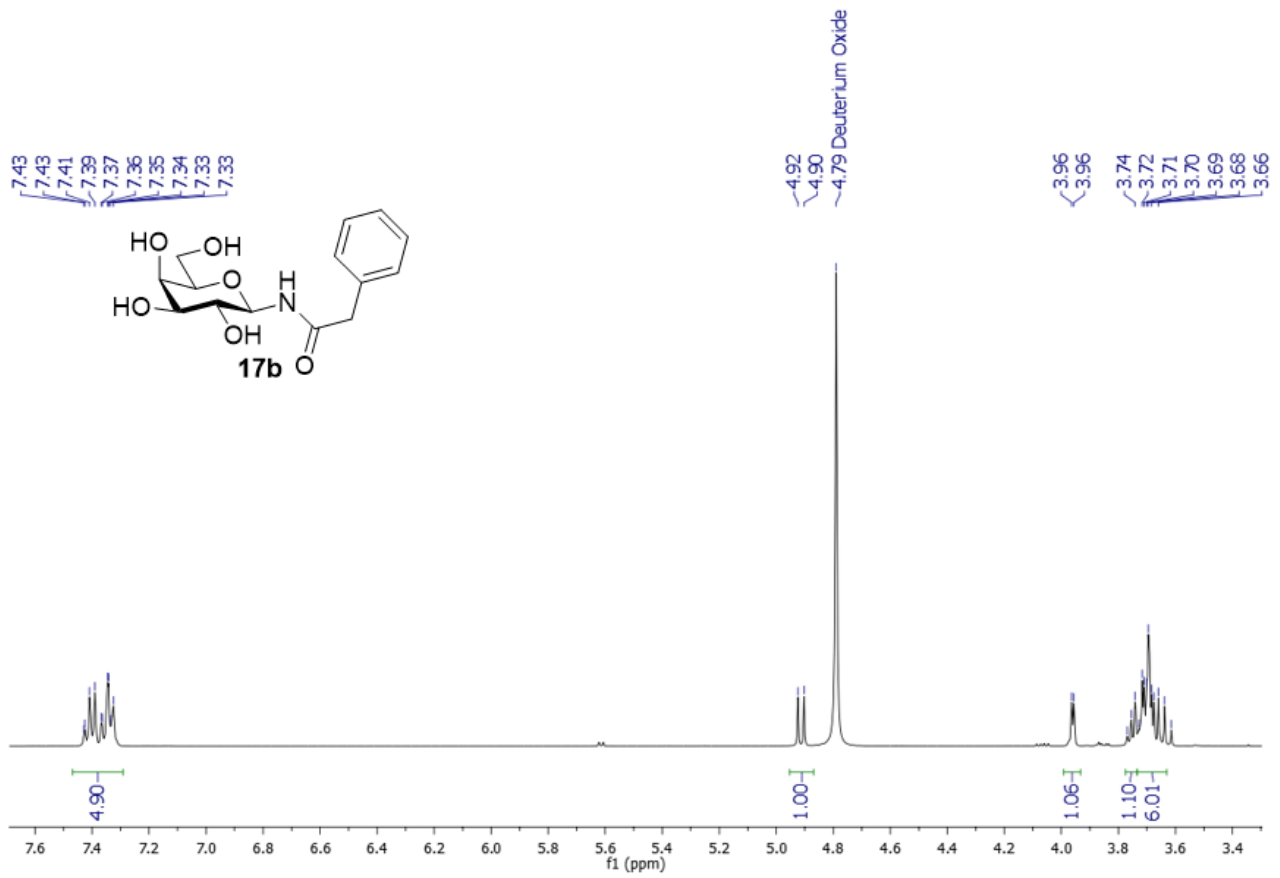



-176.0

-134.5  
-129.3  
-128.9  
-127.4

-79.9  
-76.7  
-73.4  
-69.3  
-68.7

-60.9

-42.2

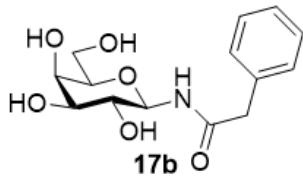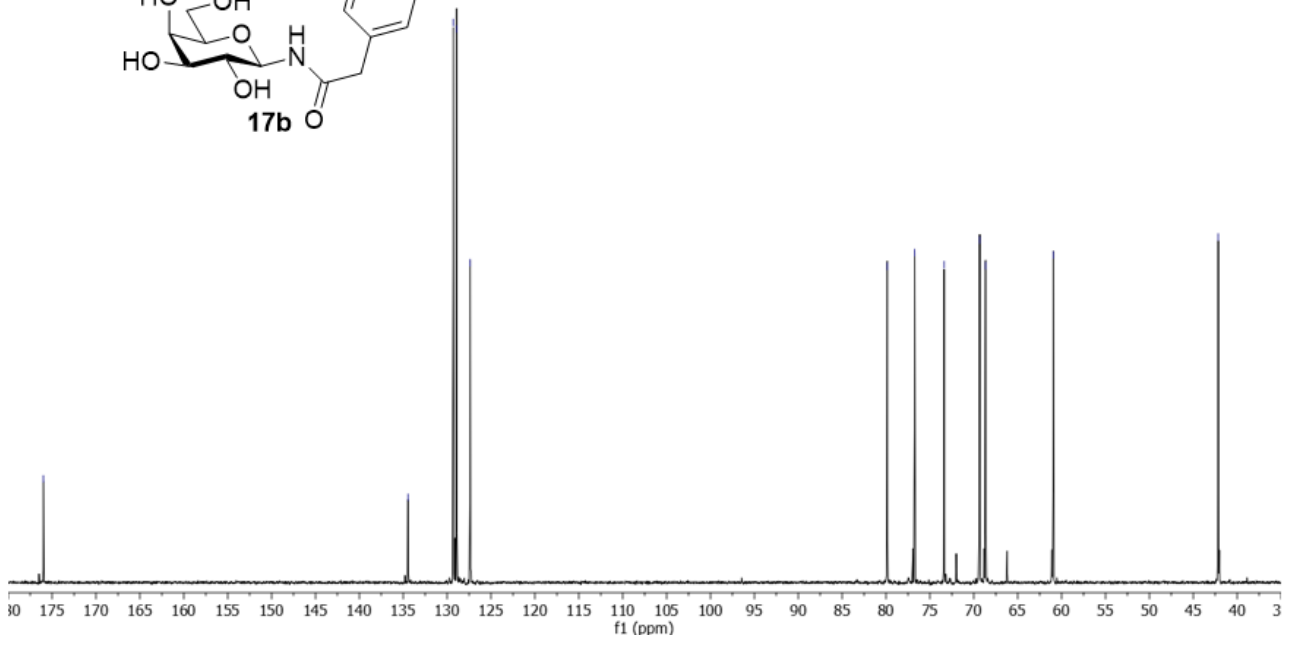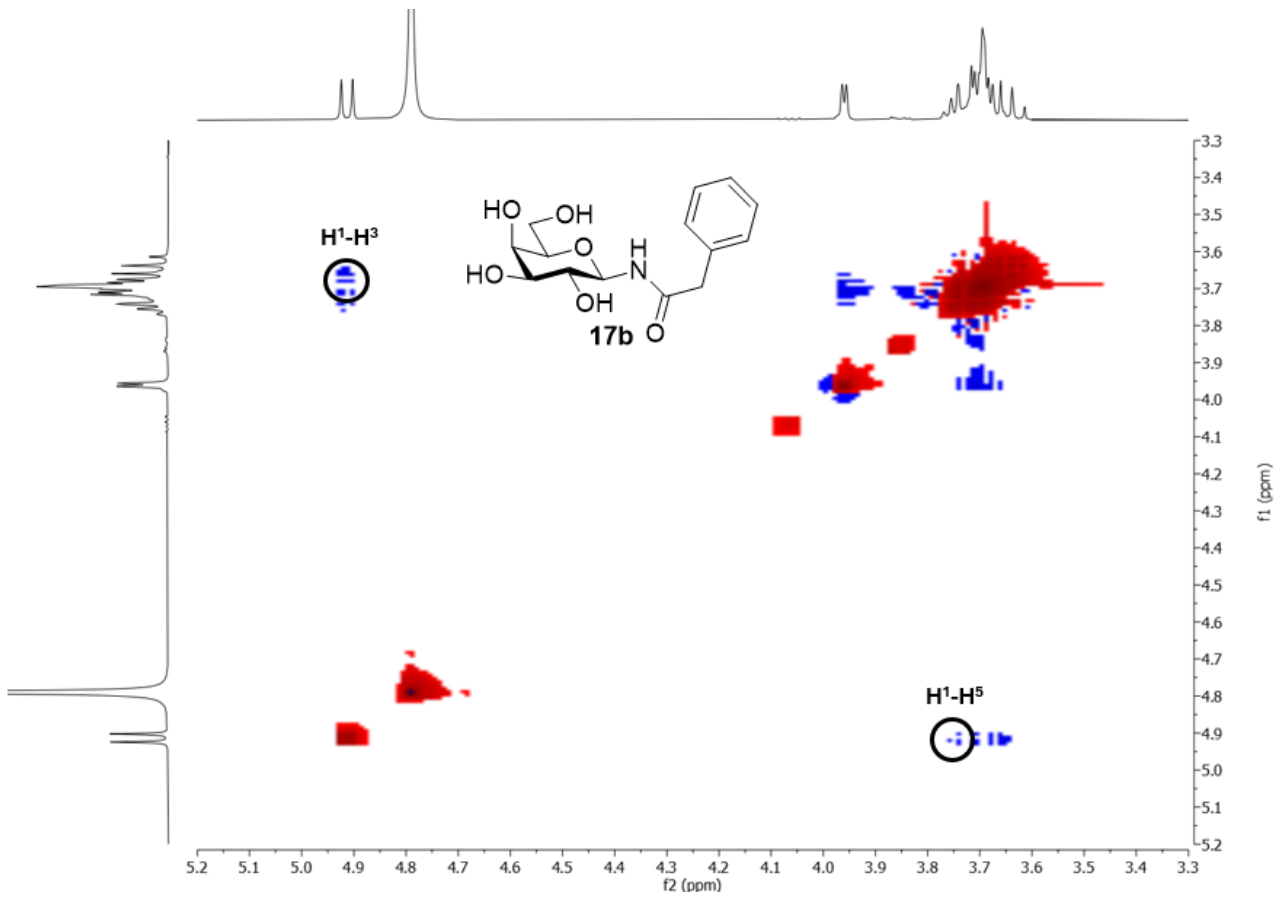

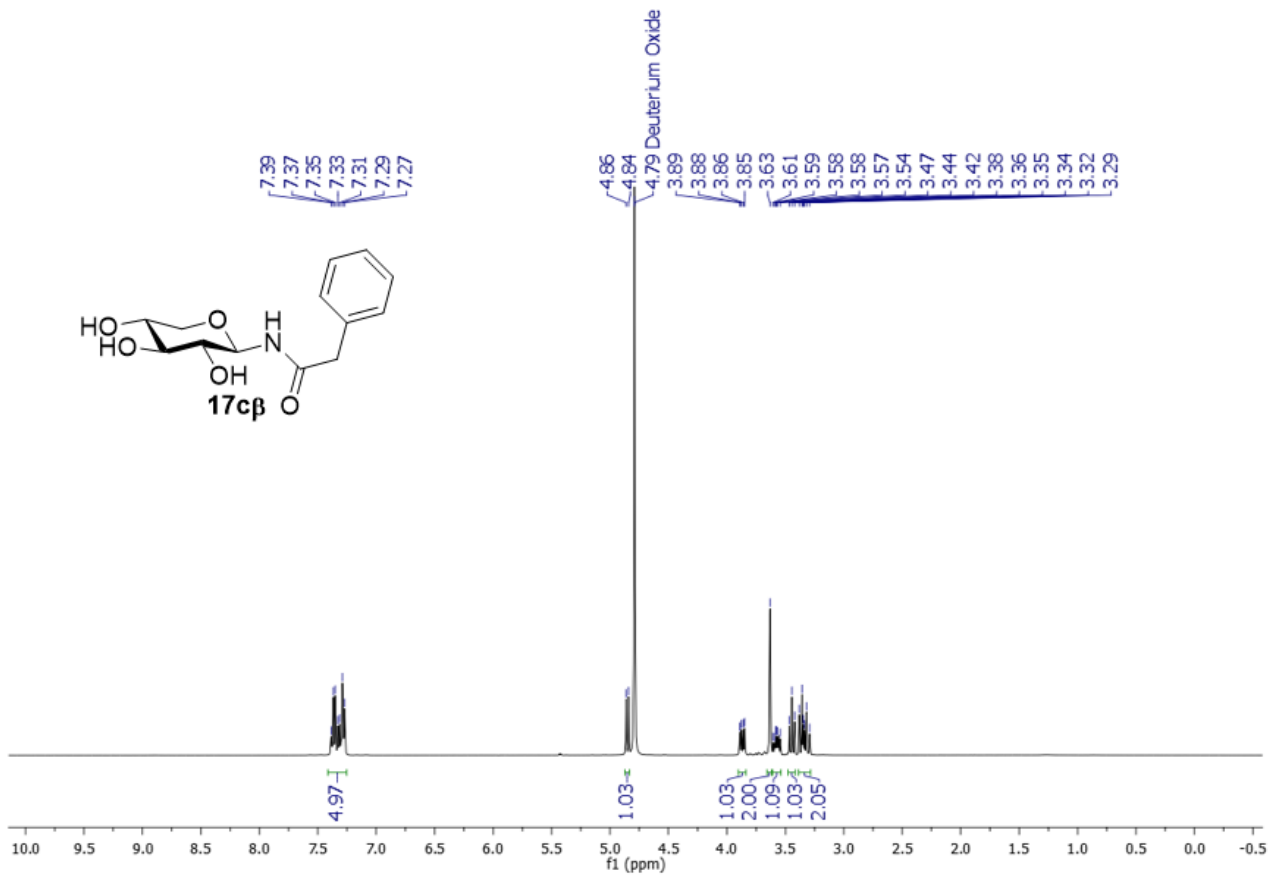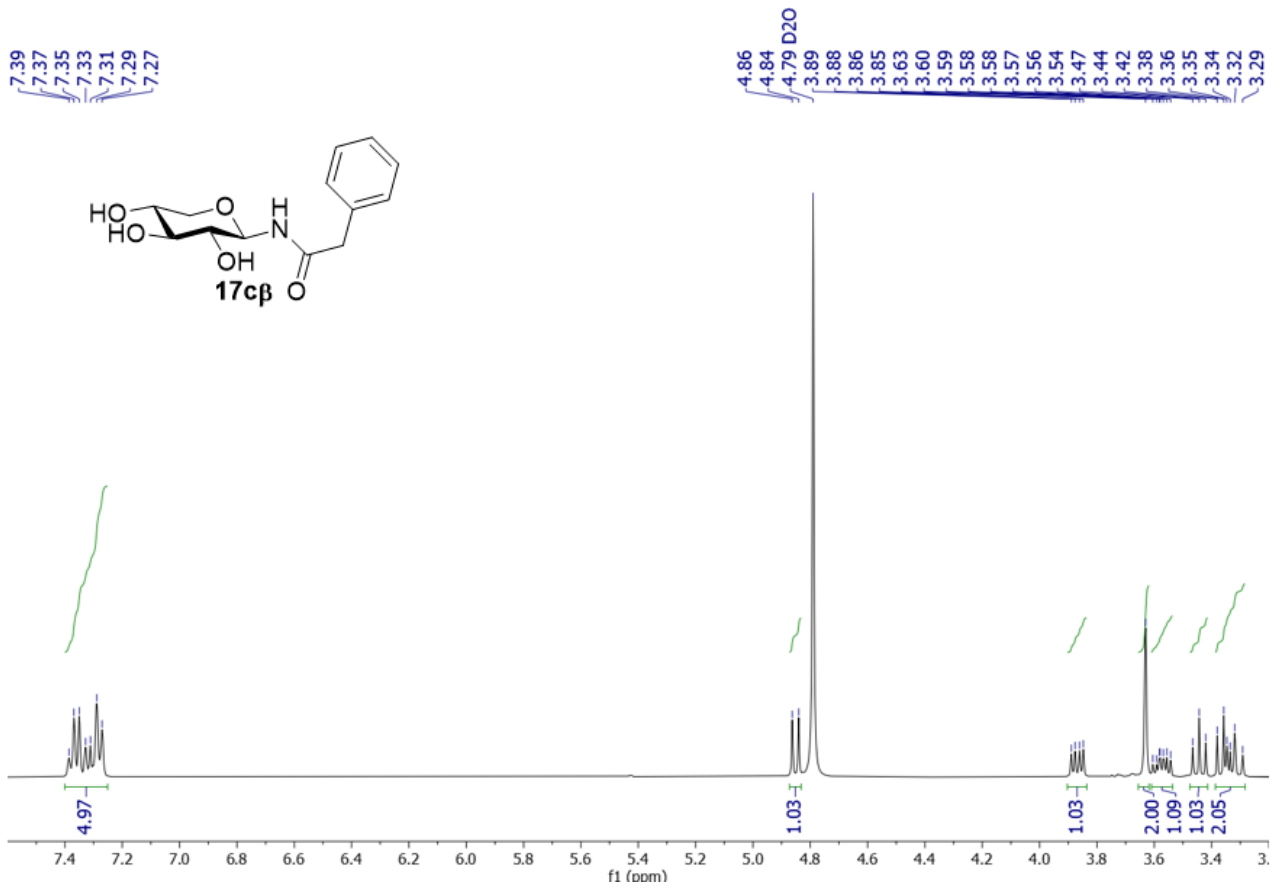

-175.9

-134.3  
-129.2  
-128.9  
-127.3

-80.0  
-76.5  
-71.6  
-68.9  
-66.7

-42.1

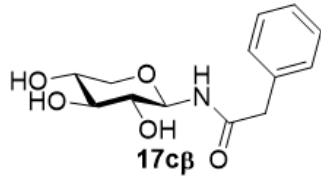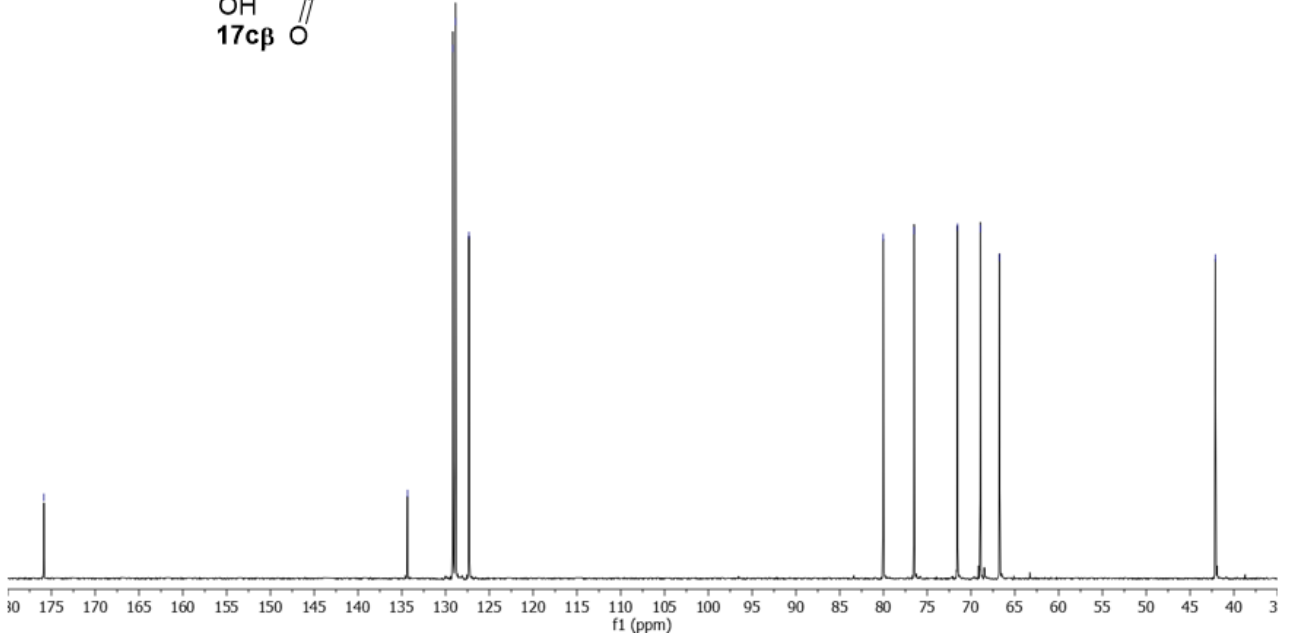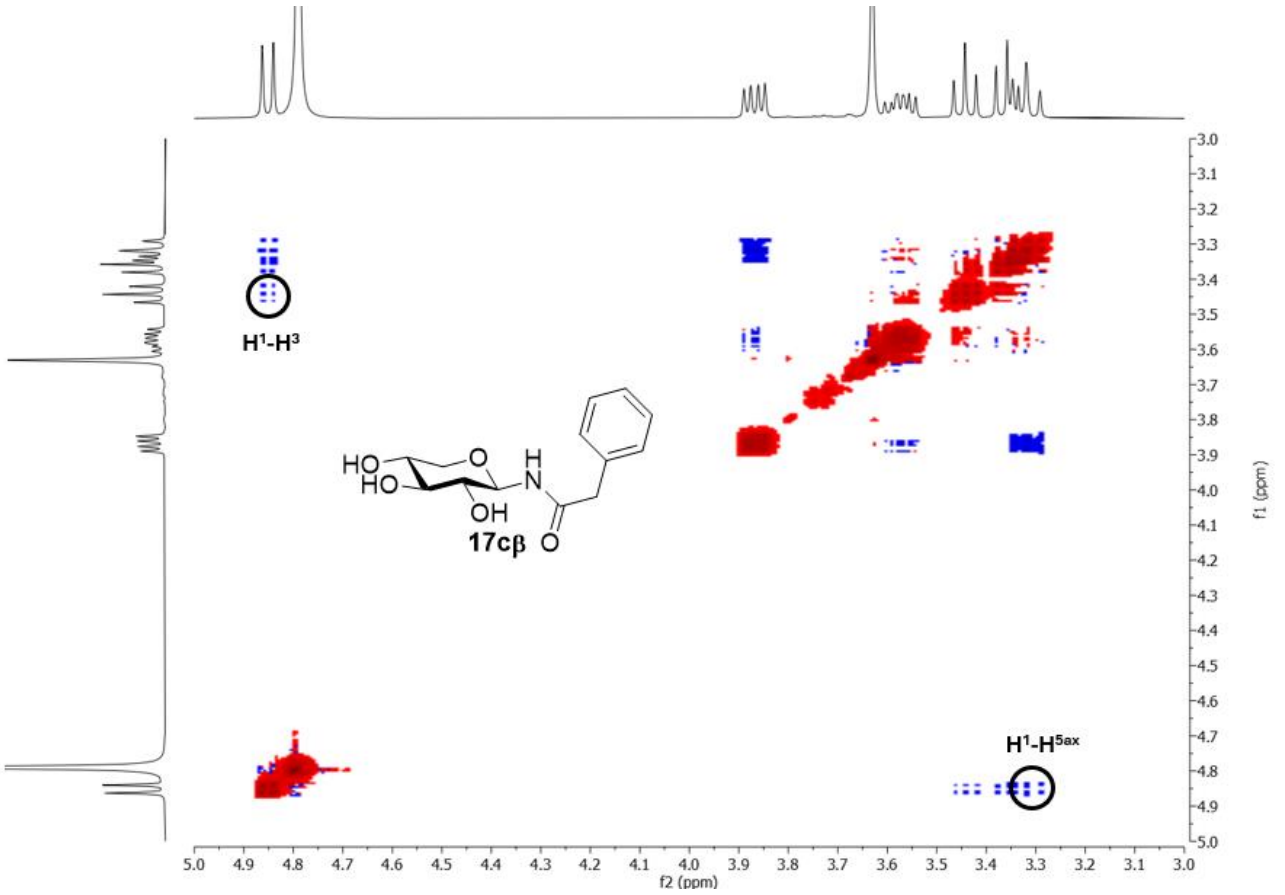

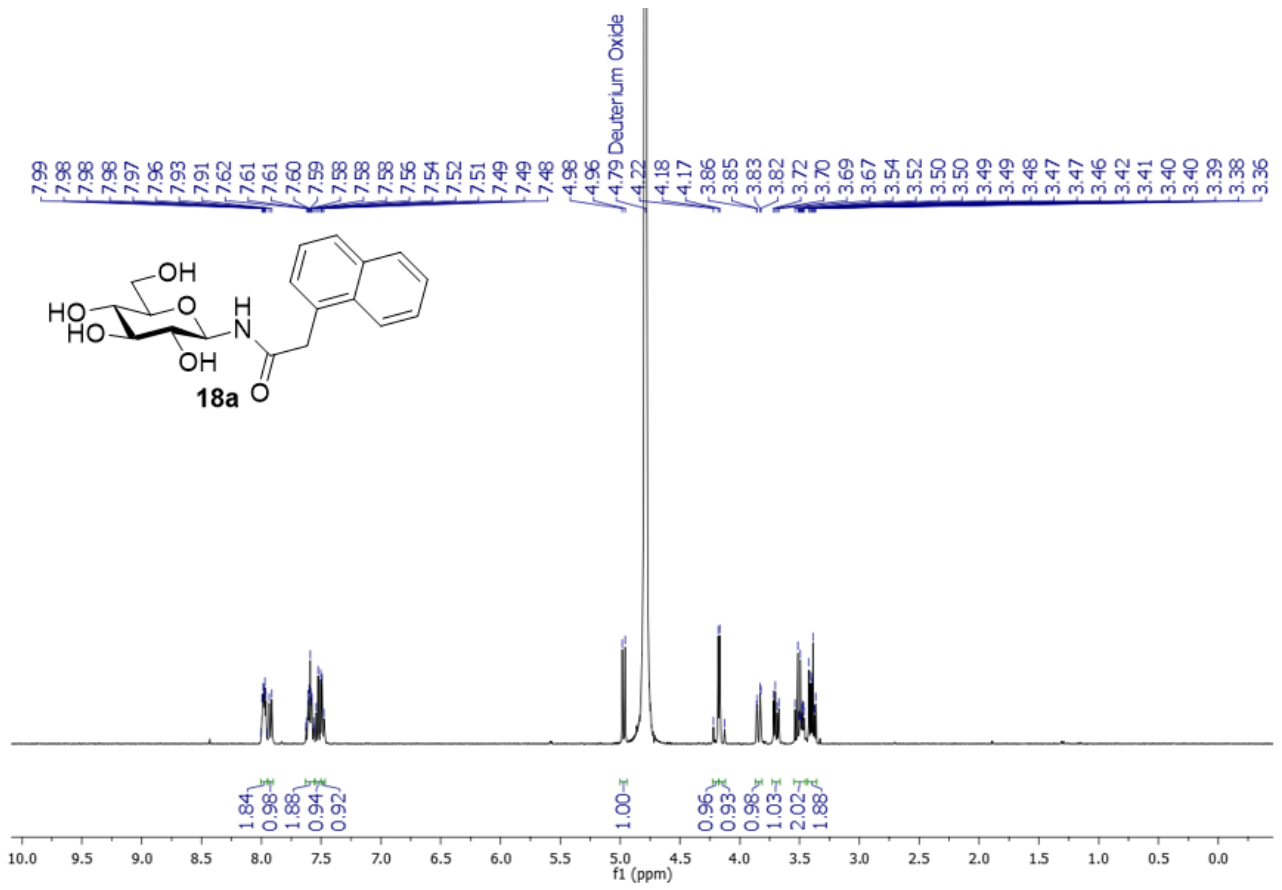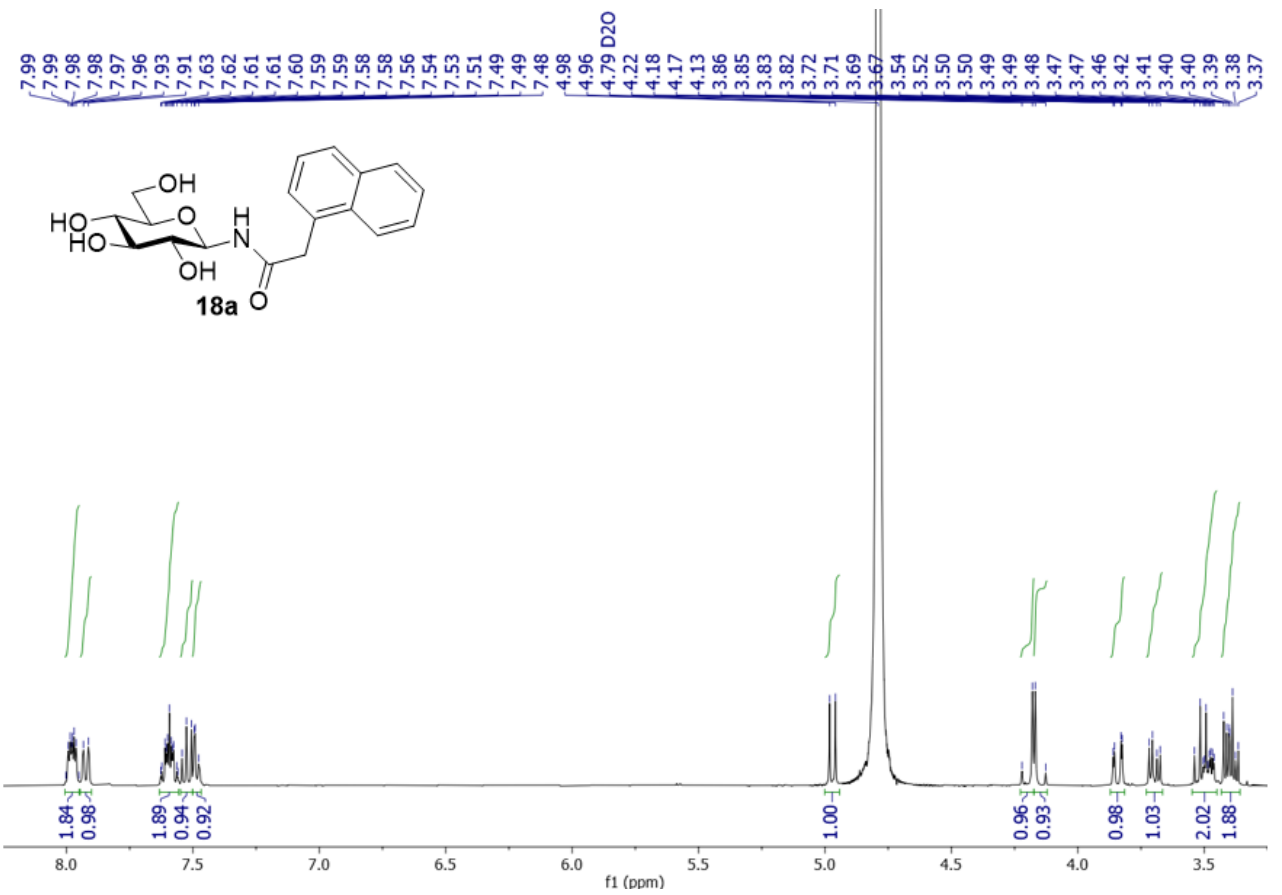

-175.8

133.5  
131.7  
130.5  
128.7  
128.6  
128.2  
126.7  
126.2  
125.8  
123.6

-79.4  
-77.5  
-76.5  
-71.8  
-69.2

-60.5

-39.8

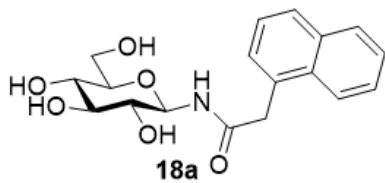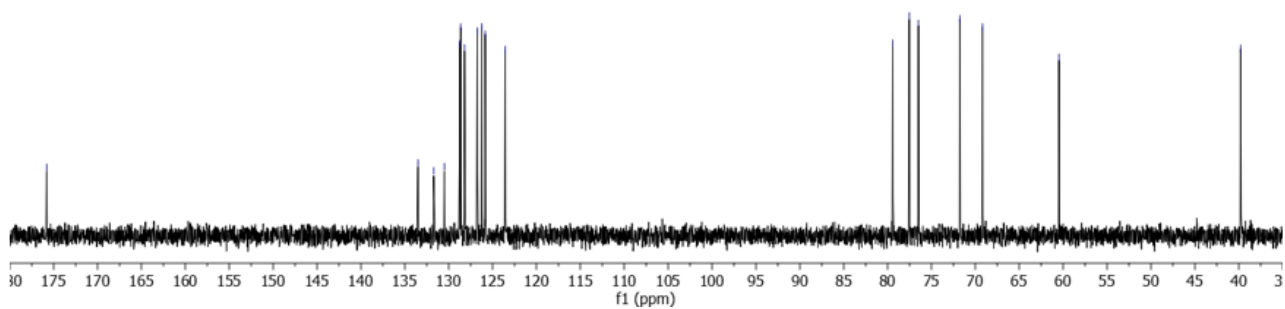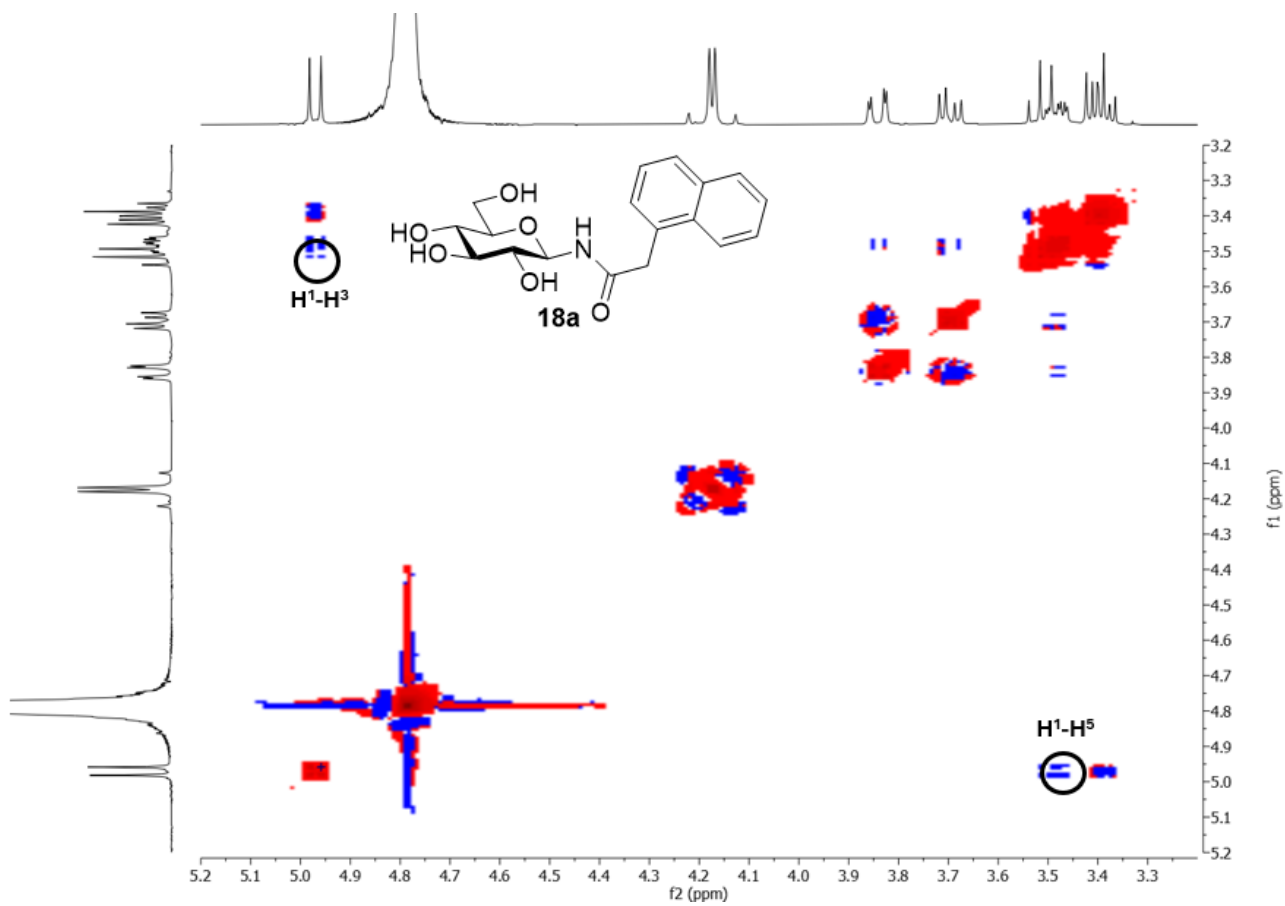

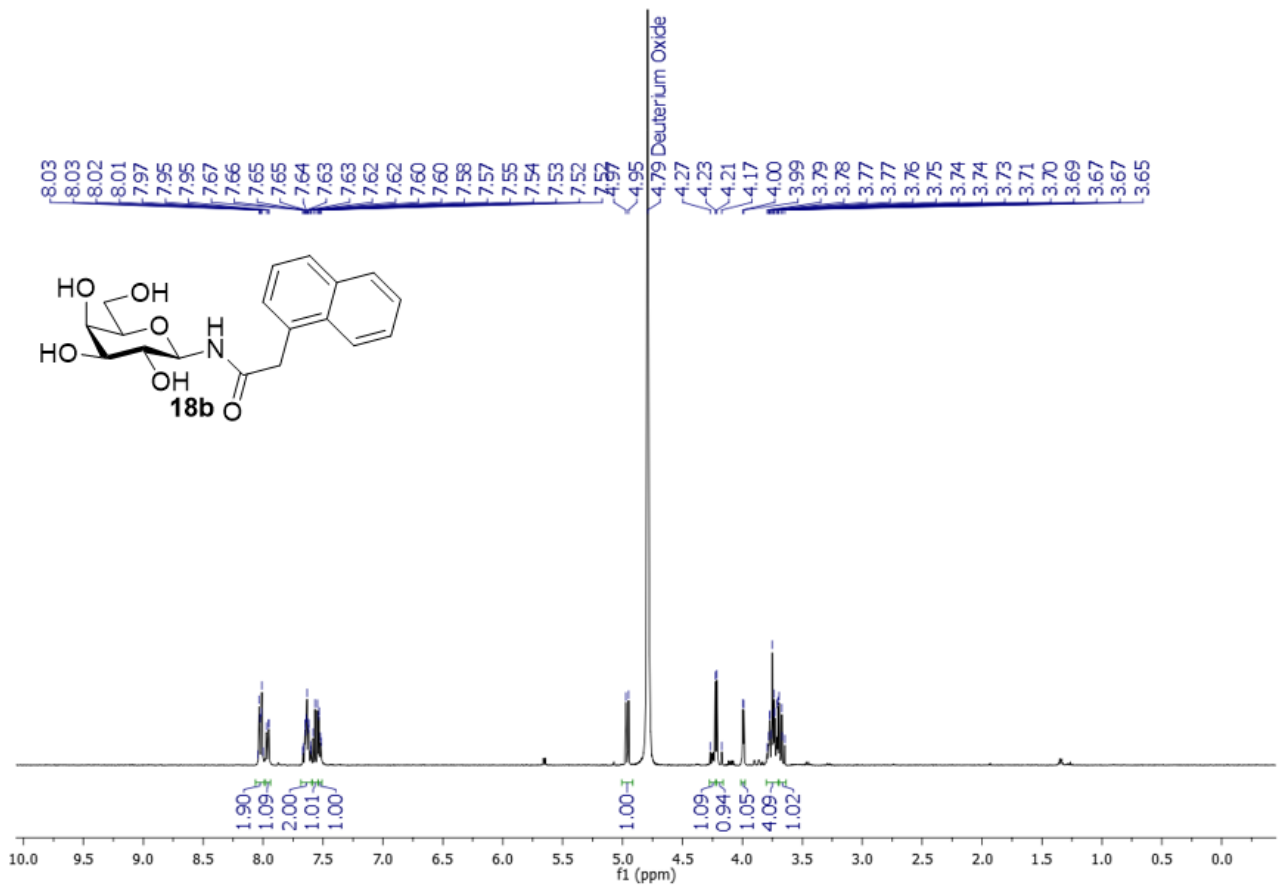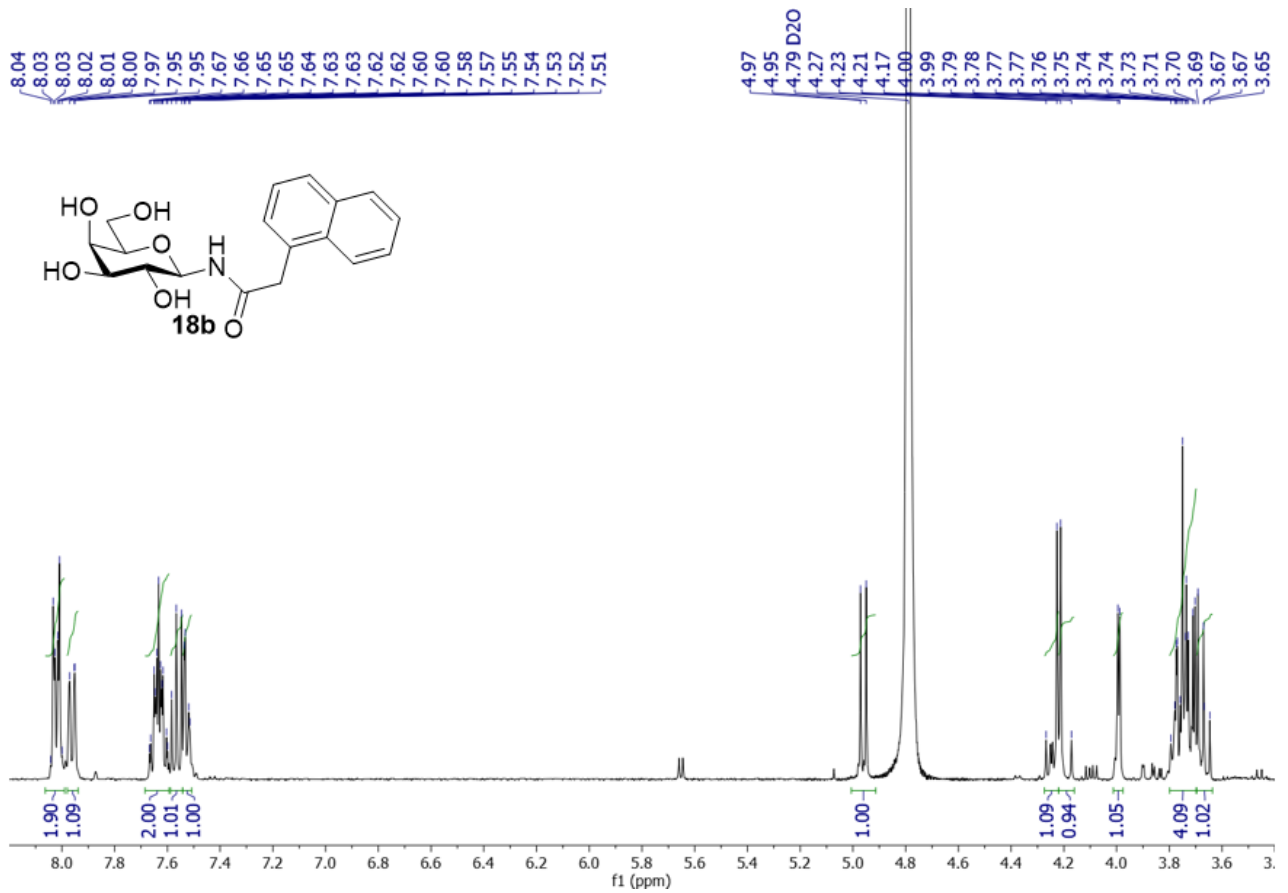

-178.4

136.1  
134.3  
133.1  
131.3  
131.2  
130.7  
129.3  
128.8  
128.4  
126.1

82.4  
79.3  
75.9  
71.9  
71.2

63.5

42.3

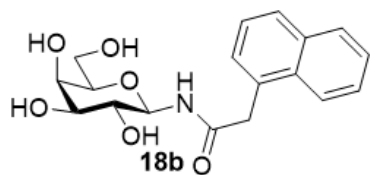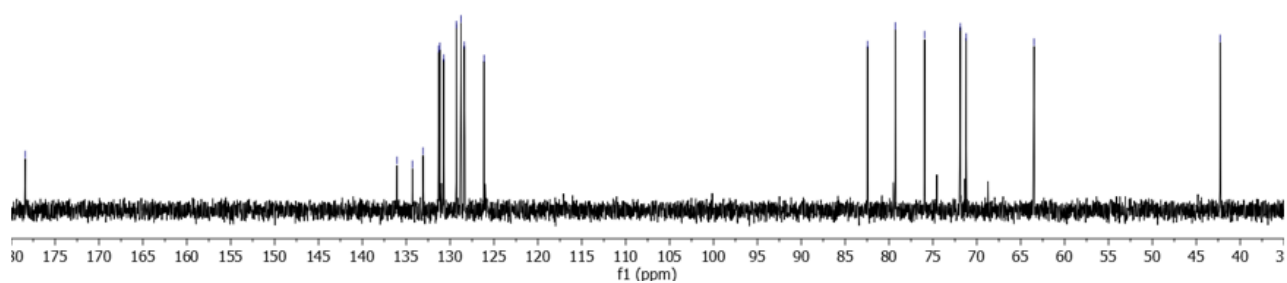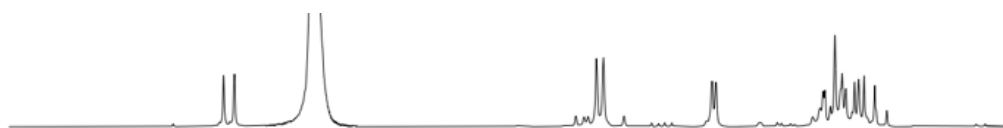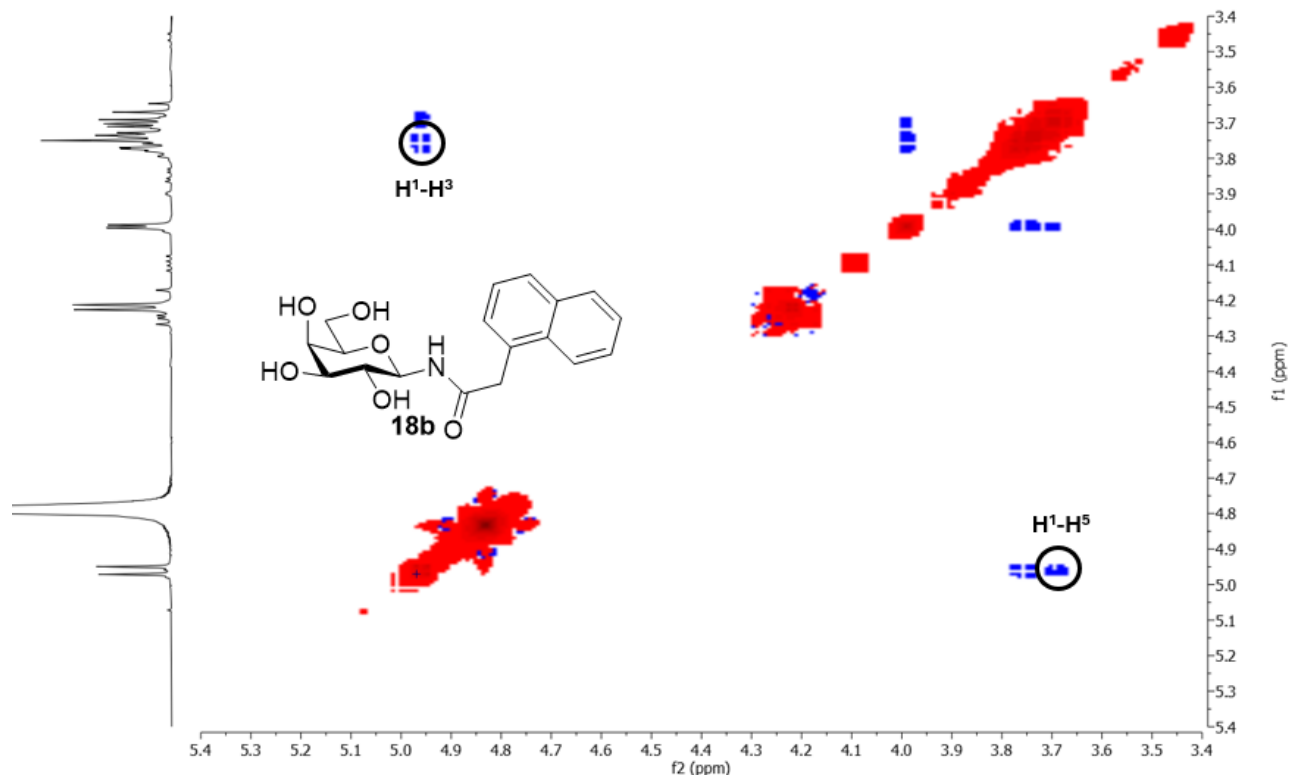

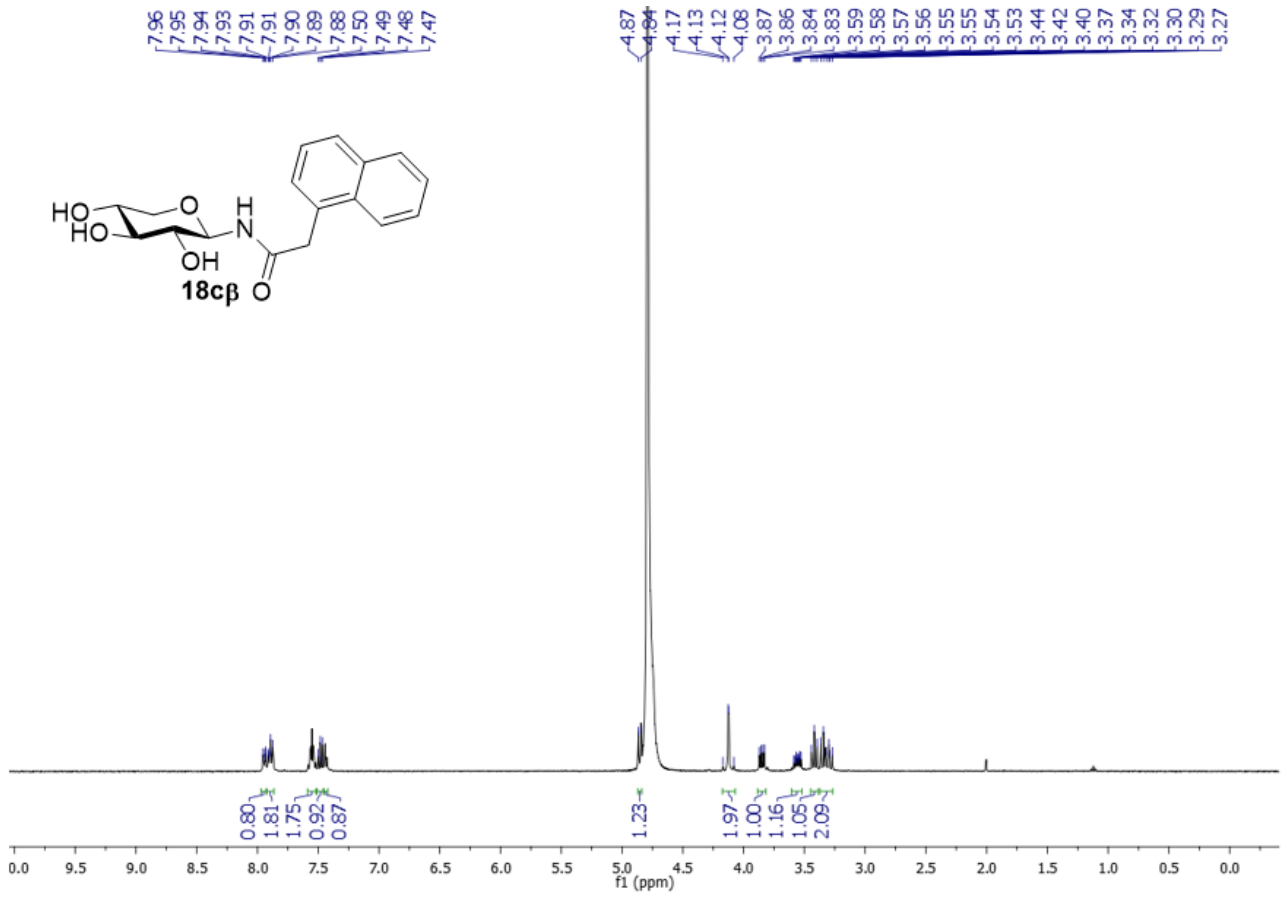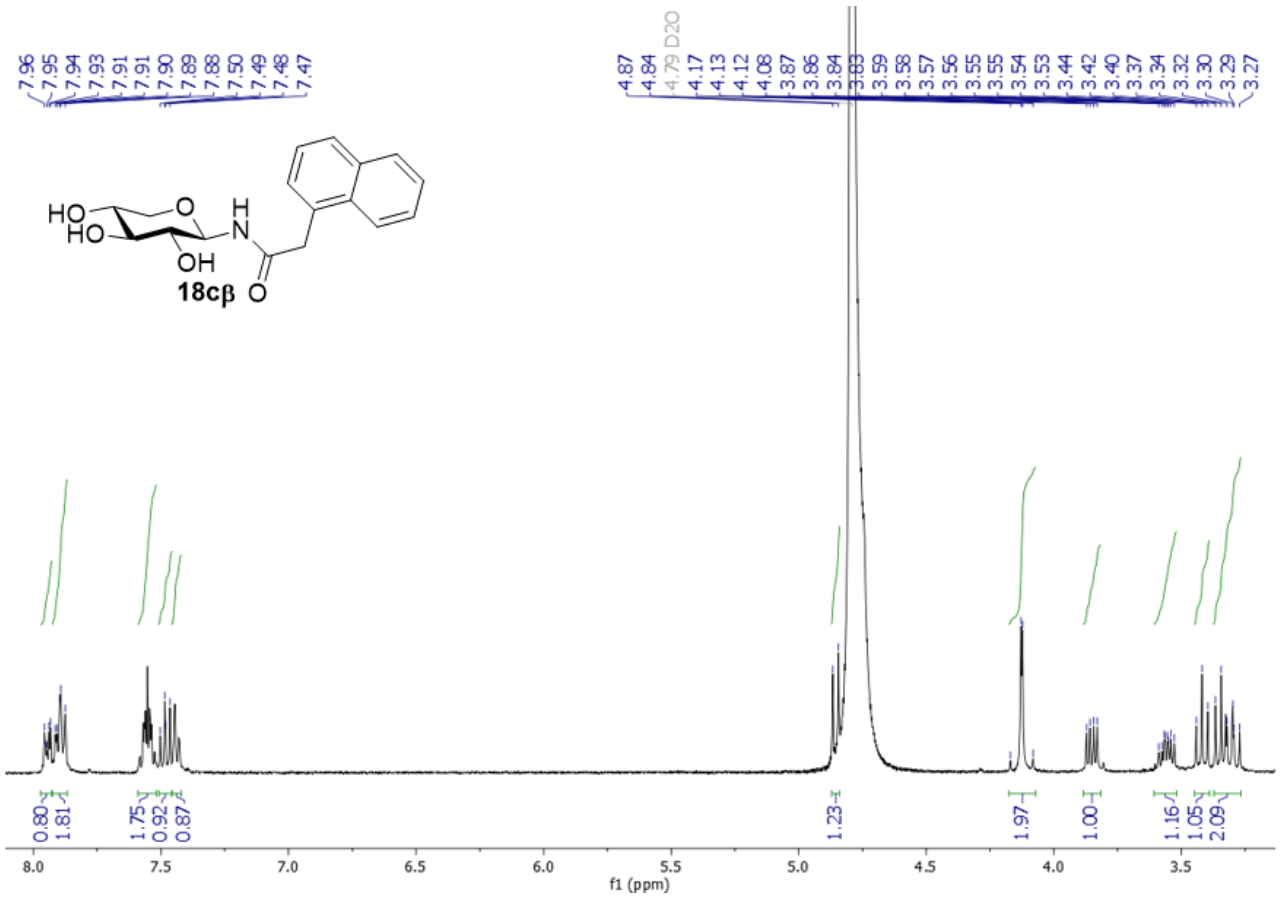



-175.8

133.4  
131.6  
130.4  
128.7  
128.6  
128.2  
126.7  
126.2  
125.8  
123.4

80.0  
76.5  
71.5  
68.9  
66.7

-39.7

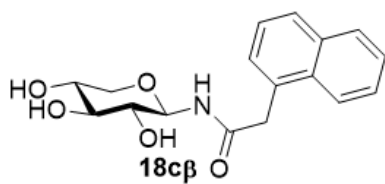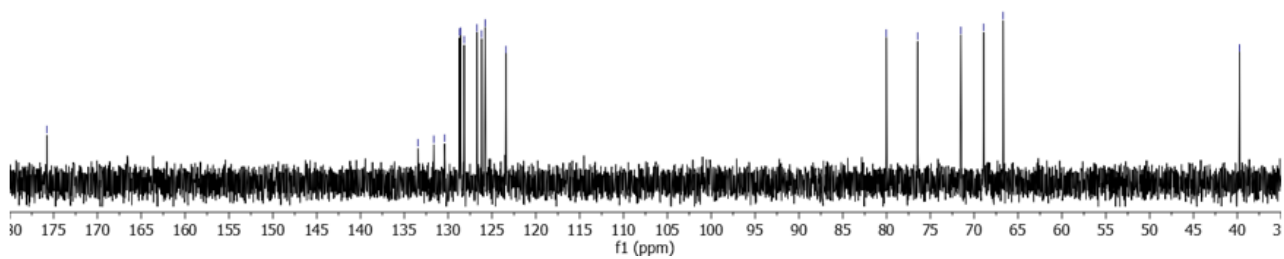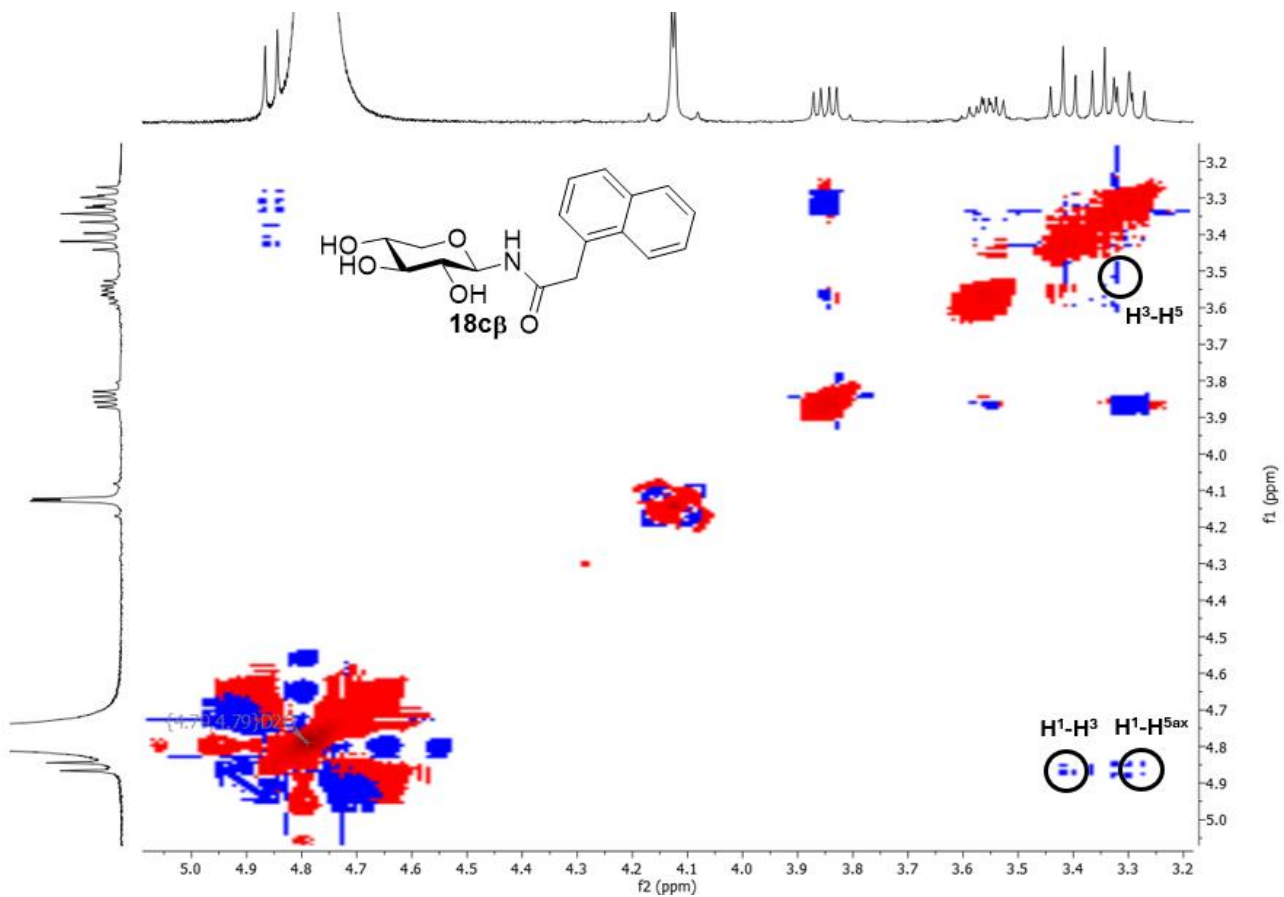

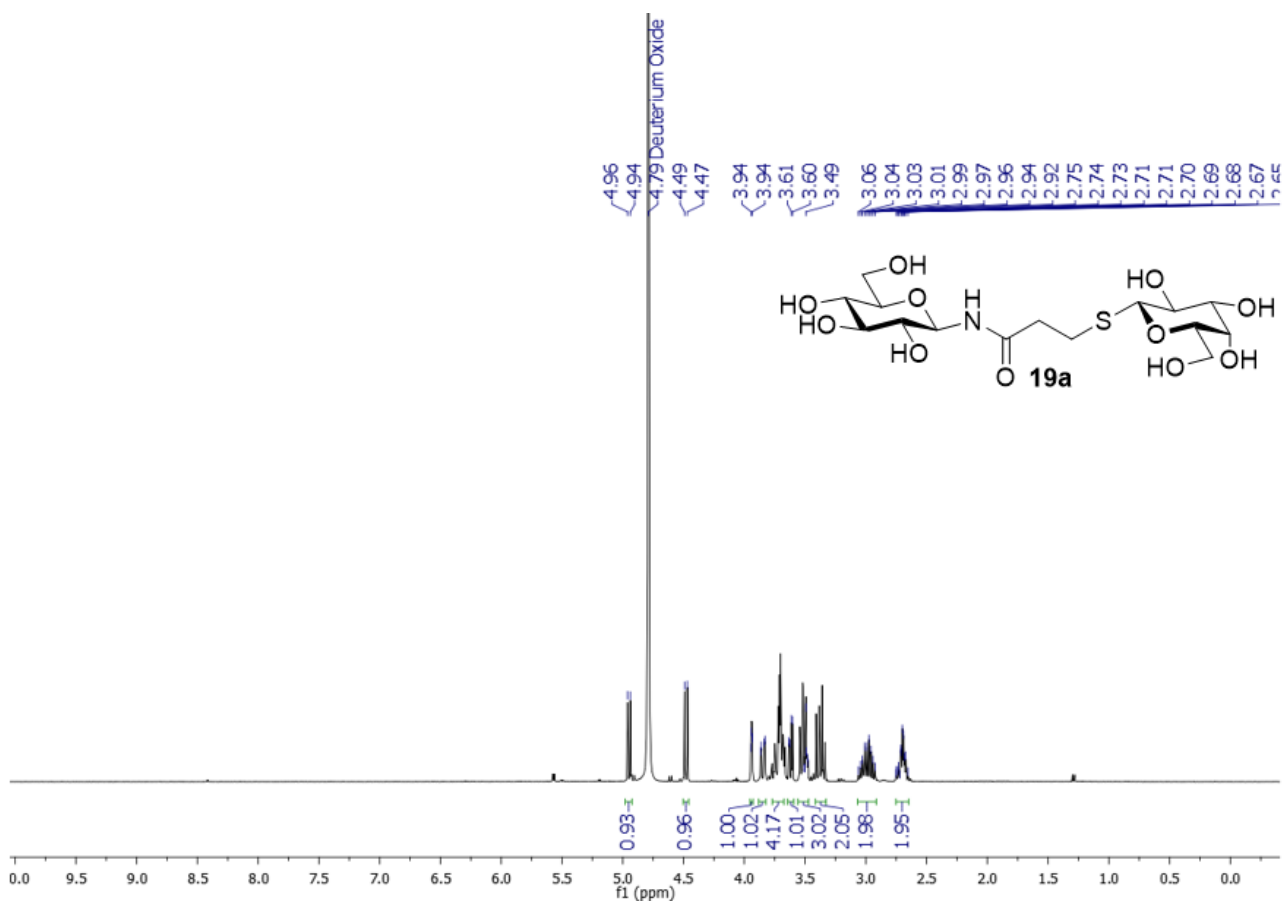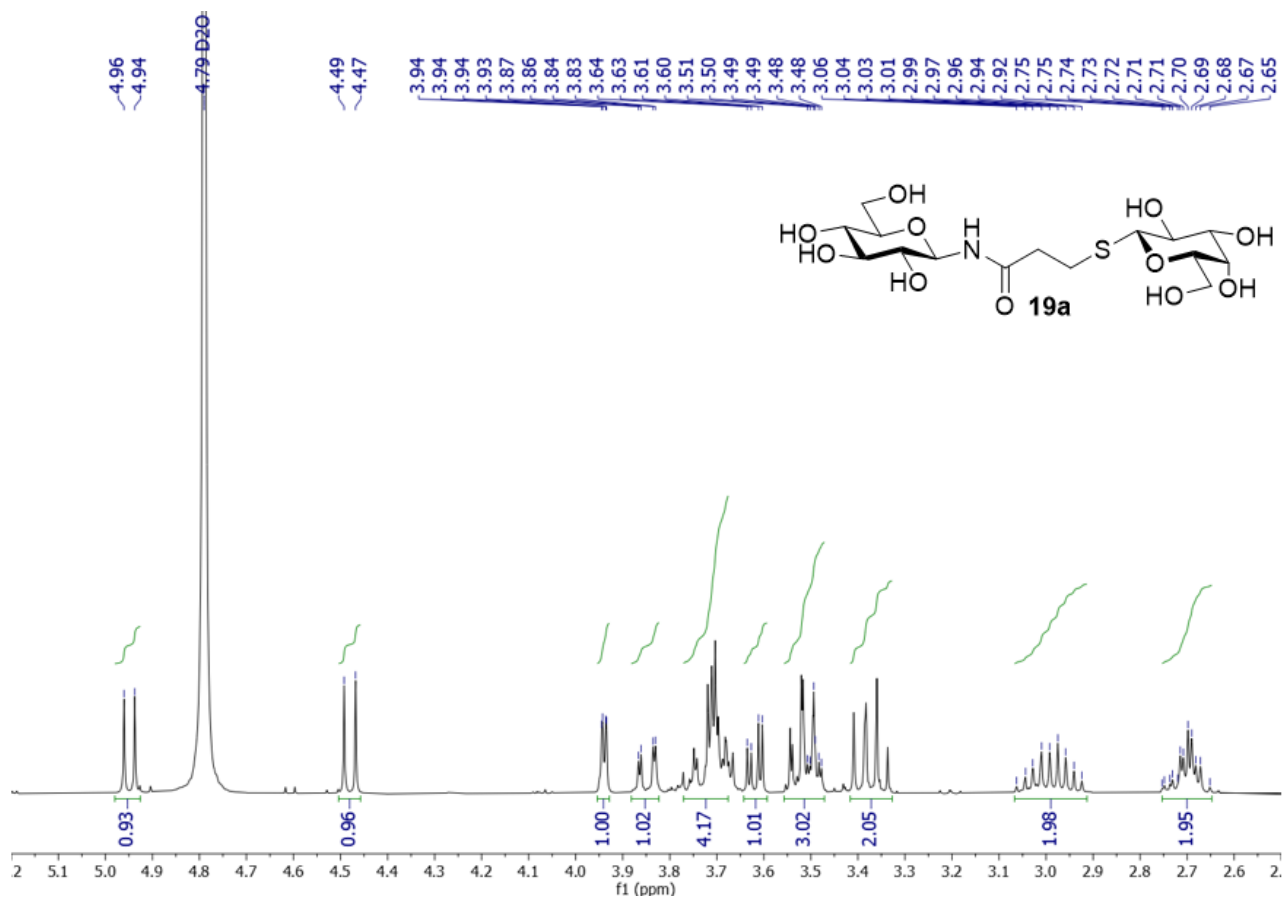

-175.7

86.1  
79.2  
78.9  
77.5  
76.4  
73.8  
71.7  
69.5  
69.2  
68.8  
61.1  
60.5

-36.4

-25.7

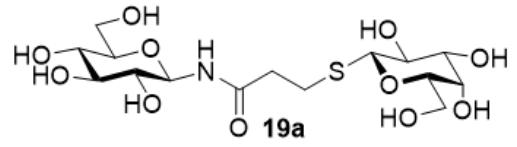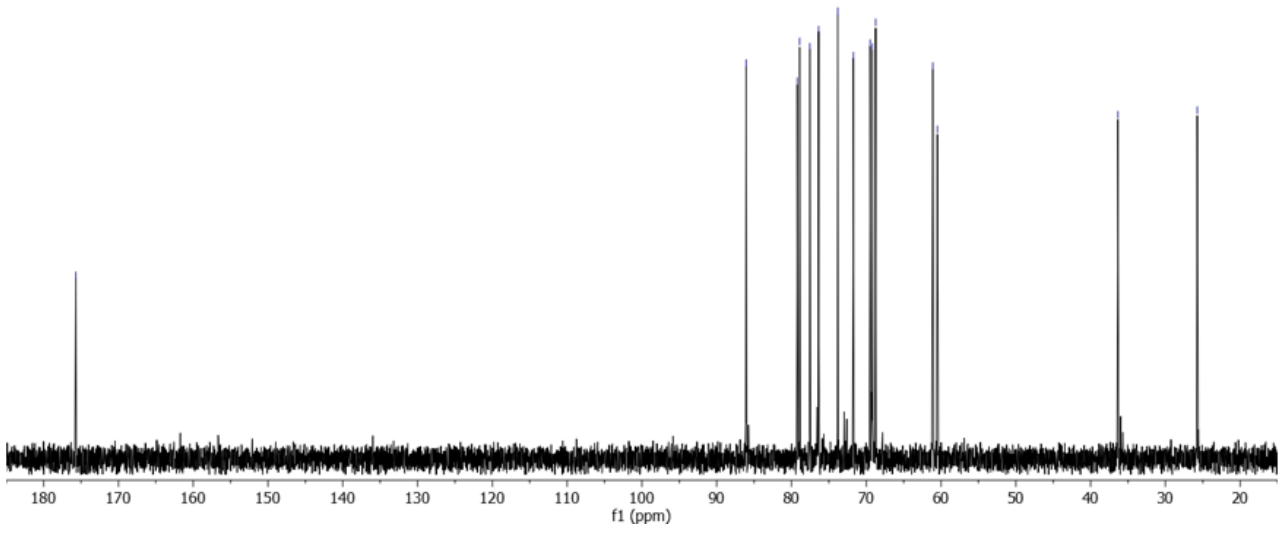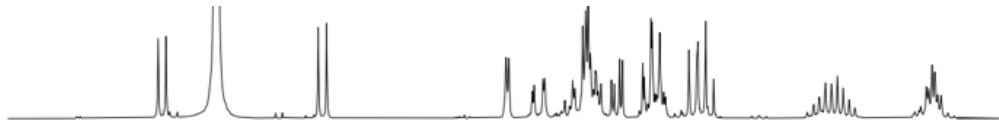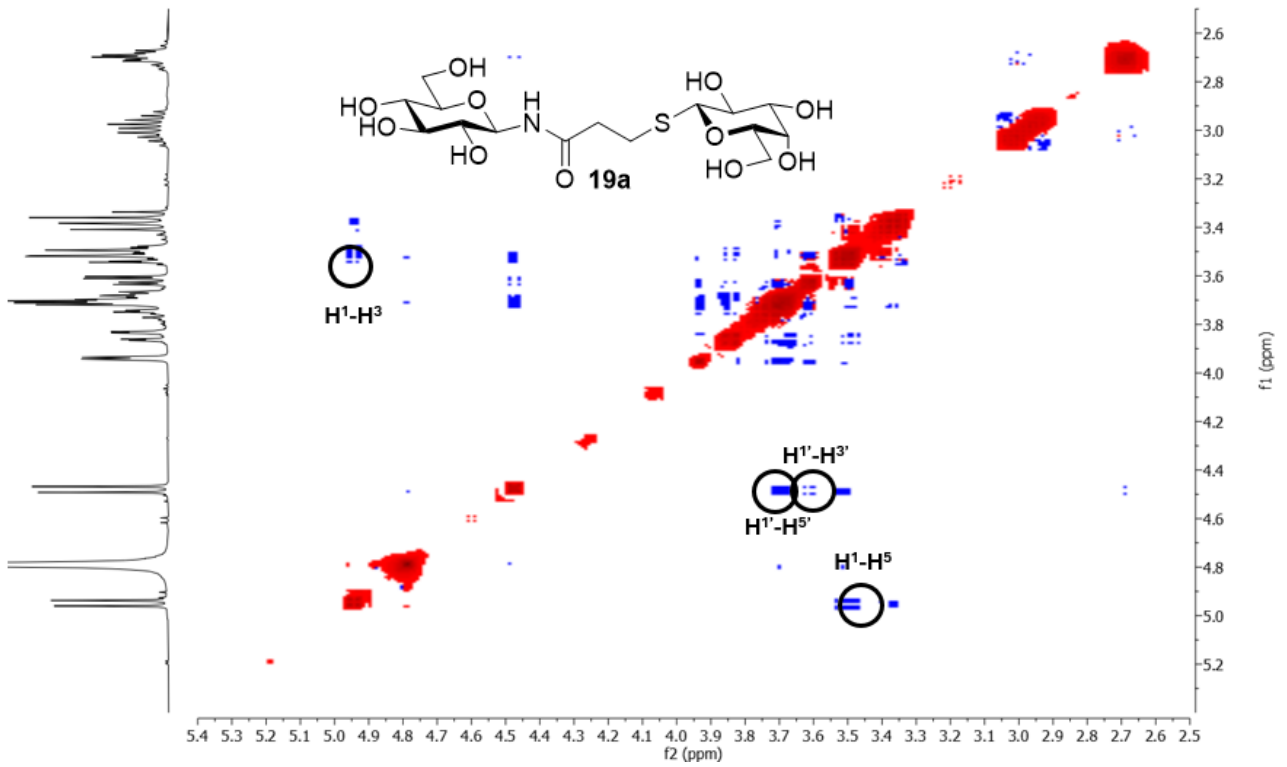

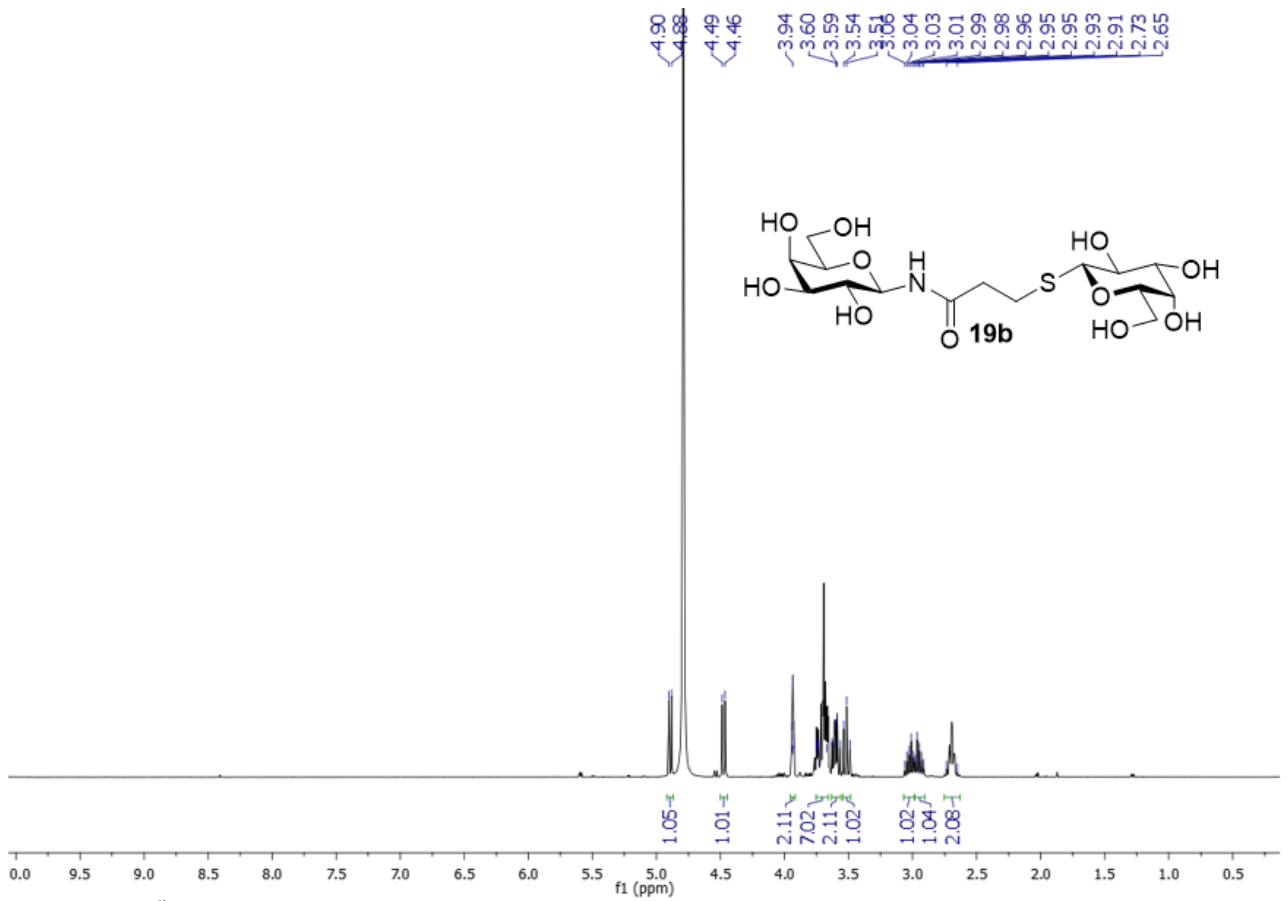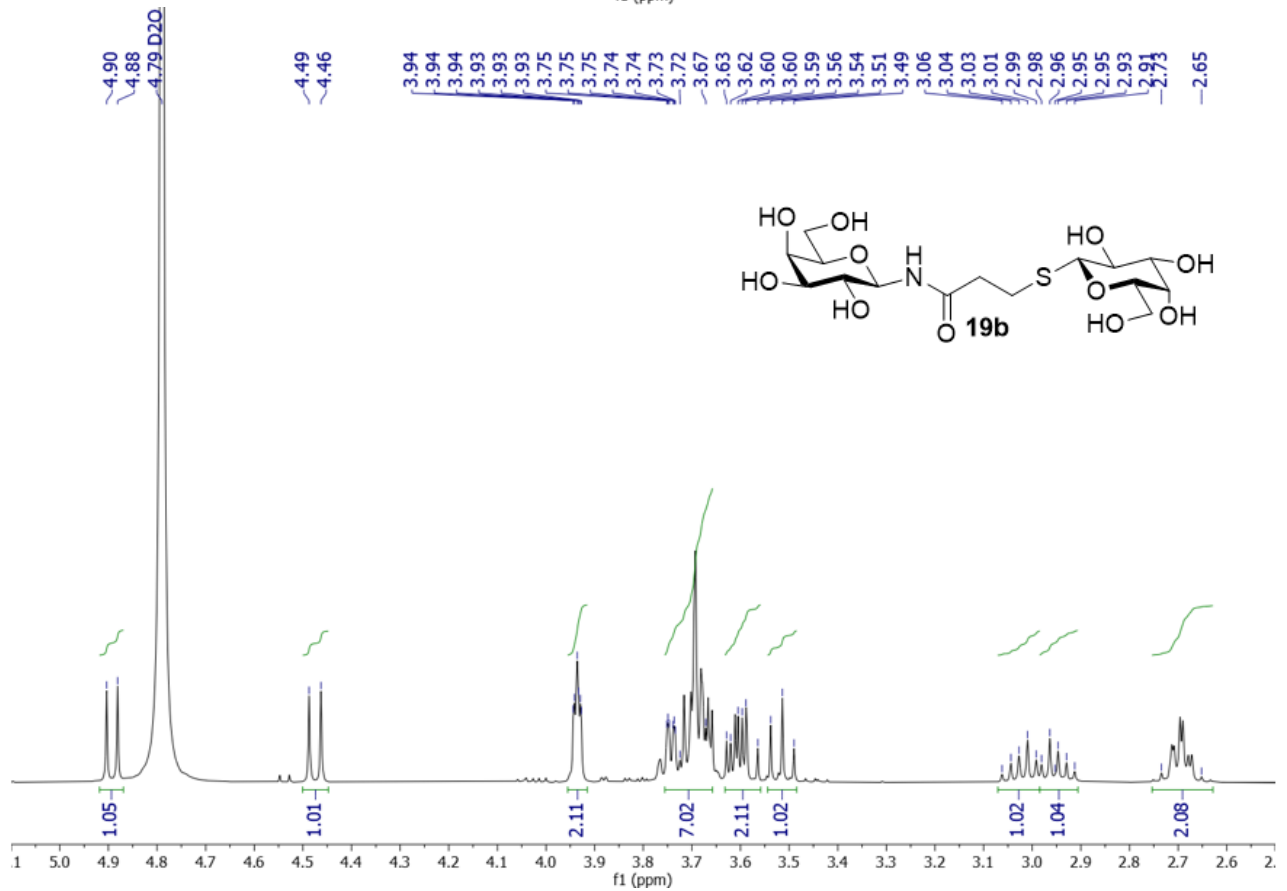

-175.7

86.0  
79.7  
78.9  
76.7  
73.8  
73.3  
69.5  
69.3  
68.8  
68.6  
61.1  
60.9

-36.4

-25.6

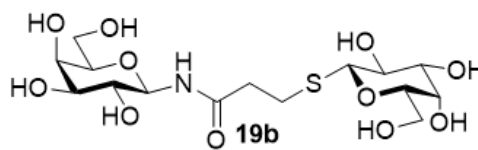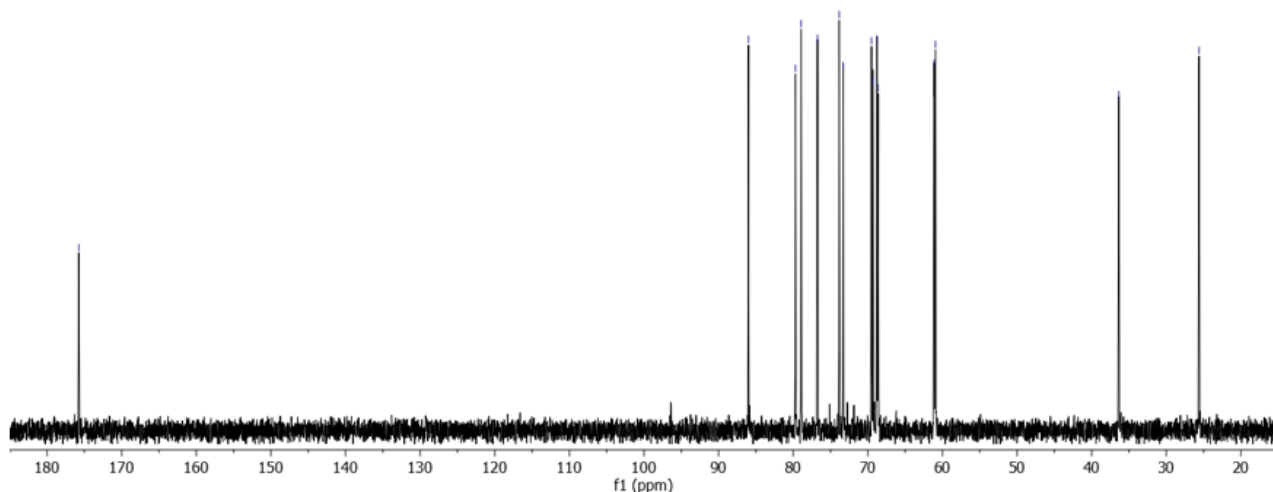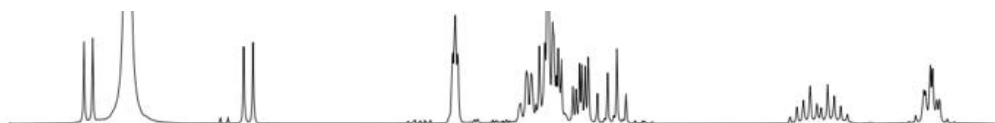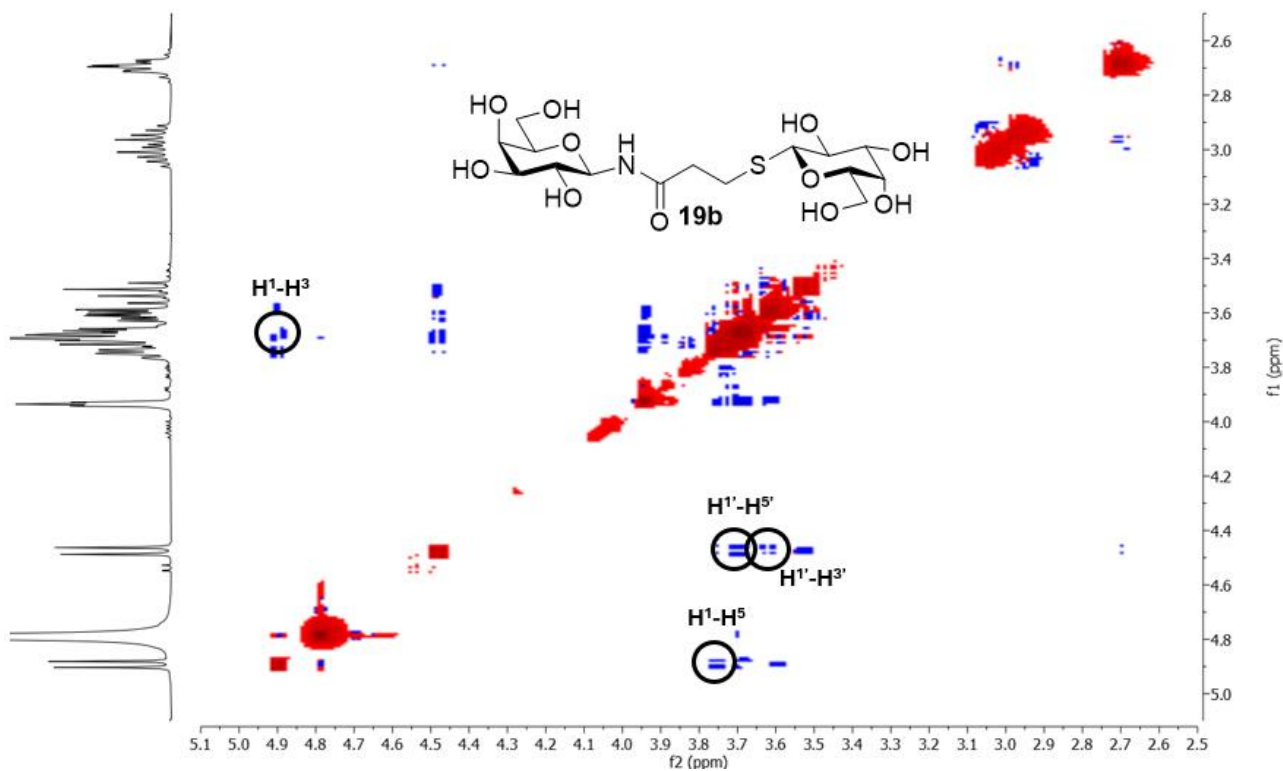

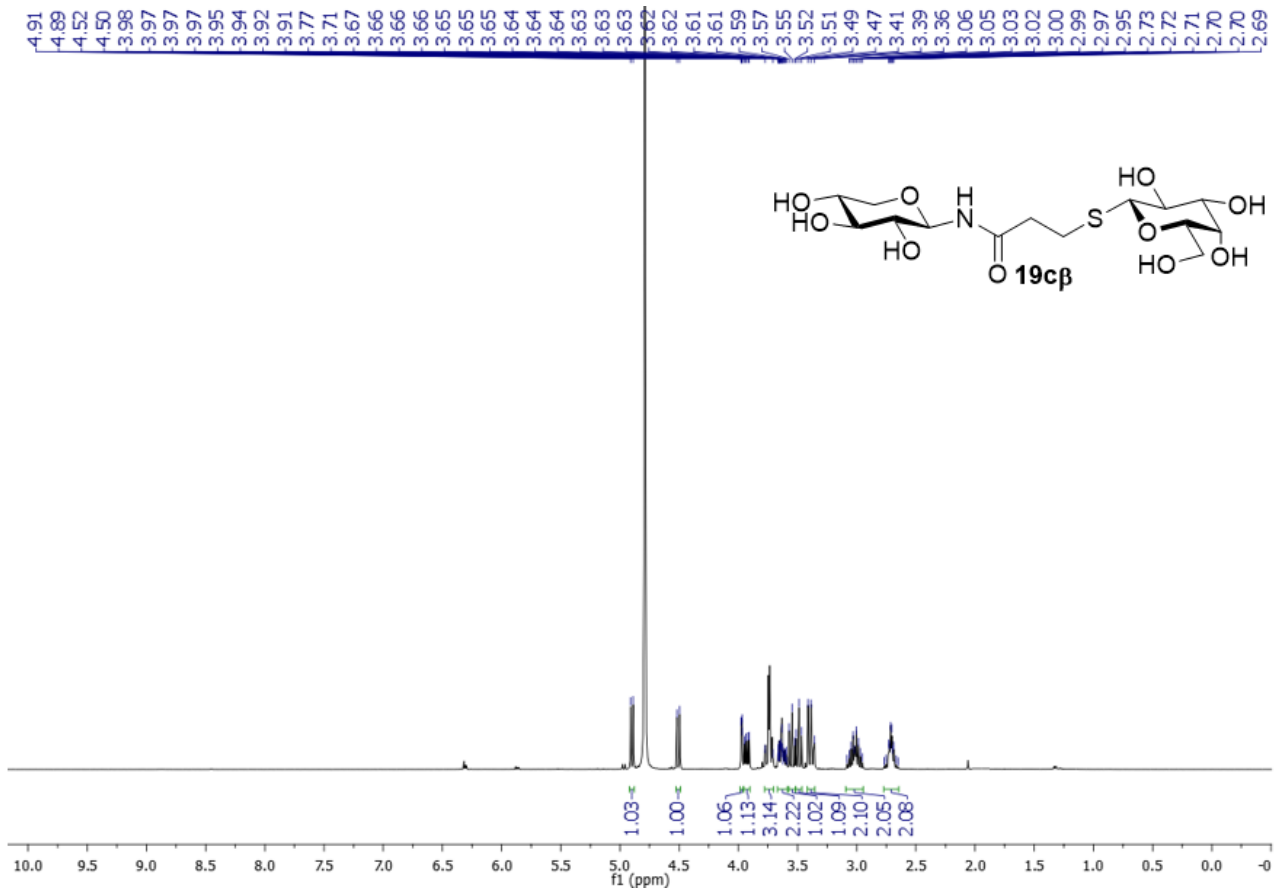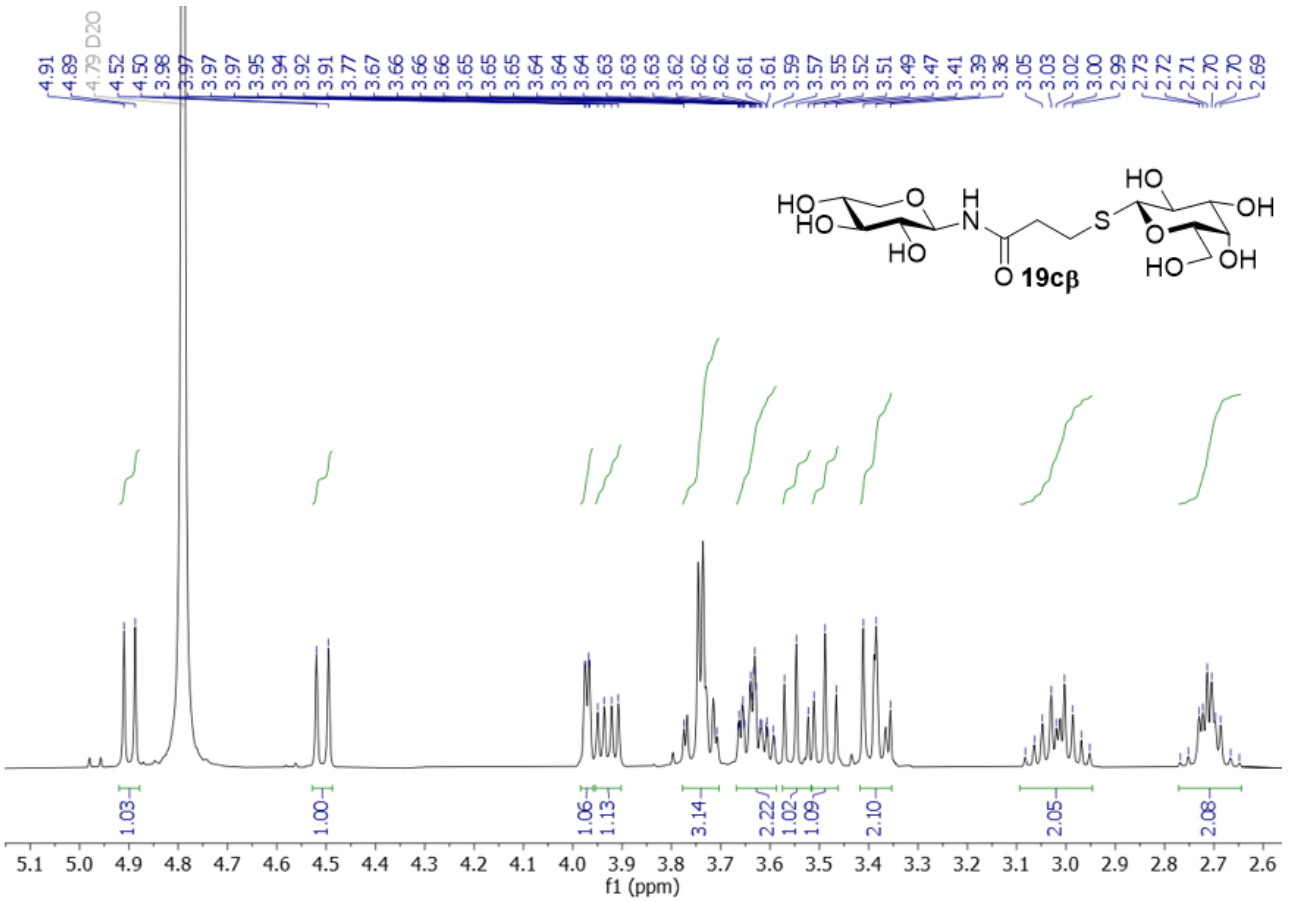

-175.8

-86.2  
-80.0  
-79.0  
-76.6  
-73.9  
-71.7  
-69.6  
-69.0  
-68.9  
-66.8  
-61.2

-36.4

-25.9

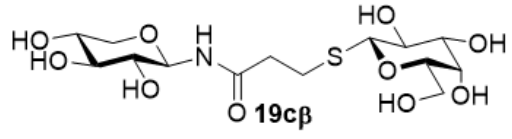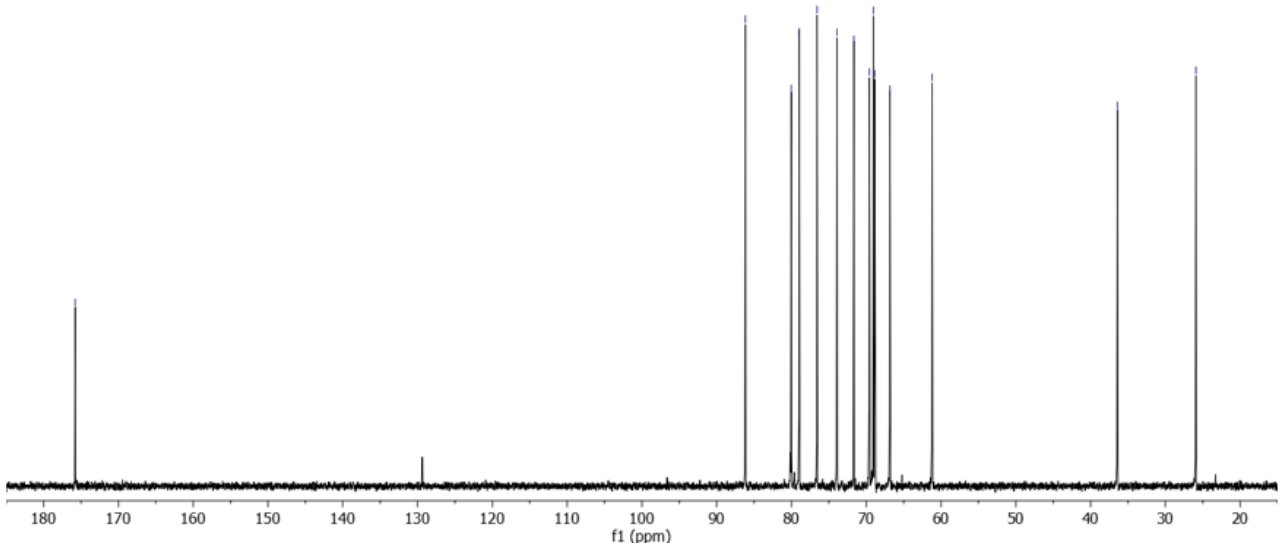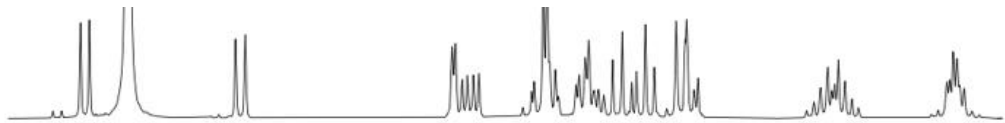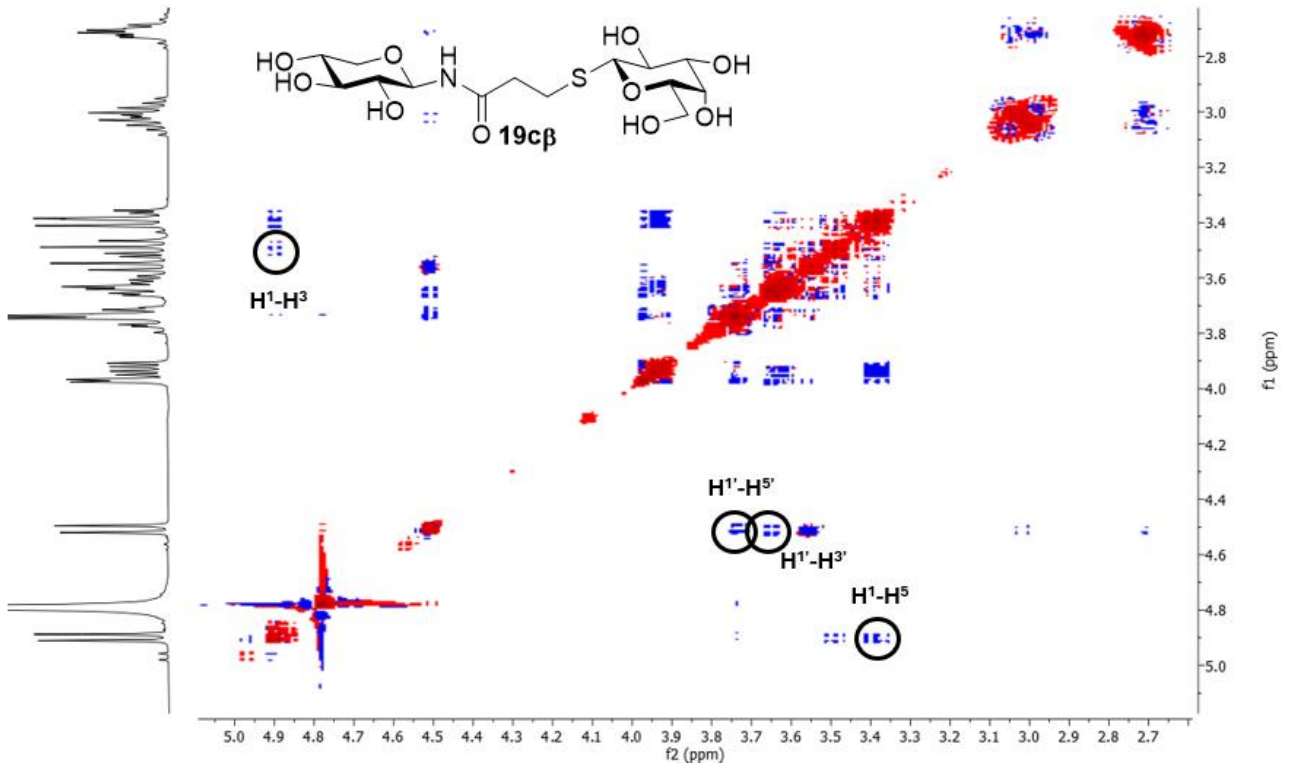

Supplement: d3ra07763b1.pdf [file d3ra07763b1.pdf]
